# Supplementary material
Source: HighWire-hosted journal article supplement (https://erj.ersjournals.com/content/59/3/2101294)
Supplement: inline-supplementary-material-1 [file inline-supplementary-material-1.pdf]

**Supplementary data: Identification of asthma associated microRNAs in bronchial biopsies**

M.P. Roffel<sup>1,2,3</sup>, I.M. Boudewijn<sup>2,4</sup>, J.L.L. van Nijnatten<sup>1,2,5</sup>, A. Faiz<sup>1,2,5</sup>, C.J. Vermeulen<sup>2,4</sup>, A.J. van Oosterhout<sup>6</sup>, K. Affleck<sup>7</sup>, W. Timens<sup>1,2</sup>, K.R. Bracke<sup>3</sup>, T. Maes<sup>3</sup>, I.H. Heijink<sup>1,2,4</sup>, C.A. Brandsma<sup>\*1,2</sup> and M. van den Berge<sup>\*2,4</sup>

**Supplementary table S1: miRNAs upregulated in asthma patients compared to healthy controls, included and excluded smokers and ICS treatment**

|             | Asthma vs healthy controls included smokers and ICS treatment |         |                  | Asthma vs healthy controls excluded smokers and ICS treatment |         |                  |
|-------------|---------------------------------------------------------------|---------|------------------|---------------------------------------------------------------|---------|------------------|
|             | Mean of normalized counts                                     | FC Log2 | Adjusted p-value | Mean of normalized counts                                     | FC Log2 | Adjusted p-value |
| miR-451a    | 30137                                                         | 2.29    | <0.001           | 29289                                                         | 2.76    | <0.001           |
| miR-449a    | 385                                                           | 1.33    | <0.001           | 347                                                           | 1.81    | <0.001           |
| miR-486-5p  | 45919                                                         | 1.14    | <0.001           | 31501                                                         | 1.99    | <0.001           |
| miR-15b-5p  | 1823                                                          | 1.12    | <0.001           | 1878                                                          | 1.29    | <0.001           |
| miR-185-5p  | 368                                                           | 1.06    | <0.001           | 321                                                           | 1.33    | <0.001           |
| miR-34c-5p  | 1282                                                          | 1.00    | <0.001           | 1247                                                          | 1.03    | <0.001           |
| miR-34c-3p  | 542                                                           | 0.89    | <0.001           | 537                                                           | 0.92    | <0.001           |
| miR-93-5p   | 801                                                           | 0.88    | <0.001           | 840                                                           | 1.16    | <0.001           |
| miR-25-3p   | 3637                                                          | 0.87    | <0.001           | 3382                                                          | 0.91    | <0.001           |
| miR-425-5p  | 593                                                           | 0.81    | <0.001           | 531                                                           | 0.95    | <0.001           |
| miR-16-5p   | 5020                                                          | 0.81    | <0.001           | 5483                                                          | 1.17    | <0.001           |
| miR-223-3p  | 1887                                                          | 0.80    | <0.001           | 2065                                                          | 0.80    | <0.01            |
| miR-484     | 615                                                           | 0.70    | <0.001           | 522                                                           | 0.58    | <0.01            |
| miR-652-3p  | 283                                                           | 0.67    | <0.001           | 265                                                           | 0.74    | <0.001           |
| miR-92a-3p  | 18239                                                         | 0.65    | <0.001           | 14711                                                         | 0.45    | <0.01            |
| miR-182-5p  | 1010                                                          | 0.63    | <0.001           | 825                                                           | 0.63    | <0.001           |
| miR-106b-5p | 197                                                           | 0.62    | <0.001           | 222                                                           | 1.16    | <0.001           |
| miR-21-5p   | 25592                                                         | 0.56    | <0.001           | 24262                                                         | 0.47    | <0.001           |
| miR-429     | 738                                                           | 0.55    | <0.001           | 675                                                           | 0.65    | <0.001           |
| miR-148b-3p | 480                                                           | 0.48    | <0.001           | 455                                                           | 0.56    | <0.001           |
| miR-183-5p  | 421                                                           | 0.47    | <0.001           | 364                                                           | 0.51    | <0.001           |
| miR-20a-5p  | 265                                                           | 0.46    | <0.001           | 295                                                           | 0.84    | <0.001           |
| miR-19b-3p  | 168                                                           | 0.44    | <0.001           | 187                                                           | 0.61    | <0.001           |
| miR-30d-5p  | 6121                                                          | 0.32    | <0.001           | 6225                                                          | 0.19    | <0.001           |
| miR-103a-3p | 3117                                                          | 0.19    | <0.001           | 3228                                                          | 0.38    | <0.001           |
| miR-92b-3p  | 2195                                                          | 0.86    | <0.01            | 1985                                                          | 0.61    | <0.01            |
| miR-203a-3p | 451                                                           | 0.50    | <0.01            | 325                                                           | 0.52    | <0.01            |
| miR-200b-3p | 8002                                                          | 0.40    | <0.01            | 7413                                                          | 0.46    | <0.001           |
| miR-142-5p  | 562                                                           | 0.37    | <0.01            | 632                                                           | 0.68    | <0.001           |
| miR-200a-3p | 1404                                                          | 0.36    | <0.01            | 1260                                                          | 0.43    | <0.01            |
| miR-22-3p   | 1043                                                          | 0.32    | <0.01            | 1029                                                          | 0.09    | <b>&gt;0.05</b>  |
| miR-374a-5p | 405                                                           | 0.31    | <0.01            | 436                                                           | 0.47    | <0.01            |

Supplementary table S1 continued

|                    | Asthma vs healthy controls included smokers and ICS treatment |         |                  | Asthma vs healthy controls excluded smokers and ICS treatment |         |                     |
|--------------------|---------------------------------------------------------------|---------|------------------|---------------------------------------------------------------|---------|---------------------|
|                    | Mean of normalized counts                                     | FC Log2 | Adjusted p-value | Mean of normalized counts                                     | FC Log2 | Adjusted p-value    |
| <b>miR-574-3p</b>  | 323                                                           | 0.28    | <0.01            | 292                                                           | -0.14   | <b>&gt;0.05</b>     |
| <b>miR-30b-5p</b>  | 1425                                                          | 0.26    | <0.01            | 1421                                                          | 0.10    | <b>&gt;0.05</b>     |
| <b>miR-186-5p</b>  | 855                                                           | 0.25    | <0.01            | 900                                                           | 0.12    | <b>&gt;0.05</b>     |
| <b>let-7d-3p</b>   | 215                                                           | 0.23    | <0.01            | 234                                                           | -0.56   | <b><u>≤0.01</u></b> |
| <b>miR-151a-3p</b> | 595                                                           | 0.15    | <0.01            | 610                                                           | 0.10    | <b>&gt;0.05</b>     |
| <b>miR-374b-5p</b> | 422                                                           | 0.16    | <0.05            | 458                                                           | 0.26    | <0.05               |
| <b>miR-190b</b>    | 211                                                           | 0.80    | <0.05            | 226                                                           | 0.83    | <0.01               |
| <b>miR-200c-3p</b> | 14888                                                         | 0.43    | <0.05            | 13044                                                         | 0.42    | <0.05               |
| <b>miR-141-3p</b>  | 381                                                           | 0.43    | <0.05            | 333                                                           | 0.39    | <0.05               |
| <b>miR-423-5p</b>  | 1305                                                          | 0.41    | <0.05            | 1168                                                          | -0.26   | <b>&gt;0.05</b>     |
| <b>miR-140-3p</b>  | 1487                                                          | 0.41    | <0.05            | 1406                                                          | 0.21    | <b>&gt;0.05</b>     |
| <b>miR-191-5p</b>  | 5622                                                          | 0.34    | <0.05            | 5074                                                          | 0.18    | <b>&gt;0.05</b>     |
| <b>miR-1260b</b>   | 533                                                           | 0.27    | <0.05            | 509                                                           | -0.15   | <b>&gt;0.05</b>     |
| <b>miR-1260a</b>   | 554                                                           | 0.25    | <0.05            | 534                                                           | -0.22   | <b>&gt;0.05</b>     |
| <b>miR-128-3p</b>  | 351                                                           | 0.24    | <0.05            | 349                                                           | 0.05    | <b>&gt;0.05</b>     |
| <b>miR-320a</b>    | 3828                                                          | 0.09    | <0.05            | 3879                                                          | -0.34   | <b><u>≤0.05</u></b> |

**Supplementary table S2: miRNAs downregulated in asthma patients compared to healthy controls, included and excluded smokers and ICS treatment**

|             | Asthma vs healthy controls included smokers and ICS treatment |         |                  | Asthma vs healthy controls excluded smokers and ICS treatment |         |                  |
|-------------|---------------------------------------------------------------|---------|------------------|---------------------------------------------------------------|---------|------------------|
|             | Mean of normalized counts                                     | FC Log2 | Adjusted p-value | Mean of normalized counts                                     | FC Log2 | Adjusted p-value |
| miR-125b-5p | 7973                                                          | -0.59   | <0.001           | 9157                                                          | -0.53   | <0.001           |
| let-7c-5p   | 7275                                                          | -0.54   | <0.001           | 8426                                                          | -0.69   | <0.001           |
| miR-195-5p  | 1143                                                          | -0.53   | <0.001           | 1290                                                          | -0.49   | <0.001           |
| miR-10a-5p  | 3169                                                          | -0.47   | <0.001           | 3702                                                          | -0.45   | <0.001           |
| miR-100-5p  | 2584                                                          | -0.47   | <0.001           | 2876                                                          | -0.24   | <0.01            |
| miR-125a-5p | 11900                                                         | -0.46   | <0.001           | 13862                                                         | -0.64   | <0.001           |
| miR-199b-3p | 6078                                                          | -0.45   | <0.001           | 6988                                                          | -0.37   | <0.001           |
| miR-10b-5p  | 1862                                                          | -0.40   | <0.001           | 2246                                                          | -0.57   | <0.001           |
| miR-99a-5p  | 2976                                                          | -0.36   | <0.001           | 3478                                                          | -0.30   | <0.001           |
| let-7e-5p   | 1829                                                          | -0.33   | <0.001           | 2013                                                          | -0.60   | <0.001           |
| miR-214-3p  | 802                                                           | -0.30   | <0.001           | 848                                                           | -0.39   | <0.01            |
| miR-361-5p  | 559                                                           | -0.27   | <0.001           | 605                                                           | -0.31   | <0.001           |
| miR-574-3p  | 678                                                           | -0.21   | <0.001           | 691                                                           | -0.38   | <0.01            |
| miR-193a-5p | 145                                                           | -0.06   | <0.001           | 149                                                           | -0.65   | <0.001           |
| let-7b-5p   | 20670                                                         | -0.05   | <0.001           | 22519                                                         | -0.59   | <0.01            |
| miR-155-5p  | 1406                                                          | -0.42   | <0.01            | 1637                                                          | -0.24   | <b>&gt;0.05</b>  |
| miR-181b-5p | 624                                                           | -0.28   | <0.01            | 603                                                           | -0.23   | <0.05            |
| miR-23b-3p  | 8787                                                          | -0.26   | <0.01            | 9153                                                          | -0.23   | <0.05            |
| miR-139-5p  | 479                                                           | -0.25   | <0.01            | 541                                                           | -0.31   | <0.05            |
| miR-342-3p  | 1074                                                          | -0.25   | <0.01            | 1173                                                          | -0.13   | <b>&gt;0.05</b>  |
| miR-26a-5p  | 55527                                                         | -0.20   | <0.01            | 60780                                                         | -0.26   | <0.01            |
| miR-30a-3p  | 604                                                           | -0.16   | <0.01            | 665                                                           | -0.45   | <0.001           |
| let-7a-5p   | 62744                                                         | -0.13   | <0.01            | 65528                                                         | -0.39   | <0.05            |
| miR-1247-5p | 170                                                           | -0.12   | <0.01            | 188                                                           | -0.73   | <0.01            |
| miR-199b-5p | 546                                                           | -0.47   | <0.05            | 624                                                           | -0.40   | <0.05            |
| miR-455-3p  | 117                                                           | -0.41   | <0.05            | 121                                                           | -0.23   | <b>&gt;0.05</b>  |
| miR-150-5p  | 2175                                                          | -0.22   | <0.05            | 2512                                                          | -0.36   | <0.05            |
| miR-99b-5p  | 1314                                                          | -0.21   | <0.05            | 1487                                                          | -0.19   | <0.05            |
| miR-101-3p  | 1273                                                          | -0.19   | <0.05            | 1487                                                          | 0.01    | <b>&gt;0.05</b>  |
| miR-26b-5p  | 12756                                                         | -0.18   | <0.05            | 13915                                                         | -0.10   | <b>&gt;0.05</b>  |

**Supplementary table S3: All negatively correlated genes that were also associated with asthma**

| miRNA              | Negatively correlated asthma-associated genes<br>(bold = validated target gene of miRNA) |           |           |            |           |           |           |
|--------------------|------------------------------------------------------------------------------------------|-----------|-----------|------------|-----------|-----------|-----------|
| <b>miR-199b-5p</b> | NCF2                                                                                     | RGS18     | MEFV      | VNN2       | SIRPB2    | SERPINA1  | MGAM      |
|                    | VIM-AS1                                                                                  | SMIM22    | FPR1      | SULT1B1    | FAM65B    | MNDA      | FCGR3B    |
|                    | S100A8                                                                                   | CDKN2D    | TRIM36    | KRT23      | CSF3R     | BPGM      | CXCR2     |
|                    | CXCR2                                                                                    | TUBB1     | AGR3      | C14orf142  | CR1       | HNF4G     | BBS12     |
|                    | ANXA3                                                                                    | FCGR2A    | BNIP3L    | RPA3       | SELL      | RP2       | RAB20     |
|                    | GCA                                                                                      | PRR15L    | CCDC160   | PCDHB1     | DEFB1     | DUSP4     | CD200R1   |
|                    | KLHDC9                                                                                   | COPRS     | ITIH6     | ZNF165     | SCGB2A1   | PI3       | DUSP19    |
|                    | HSPA6                                                                                    | CTSS      | ENPP5     | MCMDC2     | DGAT2     | ENPP4     | C16orf54  |
|                    | RHOU                                                                                     | DAPP1     | RPP40     | CDKN2B-AS1 | RASEF     | TMEM125   | SMAP2     |
|                    | UGT8                                                                                     | LINC01132 | CFP       | RPL26L1    | CERKL     | TTC30A    | ARHGEF38  |
|                    | C11orf70                                                                                 | S100A9    | MLF1      | C15orf65   | DNER      | LILRB2    | TNFRSF10C |
|                    | CHST4                                                                                    | KIAA0895  | MYCBP     | MB         | RMI1      | CCDC34    | TMPRSS7   |
|                    | MORN2                                                                                    | FAM229B   | CDKL2     | C8orf37    | SAP30     | MSRB1     | CDKN2B    |
|                    | YOD1                                                                                     | RABL5     | NME5      | MRPL42     | ARL6      | MPZL3     | TTC30B    |
|                    | RNASE6                                                                                   | HILPDA    | SLC11A1   | IFT88      | NCALD     | ESRRG     | PSENEN    |
|                    | IPMK                                                                                     | STRADB    | SPAG1     | SRD5A2     | LRP8      | TMEM107   | CCDC148   |
|                    | SPAG16                                                                                   | PPP1R14C  | APOO      | ZMYND12    | GALNT3    | DRAM2     | FSIP1     |
|                    | NT5C3A                                                                                   | DNAJA1    | MBOAT2    | PPP1R42    | MEIG1     | SPATA4    | EPB41L4B  |
|                    | GRAMD1C                                                                                  | TIGD4     | OR7E47P   | WRB        | ATP6V0A4  | AKAP14    | EMR3      |
|                    | RASGEF1B                                                                                 | STX11     | C6        | SRD5A3     | DDAH1     | SCCPDH    | CD24P4    |
|                    | EFCAB10                                                                                  | SLC17A5   | TFF3      | MROH9      | SMPD2     | NAT1      | LXN       |
|                    | IQUB                                                                                     | HBA1      | GABARAPL2 | RRM2P3     | INHBB     | C15orf26  | MNS1      |
|                    | DNPH1                                                                                    | TSPAN13   | GFM2      | CCDC89     | ATP6V1D   | IFT57     | EPCAM     |
|                    | SPATA17                                                                                  | PIH1D2    | SDR16C5   | SOAT1      | IGF2BP3   | NUS1      | FBXO36    |
|                    | OCLN                                                                                     | EFCAB11   | FSD1L     | GAR1       | DCAF12    | MDH1B     | RRAGD     |
|                    | SPA17                                                                                    | MIPEP     | TMPRSS3   | RAB27B     | PROM1     | FAM151B   | C9orf72   |
|                    | ENO4                                                                                     | PGM2L1    | TMEM45B   | CDS1       | GCNT4     | PIH1D3    | ABHD5     |
|                    | DHX32                                                                                    | ZNF214    | DYNLRB2   | DNAJC6     | VAMP8     | ANKEF1    | OSCP1     |
|                    | LZTFL1                                                                                   | ZMAT2     | CCDC181   | FAM81A     | C10orf107 | ISCA1     | SEC23B    |
|                    | DCDC2                                                                                    | TMEM154   | TSPAN19   | LRRC34     | GFPT1     | C6orf57   | CETN2     |
|                    | IL13RA1                                                                                  | VSTM2L    | DPEP2     | TEX9       | CCDC65    | C12orf60  | TRIP13    |
|                    | GLT1D1                                                                                   | PHTF1     | TTC9      | SUSD1      | CAPS2     | STXBP4    | CATSPERD  |
|                    | RHPN2                                                                                    | FAM169A   | IQCD      | EFCAB7     | EFHC2     | UFC1      | LRRIQ3    |
|                    | CCDC176                                                                                  | CBY1      | MAL2      | TTC26      | GLA       | RPL7AP64  | DNAAF2    |
|                    | IFT52                                                                                    | TAT       | ZBTB18    | LRRC25     | LINC00643 | NMBR      | TMC5      |
|                    | SAMD15                                                                                   | ABHD6     | CASC1     | SGMS2      | RALGPS2   | PI4K2B    | TCTEX1D1  |
|                    | AGTPBP1                                                                                  | AK7       | C11orf88  | FECH       | CHIC2     | PPIL6     | GLRX2     |
|                    | CYSTM1                                                                                   | TCTEX1D2  | DPH3      | MDM1       | AGR2      | C21orf128 | FAM174A   |
|                    | ANKRD18CP                                                                                | ERICH2    | C9orf116  | FCN1       | CXorf57   | LEKR1     | IPO11     |

Supplementary table S3 continued

| miRNA       | Negatively correlated asthma-associated genes<br>(bold = validated target gene of miRNA) |              |           |               |          |           |              |
|-------------|------------------------------------------------------------------------------------------|--------------|-----------|---------------|----------|-----------|--------------|
| miR-199b-5p | AGPAT9                                                                                   | C7orf57      | FAM206A   | WDR78         | LCA5L    | PFN2      | AGPAT5       |
|             | LCLAT1                                                                                   | C12orf75     | DYNLL1    | IFT43         | TTC39A   | ECT2      | C10orf115    |
|             | MACC1                                                                                    | C2orf73      | WDR54     | TLCD1         | PECR     | IQCK      | LINC00332    |
|             | C7orf63                                                                                  | FAM167A      | LINC00589 | DYNLT1        | LIPH     | PLEKHB1   | TMEM254      |
|             | IFT80                                                                                    | MRAP2        | GIPC2     | CEP41         | CEP19    | CPPED1    | FMN1         |
|             | STMND1                                                                                   | B3GNT7       | C3orf67   | VPS25         | TDRD7    | LINC01171 | SIGLEC9      |
|             | KBTBD4                                                                                   | ARPC3        | CMPK2     | B3GNT5        | RPGR     | CCDC39    | HK3          |
|             | SMS                                                                                      | F2RL1        | TCP11L2   | LRRC6         | ARL13B   | KIF27     | KLHL2        |
|             | SMIM14                                                                                   | CCDC138      | PIFO      | DNAL1         | RPGRIP1L | TBC1D31   | FGFBP2       |
|             | C1orf189                                                                                 | CEP97        | SYNPR-AS1 | FAM166B       | ZC2HC1C  | STOX1     | GJB7         |
|             | ZNF487                                                                                   | GRM5         | SLC2A12   | <b>AGTRAP</b> | PELI1    | ARL3      | C4orf19      |
|             | EFCAB1                                                                                   | NME9         | GALNT7    | ENKUR         | WDR63    | SMKR1     | <b>RNF11</b> |
|             | C2orf70                                                                                  | TBC1D8B      | SAMD9     | WDR31         | HIBADH   | ROPN1L    | CLDN16       |
|             | C5orf49                                                                                  | MXD1         | TTC29     | HSPB11        | RNF141   | DPCD      | S100P        |
|             | C16orf80                                                                                 | PLS1         | ANKRD66   | IQCG          | TMEM231  | CDK7      | PFDN6        |
|             | KLHDC7A                                                                                  | SLC27A2      | MORN3     | DYDC1         | PACRG    | TUBB2A    | LINC01031    |
|             | SNX7                                                                                     | TP53RK       | DYDC2     | UEVLD         | CCDC11   | MRPS31    | FAM183A      |
|             | TMEM232                                                                                  | DYX1C1       | EIF2S2P4  | TMF1          | TAX1BP1  | LRRC59    | SYAP1        |
|             | HS6ST2                                                                                   | FAM47E       | SOX9      | <b>SNTB1</b>  | CDC14A   | ABCB10    | AHSA1        |
|             | ARHGAP18                                                                                 | OMA1         | C17orf97  | RBM24         | C9orf66  | AGBL1     | PYGL         |
|             | CDKL4                                                                                    | NHLRC4       | RTDR1     | POC1B         | EDEM3    | CD164     | PEX7         |
|             | SNTN                                                                                     | SQLE         | NPHP1     | TBCA          | ADIPOR1  | ABHD17B   | NEK11        |
|             | CASC2                                                                                    | SLC22A4      | TC2N      | TEX21P        | SCIN     | CCP110    | LAMTOR2      |
|             | MICALCL                                                                                  | ZMPSTE24     | LCA5      | LILRA1        | DZIP3    | B9D1      | HSDL2        |
|             | DAW1                                                                                     | ARMC3        | UBXN10    | CAPSL         | AGPS     | TOMM34    | GLB1L        |
|             | TRMT1L                                                                                   | EIF1B        | ANXA2P2   | LINC00948     | FOCAD    | TMPRSS2   | RAET1E       |
|             | GMDS                                                                                     | SOX2-OT      | SPOPL     | DYNC2LI1      | FAM201A  | ABCD3     | CD59         |
|             | ANKRD42                                                                                  | KCNE3        | ANKUB1    | HSPH1         | GLB1L2   | MAP3K19   | CCDC173      |
|             | NEBL                                                                                     | ADGB         | EID2      | KIAA0825      | ZNF396   | CXorf30   | KLHL32       |
|             | CCT2                                                                                     | SYTL3        | DUSP14    | DYNLL1-AS1    | PTBP3    | WRAP53    | CCDC153      |
|             | TUSC2                                                                                    | DALRD3       | SLAIN2    | CCDC96        | PPM1H    | KPNA3     | EFHB         |
|             | AZIN1                                                                                    | FGF14        | FBXO15    | IBSP          | CCDC104  | FAM96B    | KRT80        |
|             | CXorf22                                                                                  | HSP90AA1     | CCDC170   | SETD9         | SYTL5    | EPPIN     | ALS2CR12     |
|             | MTMR2                                                                                    | HEATR5A      | RNF6      | FBXW9         | RSPH4A   | IQCH      | HRK          |
|             | BCL2L1                                                                                   | WDR49        | ARMC2     | SLC9C2        | PLCH1    | C9orf24   | KIF3A        |
|             | STPG1                                                                                    | FAM104B      | WWC1      | RAB11FIP4     | C9orf43  | GLRX5     | NME7         |
|             | BASP1                                                                                    | PRICKLE2-AS3 | COX17     | CRY1          | MCAT     | TSPAN3    | TMEM67       |
|             | RSAD2                                                                                    | KPNA7        | NCF1      | CYB5D1        | CD164L2  | PLEKHG7   | ZBBX         |
|             | GTF2E2                                                                                   | HIST2H2BF    | GDE1      | CENPM         | FAIM     | C22orf15  | AK9          |
|             | KIF6                                                                                     | FAM81B       | CCDC113   | CNOT11        | SLFN13   | WDR65     | UBL3         |

**Supplementary table S3 continued**

| miRNA              | Negatively correlated asthma-associated genes<br>(bold = validated target gene of miRNA) |           |          |            |          |           |           |
|--------------------|------------------------------------------------------------------------------------------|-----------|----------|------------|----------|-----------|-----------|
| <b>miR-199b-5p</b> | KIF24                                                                                    | ECT2L     | CPEB4    | RUVBL1     | CALM2    | DNAL4     | IFLTD1    |
|                    | STS                                                                                      | KIAA1009  | UGP2     | TCTN2      | CR1L     | KDM1B     | SESTD1    |
|                    | NCEH1                                                                                    | DRC1      | GALNT1   | RAB3IP     | STOML3   | KIAA1407  | PTGES3    |
|                    | TCEB2                                                                                    | RFX3      | POLR2I   | EBNA1BP2   | TPST1    | TSG101    | AP1M2     |
|                    | KIF9                                                                                     | SLC44A4   | UBB      | PZP        | APOBEC4  | ACSBG1    | MAPK8IP1  |
|                    | LRP2BP                                                                                   | CAT       | SPATA18  | SRGAP3-AS2 | WDR19    | MKRN1     | EGLN3     |
|                    | MORF4L2                                                                                  | ATPIF1    | PLAC8    | TTC25      | TCTN1    | TNFAIP8L1 | C4orf47   |
|                    | UNC119B                                                                                  | SLC37A3   | AXDND1   | FAM216B    | SHFM1    | SSB       | STYK1     |
|                    | SMEK2                                                                                    | C1orf192  | DIO1     | MPP1       | CNGA4    | C20orf26  | ANKDD1B   |
|                    | C10orf67                                                                                 | LRP11     | PPP4R4   | CHDC2      | RSPH3    | STYXL1    | BCCIP     |
|                    | C7orf73                                                                                  | HSPA4L    | PPID     | STK33      | S100A11  | SLC25A14  | MAPK10    |
|                    | TSNAXIP1                                                                                 | CIB1      | RGS22    | CSNK1G1    | NCF1B    | PCYT1B    | CGREF1    |
|                    | DNAJC16                                                                                  | FBXL13    | BBS7     | RBM20      | MEAF6    | TRIM37    | MPP7      |
|                    | TMEM212                                                                                  | EHHADH    | UBE3D    | ABCC6P1    | FAM154B  | DPY19L2P2 | TTC8      |
|                    | MFSD6                                                                                    | COPB2     | ARMC4    | CCDC74A    | WDR35    | SERPINB1  | CCDC41    |
|                    | GOLPH3L                                                                                  | LINC00284 | CDCP1    | PPP1R7     | TLR1     | VEPH1     | DDO       |
|                    | BCL2A1                                                                                   | FOXA2     | MKX      | TSPAN6     | DNAJC12  | NDUFB3    | IL1B      |
|                    | HCK                                                                                      | C1GALT1C1 | MPC2     | COMMD8     | NAMPTL   | CNTF      | NUS1P1    |
|                    | LY75                                                                                     | MSMO1     | DBI      | MAD2L1     | GMPR     | C1orf141  | ACSL1     |
|                    | DPY30                                                                                    | C11orf74  | TRMT10A  | UBE2D1     | FAM173B  | VRK1      | PLBD1     |
|                    | DNMBP-AS1                                                                                | CCDC110   | MUC15    | BANK1      | CXXC4    | C1D       | UQCR10    |
|                    | MRPL40                                                                                   | GOLM1     | NDUFA1   | TFF1       | C21orf59 | TEX26     | ZBED5-AS1 |
|                    | HSBP1                                                                                    | C6orf99   | C17orf58 | TMEM144    | CD38     | ICAM3     | NAMPT     |
|                    | TMEM70                                                                                   | CCDC67    | BIK      | COX16      | C19orf38 | HIST3H2A  | NLRC4     |
|                    | PNP                                                                                      | HSF2      | HIGD1A   | ROMO1      | CETN3    | NUDT16P1  | CHMP5     |
|                    | BOLA3                                                                                    | RGCC      | PLEKHB2  | TWF1       | CCDC28A  | JKAMP     | FASTKD3   |
|                    | C20orf195                                                                                | TPMT      | PDIA4    | CP         | B3GNT3   | MAP9      | LINC00326 |
|                    | GTF3C6                                                                                   | AQP4      | SLMO2    | CEACAM6    | VNN1     | NOP10     | TAF13     |
|                    | YIPF5                                                                                    | PSMD10    | CASP7    | CDK5       | CHMP2B   | EPB42     | COA3      |
|                    | MTMR6                                                                                    | PRKAR1A   | CMPK1    | SLC35A2    | PSMD14   | SLC43A2   | MRPS35    |
|                    | NDUFAB1                                                                                  | ISCA2     | JAGN1    | PAPSS1     | UBL5     | SLC35A3   | ABHD3     |
|                    | PNMA1                                                                                    | ANG       | GGCT     | VNN3       | PPIL1    | PPP1R36   | SLC22A16  |
|                    | ATP6V1G1                                                                                 | C2orf40   | CYB5R4   | SRI        | TWF1P1   | NDUFB1    | CHCHD2    |
|                    | NOXRED1                                                                                  | FANCF     | HCG14    | DHRS7B     | PROS1    | CCNB1     | DYNLT3    |
|                    | ERH                                                                                      | TMEM66    | NMI      | IFT46      | PSPH     | FBXO8     | PPP1CB    |
|                    | LRRC63                                                                                   | KCNK1     | TXNDC12  | SCP2       | UGCG     | SLC1A2    | KLHL13    |
|                    | PGGT1B                                                                                   | C1orf168  | AP1S3    | RNFT2      | TOMM22   | CHUK      | SNX3      |
|                    | IARS2                                                                                    | C9orf135  | COX5A    | HNF1B      | ETNK1    | LIG4      | MIR34C    |
|                    | VDAC3                                                                                    | CASP8     | DUSP10   | GCLM       | RTN4IP1  | JRKL      | BTBD1     |
|                    | ATG5                                                                                     | MRPL44    | FZD3     | SPATA24    | GYG2     | JTB       | TMEM68    |

**Supplementary table S3 continued**

| miRNA              | Negatively correlated asthma-associated genes<br>(bold = validated target gene of miRNA) |           |           |            |            |          |           |
|--------------------|------------------------------------------------------------------------------------------|-----------|-----------|------------|------------|----------|-----------|
| <b>miR-199b-5p</b> | TMEM17                                                                                   | ARF4      | RRAD      | SLC36A4    | WDR86-AS1  | TMEM41B  | PLCL2     |
|                    | NDUFC1                                                                                   | KIAA2022  | PRR13     | TIMM23     | FAM177B    | PSMB3    | PRPS1     |
|                    | CRNDE                                                                                    | ERBB4     | TXLNB     | ZNF295-AS1 | VTA1       | C5orf22  | RNF2      |
|                    | TIMM8B                                                                                   | OAS1      | GNAI3     | PNPLA8     | TTC33      | ADAMDEC1 | NEIL3     |
|                    | LSMD1                                                                                    | BLVRA     | COPS8     | ATP6V1A    | AKIRIN1    | OST4     | SDCBP     |
|                    | SH3BGR12                                                                                 | HIST3H2BB | MED18     | PTPLAD2    | FAM227B    | G3BP2    | DPY19L1   |
|                    | PARP15                                                                                   | NAALADL2  | USP18     | HTATIP2    | H2AFJ      | SCAMP1   | ERO1L     |
|                    | ZNF627                                                                                   | GPX1      | TDP1      | ENOPH1     | LIMS1      | MAPK6    | RIBC2     |
|                    | CMAHP                                                                                    | RPAP3     | SOCS4     | STAM2      | SP140      | PNPLA4   | BLOC1S2   |
|                    | CDK8                                                                                     | MTM1      | TUBBP5    | CLCN3      | C5orf30    | BROX     | RHOTB1    |
|                    | CDC42                                                                                    | GOLPH3    | C2orf69   | NUBPL      | PARK7      | MTPN     | MARCKS    |
|                    | PPM1E                                                                                    | STK16     | PPP4R2    | IBTK       | MARCH3     | NUCB2    | JAZF1     |
|                    | ANKRD37                                                                                  | PWP1      | POF1B     | FAM221A    |            |          |           |
| <b>miR-223-3p</b>  | EPAH7                                                                                    | GREM2     | CCBE1     | DIRAS3     | PROX1      | TMEM119  | OMD       |
|                    | GSTA2                                                                                    | RSPO1     | PCDH10    | TMEM100    | SOSTDC1    | TREM2    | AJAP1     |
|                    | PDGFRA                                                                                   | FAM180A   | CDH2      | LSAMP      | CYP1B1-AS1 | CCDC152  | SCN7A     |
|                    | FGF10-AS1                                                                                | AKR1C3    | FAT3      | SFRP2      | MAMDC2     | ISM1     | TRHDE     |
|                    | OLFML3                                                                                   | ROBO2     | LRP1B     | CLDN8      | ATRNL1     | ADH1B    | AOX1      |
|                    | C11orf1                                                                                  | LUM       | CES1      | GSTA1      | IGFBP6     | CADM2    | SV2A      |
|                    | FGF10                                                                                    | IGSF1     | PHEX      | EDAR       | C17orf58   | PRDM6    | ALDH1A1   |
|                    | DOK6                                                                                     | CALCA     | TENM3     | SCN3A      | AQP4       | AKR1C2   | RWDD4P2   |
|                    | LINC00086                                                                                | SRPX      | NRCAM     | WNT5A      | CLMP       | CYP1B1   | CBR1      |
|                    | TMEM132C                                                                                 | FKBP7     | KIF5C     | KIF1A      | SCN2B      | ADRB1    | INMT      |
|                    | CORIN                                                                                    | KIAA2022  | TPH1      | SEPP1      | PMP2       | RECK     | LGR5      |
|                    | CHGA                                                                                     | OSER1-AS1 | BMP4      | DKK3       | FREM1      | CXCL14   | SPON1     |
|                    | NDST4                                                                                    | FBLN1     | OR51E1    | ABCA8      | TRIM16L    | ADAMTS5  | BOLA3     |
|                    | NLGN1                                                                                    | RGN       | FKBPL     | KIT        | TMEM70     | RAB9A    | AGPAT9    |
|                    | BHLHE41                                                                                  | ASNA1     | SCGB2A1   | DNASE1L3   | SLC2A12    | TMEM86A  | ADCYAP1R1 |
|                    | KBTBD11                                                                                  | NQO1      | ABCG2     | NR2F1      | GSTM5      | GCLM     | RWDD4     |
|                    | PEX7                                                                                     | PCDH19    | NR2F1-AS1 | GBP6       | B3GALT2    | CETN3    | SLC1A7    |
|                    | GLO1                                                                                     | PID1      | TNN       | ARRDC4     | PTPRD      | PRDX1    | SOD1      |
|                    | PCSK2                                                                                    | CACNA1G   | TMEM176A  | EIF5AL1    | MTTP       | AKR1B10  | MMP16     |
|                    | COPG2                                                                                    | IGF1      | ABI3BP    | LINC00908  | CCDC121    | SFRP5    | RYS1      |
|                    | PDCL3                                                                                    | PKIB      | CACNA2D3  | SSTR1      | NUDT16P1   | MUC15    | RPL10AP6  |
|                    | CCL11                                                                                    | RFX8      | GCLC      | TMEM255A   | PKMP3      | HSPE1    | MAD2L1    |
|                    | HINT2                                                                                    | ASPA      | GUCY1A3   | USP51      | LINC00087  | SGCE     | PCBD1     |
|                    | RAB38                                                                                    | ACSS3     | LINC00623 | HCG11      | RRM1       | MPC2     | FTH1P2    |
|                    | NDUFA8                                                                                   | C5orf30   | TMEM45B   | SNRPC      | ZNF540     | SLC7A14  | OLFML1    |
|                    | FAM69A                                                                                   | SOWAHB    | MRPL13    | SLC26A9    | PPP1R1A    | GPX2     | LRRMT4    |
|                    | C1S                                                                                      | RPSAP15   | FZD10-AS1 | GLRX2      | ARL3       | PGRMC1   | HTR7      |



**Supplementary table S3 continued**

| miRNA             | Negatively correlated asthma-associated genes<br>(bold = validated target gene of miRNA) |           |          |              |             |          |          |
|-------------------|------------------------------------------------------------------------------------------|-----------|----------|--------------|-------------|----------|----------|
| <b>miR-223-3p</b> | FGF13                                                                                    | BDH2      | ERH      | BMP5         | HS6ST2      | HMGN5    | UBL3     |
|                   | ABHD6                                                                                    | ST13P10   | FBLN2    | RPSAP58      | TMEM59      | MRPS9    | CAPN9    |
|                   | PLA2G5                                                                                   | KLHL13    | EPHX1    | YIPF5        | VDAC3       | FOPNL    | PHYH     |
|                   | MRPS36                                                                                   | ANXA2P2   | LZIC     | NKD2         | PERP        | MRPL36   | C6orf57  |
|                   | NAA20                                                                                    | OLFML2B   | HTATIP2  | CHMP5        | DYNLT3      | SNRNP25  | MRAP2    |
|                   | CTSK                                                                                     | CDH11     | PFN2     | SLC25A24     | CXorf57     | IL20RA   | RAB30    |
|                   | FAM3C                                                                                    | CAT       | PTGR1    | UCHL1        | SAP18       | HSDL2    | MRPL47   |
|                   | LRP4                                                                                     | GHR       | C1QBP    | <b>MSMO1</b> | STRAP       | ANG      | AR       |
|                   | ENOPH1                                                                                   | SMKR1     | MRPL40   | CD163L1      | CD24P4      | DAD1     | TRMT10A  |
|                   | SCAMP1                                                                                   | C1GALT1C1 | ACADM    | LPHN2        | LRP11       | NDUFAB1  | SERPINB7 |
|                   | EID2                                                                                     | FAM96A    | CYB5R1   | SLC16A9      | EDNRA       | KATNAL1  | FAM105A  |
|                   | PSMD10                                                                                   | ISM1-AS1  | PRTFDC1  | PPID         | VSTM2L      | MLF1     | PKIA     |
|                   | CACNA2D4                                                                                 | FBXO8     | ISOC1    | TOMM22       | TGFA        | SYT1     | MOSPD1   |
|                   | HMGB1P5                                                                                  | ABHD17B   | FBXO45   | TMEM38A      | AKR7A2      | RRM2B    | SLU7     |
|                   | COX6A1                                                                                   | CPSF2     | RPA3     | SETD9        | EPRS        | TP53RK   | GPN3     |
|                   | SCG5                                                                                     | HGF       | BCAS2    | PSMB1        | PIK3R1      | WIBG     | RRAGA    |
|                   | RRAGC                                                                                    | ZDHHC15   | NSMCE1   | MUSK         | PAPSS1      | PPAP2B   | FAM115C  |
|                   | STK16                                                                                    | AP1M2     | KLHDC9   | BLVRA        | COLEC12     | ABHD2    | TBPL1    |
|                   | ITM2A                                                                                    | CCDC28A   | ARHGAP42 | POLR3K       | VAMP7       | SGIP1    | ING2     |
|                   | COX16                                                                                    | MRPS7     | RAB2A    | ADSS         | COL6A3      | ALCAM    | ENPP4    |
|                   | SDHB                                                                                     | OR7E47P   | CHCHD5   | GSR          | SLC30A9     | ABCA4    | SLC30A5  |
|                   | UQCR10                                                                                   | TRMT1L    | TXN      | NAT1         | MRPS35      | TSPAN6   | COL5A2   |
|                   | HIGD1A                                                                                   | C11orf45  | COL1A2   | THAP10       | <b>TWF1</b> | TXNRD1   | COMMD8   |
|                   | CSRNP3                                                                                   | LGR6      | CD9      | TIMM10B      | KLHL7       | TSPAN1   | CAPNS1   |
|                   | MIR181A1HG                                                                               | TMBIM6    | BTF3L4   | NSDHL        | CXXC4       | WDR72    | CYP1A1   |
|                   | VTA1                                                                                     | UEVLD     | DSC3     | ZMPSTE24     | PARK7       | CDKN2B   | RNF175   |
|                   | TMEM194A                                                                                 | HMGN3-AS1 | DNM3OS   | HNMT         | HMGCR       | DNTTIP2  | SCN9A    |
|                   | HAUS2                                                                                    | TMEM66    | GTF2B    | DHX40        | FAM104B     | MTX2     | CMAS     |
|                   | YWHAQ                                                                                    | TMED2     | CMTM6    | AHRR         | COX5B       | NDUFS5   | TUSC3    |
|                   | SRI                                                                                      | AXIN2     | LGALS3   | ZBTB33       | SYBU        | NARS     | FAM198A  |
|                   | SNTB1                                                                                    | SCCPDH    | GSTP1    | RRAGD        | FAT4        | UBL5     | PRMT6    |
|                   | PSMC2                                                                                    | NDUFB3    | FGF14    | CD164        | BLOC1S2     | MOCS3    | UQCRQ    |
|                   | SCRN1                                                                                    | TTC30B    | NDUFA5   | TOMM34       | TMEM218     | P4HA2    | TTC8     |
|                   | NUBPL                                                                                    | RAB4A     | PDGFC    | TSTD1        | HAT1        | DDO      | HES2     |
|                   | C15orf65                                                                                 | RPP40     | FKBP4    | SNORD108     | SCP2        | ZBTB7C   | ZNF33B   |
|                   | DIO3OS                                                                                   | DLAT      | SOWAHC   | SLC35A2      | ANXA7       | NRP1     | MDH2     |
|                   | IDH1                                                                                     | GSKIP     | TSG101   | SLC9A2       | FAM66C      | CHST9    | USP46    |
|                   | C1D                                                                                      | ENPP5     | BRCC3    | SGK3         | RPSAP54     | TMCO1    | MTCH2    |
|                   | COG6                                                                                     | MRPS10    | RNF2     | AAED1        | CCDC25      | ATP6V1G1 | FRG1     |
|                   | NUDT15                                                                                   | NUCB2     | PIGX     | PAAF1        | TTC39A      | SAP30    | MTMR6    |

Supplementary table S3 continued

| miRNA      | Negatively correlated asthma-associated genes<br>(bold = validated target gene of miRNA) |           |             |               |         |           |                |
|------------|------------------------------------------------------------------------------------------|-----------|-------------|---------------|---------|-----------|----------------|
| miR-223-3p | PLS1                                                                                     | GSTA3     | ABCA6       | A2M           | COX5A   | CLDN11    | SMIM14         |
|            | FAM20B                                                                                   | SUMO1     | <b>WASL</b> | NDUFA1        | PCDH9   | MEAF6     | GALC           |
|            | PALM2                                                                                    | HMGB2     | MARVELD1    | TM9SF2        | MAP9    | TTC33     | KCMF1          |
|            | PCDH9                                                                                    | MEAF6     | GALC        | PALM2         | HMGB2   | MARVELD1  | TM9SF2         |
|            | MAP9                                                                                     | TTC33     | KCMF1       | THSD4         | TMEM50A | PDGFA     | MYCBP          |
|            | UBE2N                                                                                    | ATPIF1    | FAM84A      | MOB1B         | MAL2    | HSBP1     | TPMT           |
|            | HNRNPH2                                                                                  | TIPARP    | SPR         | KIFAP3        | HILPDA  | TFPI      | SYPL1          |
|            | MYLIP                                                                                    | DGKE      | PRPS1       | DNMBP-AS1     | BTBD1   | NOP10     | <b>ARTN</b>    |
|            | COL13A1                                                                                  | ISCA2     | BRI3BP      | CCNDBP1       | ARL13B  | ELOVL6    | TENM1          |
|            | PPP1R3D                                                                                  | MAP1LC3B  | TAF1B       | S100A6        | COL3A1  | RDH10     | KCTD12         |
|            | TSPAN13                                                                                  | KLHL4     | IPMK        | UGDH          | SRP14   | CEP97     | <b>CDS1</b>    |
|            | ANKMY2                                                                                   | ETNK2     | DUSP14      | SLC16A2       | LYRM7   | CDK7      | UTP18          |
|            | EIF1B                                                                                    | UBE2V2    | MRC2        | SNX3          | ZKSCAN4 | PTGES3    | CHMP2A         |
|            | CEACAM6                                                                                  | COPZ1     | GPR126      | CRNDE         | GNPAT   | PSMD1     | HADH           |
|            | CEBPG                                                                                    | DIMT1     | RCAN3       | ATP6V1F       | PTS     | PTGDS     | HIATL1         |
|            | MPP7                                                                                     | P4HA1     | RMND5A      | <b>CHMP2B</b> | PSMB5   | TP53INP1  | WDR47          |
|            | SH3BGRL2                                                                                 | DPY30     | HMCN1       | YES1          | TIPRL   | CREBL2    | TIMM8B         |
|            | SLC9A9                                                                                   | RPS10P7   | DPP10       | PAIP2         | CASC4   | GGCT      | TMEM68         |
|            | TALDO1                                                                                   | WLS       | IARS2       | CCDC110       | NUFIP1  | PSMD14    | SUMO2          |
|            | PRDX5                                                                                    | COA3      | ARHGAP28    | PRRG4         | FZD3    | FAM172A   | ZFP91          |
|            | MAGED2                                                                                   | C1orf43   | EIF4H       | HSPA4         | PLBD1   | HCG14     | SSB            |
|            | C16orf80                                                                                 | C1R       | AMZ2        | KLHL20        | ALDH1A3 | PWP1      | MIF4GD         |
|            | FAM96B                                                                                   | PPP2CB    | ZNF664      | TMEM30B       | PLA2G16 | BROX      | TMEM144        |
|            | MUC5AC                                                                                   | CALM2     | VPS35       | BLOC1S4       | FANCF   | LSM5      | PPIL1          |
|            | GALNT3                                                                                   | CDK15     | SEMA6D      | KIAA1279      | NEBL    | RHOA      | <b>CAPRIN1</b> |
|            | FAM60A                                                                                   | PPP1CB    | CHCHD2      | LINC00092     | SLC2A1  | AGPS      | DSP            |
|            | NELL1                                                                                    | GTF3C6    | YWHAB       | KDELR2        | FBXO36  | TUBA1A    | CERS6          |
|            | KCTD18                                                                                   | PPP4R4    | NDUFS6      | PCCB          | SLC27A2 | NCKAP1    | VPS25          |
|            | PLAA                                                                                     | PEG3      | TKT         | SESN1         | C5orf22 | CLDN16    | ATP6V1A        |
|            | EPB41L4B                                                                                 | FAM173B   | CTNNA1      | RALBP1        | SNX2    | VPS4B     | FLRT2          |
|            | ICMT                                                                                     | RAET1E    | NAALAD2     | YIPF6         | CMPK1   | NCEH1     | EXPH5          |
|            | CALM1                                                                                    | ZFAND6    | TXNDC12     | ZNF578        | CLPX    | EPB41L2   | ZNF485         |
|            | MORF4L1                                                                                  | TACO1     | PROS1       | ATP5E         | ACOX2   | CCT7      | EMC8           |
|            | SNW1                                                                                     | GAN       | ZDHHC13     | EXTL2         | AZIN1   | PRICKLE1  | NT5DC1         |
|            | ARL1                                                                                     | GTF2E1    | UPK1B       | PAPPA         | PDSS2   | AXL       | LYRM2          |
|            | SUCLG2                                                                                   | UBE2L3    | DRAM2       | ASB7          | SNX7    | FTH1P8    | IFT52          |
|            | CBFB                                                                                     | EDA2R     | BCL2        | NAV3          | MORF4L2 | C11orf74  | COPS8          |
|            | EHHADH                                                                                   | UGT1A6    | TRIM2       | JRKL          | SLCO2B1 | APOO      | ZMAT2          |
|            | ROPN1B                                                                                   | GOLT1A    | HNRNPF      | ACTR6         | NPTN    | GABARAPL2 | HECTD1         |
|            | CCT5                                                                                     | HIST1H2BD | MRPL44      | ZMAT3         | ABI1    | ZBED5-AS1 | PSMB6          |

**Supplementary table S3 continued**

| miRNA             | Negatively correlated asthma-associated genes<br>(bold = validated target gene of miRNA) |           |          |          |              |           |           |
|-------------------|------------------------------------------------------------------------------------------|-----------|----------|----------|--------------|-----------|-----------|
| <b>miR-223-3p</b> | CCT5                                                                                     | HIST1H2BD | MRPL44   | ZMAT3    | ABI1         | ZBED5-AS1 | PSMB6     |
|                   | ANXA2                                                                                    | H3F3AP4   | MTM1     | DYNLT1   | SLC35A3      | DYNLL1    | KCNMB2    |
|                   | GOT2                                                                                     | DNPH1     | BBS12    | RNF138   | COX6B1       | RTFDC1    | LIPH      |
|                   | SMAD2                                                                                    | PPP6C     | STARD13  | UGT1A8   | ZMYND12      | PTPRN2    | FREM2     |
|                   | SLC25A4                                                                                  | MCM4      | DYNC1LI1 | GLCE     | METTL15      | BAG5      | NME5      |
|                   | PKHD1L1                                                                                  | CMTM4     | CAB39    | GLOD4    | EPT1         | NDUFC1    | NTAN1     |
|                   | GTF3A                                                                                    | PANK3     | MAP3K2   | ATP6V1H  | <b>ARL8B</b> | SOX2-OT   | GEMIN8P4  |
|                   | MRPL42                                                                                   | TPRG1L    | SERTAD2  | SHFM1    | PSMB3        | TCP1      | LRR37A6P  |
|                   | AP1AR                                                                                    | TRIM16    | FAHD1    | VEZF1    | BRD7         | PSMA5     | LRR32     |
|                   | ABCD3                                                                                    | ZNF772    | ZNF665   | ATP6V1D  | L3MBTL3      | EMP2      | ZNF354C   |
|                   | BIRC6-AS1                                                                                | COMMD7    | RTCB     | ARF5     | SLMO2        | PPP2R5E   | JKAMP     |
|                   | ALKBH3-AS1                                                                               | LZTFL1    | ARFIP1   | ZNF677   | ZC3H12B      | MORF4L1P1 | TWF1P1    |
|                   | PIGT                                                                                     | TRAM1L1   | MUCL1    | KCNMB4   | SH3RF1       | LINC00667 | VDAC1     |
|                   | CLIC1                                                                                    | SOX21-AS1 | ISCA1    | PSMD4    | SKP1         | ZNF28     | TMEM41B   |
|                   | C6orf123                                                                                 | FCF1      | CCNB1IP1 | DNAJB4   | RAD23B       | RGCC      | SPRY2     |
|                   | AADAC                                                                                    | C8orf47   | UBE2K    | MEST     | CDC5L        | TUSC2     | PGD       |
|                   | DHRS9                                                                                    | SNRPD3    | RFK      | ZNF614   | CETN2        | ACBD3     | TLN2      |
|                   | FAM174A                                                                                  | HIBADH    | BCL7A    | RAB11A   | ZNF627       | APLF      | LIN54     |
|                   | KCNIP3                                                                                   | POLR2B    | KLF5     | WBSCR16  | ANKRD66      | FBXO17    | MSH2      |
|                   | SLC47A2                                                                                  | UQCRRS1   | HMGCLL1  | TMEM18   | FASTKD3      | DAZAP2    | F2RL1     |
|                   | CLTA                                                                                     | ANXA1     | DARS2    | SNAPC5   | HSF2         | SOCS4     | RPL23AP82 |
|                   | AAGAB                                                                                    | KIF5B     | FRAS1    | SERPINB5 | SPRY1        | DYNLRB2   | SORT1     |
|                   | FBXO28                                                                                   | AGR2      | PRKCA    | PSMD6    | ADAM33       | ERLIN1    | MAGI3     |
|                   | ADSSL1                                                                                   | ARCNI     | IMPAD1   | LCORL    | CTTNBP2      | NUS1      | OBFC1     |
|                   | TTC30A                                                                                   | HSPB11    | ZC2HC1A  | SLAIN2   | DUSP19       | LAMTOR5   | UBE2M     |
|                   | CDK5                                                                                     | ZNF285    | FAM206A  | ROMO1    | UBE2A        | HMGN3     | SDR16C5   |
|                   | EMC3                                                                                     | RNF6      | EIF4A3   | PPAP2A   | SPTY2D1      | BAI3      | WRB       |
|                   | SLC20A2                                                                                  | MERTK     | CUL3     | EBNA1BP2 | EPCAM        | SLC17A5   | EZR       |
|                   | PGGT1B                                                                                   | AP3M2     | MBNL2    | METTL21B | PROX2        | SPPL2A    | IBTK      |
|                   | ERBB3                                                                                    | CD59      | C2orf44  | JAGN1    | FAM169A      | C1orf54   | GOLGA5    |
|                   | DYNC2LI1                                                                                 | KIAA1430  | POU3F1   | FOXRED2  | ARIH1        | G3BP2     | SLC5A7    |
|                   | CIPC                                                                                     | HAUS3     | EVI5     | RALGPS2  | CLTC         | PDCD1LG2  | COPRS     |
|                   | DYNC1I2                                                                                  | KCNB1     | RMI1     | WEE1     | FMO3         | BZW2      | GFRA2     |
|                   | ATG4A                                                                                    | IGFBP2    | BLVRB    | RASSF6   | COX14        | TAF13     | MTIF3     |
|                   | GLMN                                                                                     | PGM2      | ALKBH5   | RAB25    | ABCB10       | CCNC      | ENOX1     |
|                   | KBTBD4                                                                                   | ATG3      | PIGH     | AGPAT5   | CCT6A        | ARPC3     | HADHA     |
|                   | POF1B                                                                                    | UBE2H     | NDUFS1   | BANF1    | KIAA1161     | TIMM23    | PDCD6IP   |
|                   | RPF2                                                                                     | VAMP8     | RNF11    | PDE11A   | C5orf15      | DBI       | C2orf69   |
|                   | NDUFB10                                                                                  | GRIK2     | BBS7     | ARL6     | HSD17B11     | MAGED1    | PA2G4     |
|                   | KLHL32                                                                                   | ITGB8     | RALA     | MAPK6    | GALNT1       | DPY19L1   | KLHDC8B   |

**Supplementary table S3 continued**

| miRNA             | Negatively correlated asthma-associated genes<br>(bold = validated target gene of miRNA) |          |           |             |          |           |           |
|-------------------|------------------------------------------------------------------------------------------|----------|-----------|-------------|----------|-----------|-----------|
| <b>miR-223-3p</b> | CCT3                                                                                     | IDE      | DACT2     | AMIGO1      | CTSF     | FGD5-AS1  | SLC25A12  |
|                   | NUGGC                                                                                    | RALB     | TEAD1     | BCAS1       | UFC1     | JMY       | TTC9      |
|                   | DYNLRB1                                                                                  | MORN2    | GALNT5    | ZFYVE21     | GNAI3    | AKAP3     | SBNO1     |
|                   | THRB                                                                                     | C7orf73  | CHMP4B    | DACH1       | MARCKS   | ANKEF1    | MBOAT2    |
|                   | CCNA2                                                                                    | PAG1     | TBCA      | C2orf40     | ENO4     | STYK1     | EHBP1     |
|                   | PAWR                                                                                     | ZNF302   | S100A10   | RAB34       | PNPLA8   | MRPL18    | RAB10     |
|                   | UBE2E3                                                                                   | TSPAN15  | ADAT2     | BUD31       | RND2     | FAM227B   | SFTA1P    |
|                   | DHRS7B                                                                                   | DNAJC27  | ZNF530    | KLHL8       | OGFOD2   | AMPD1     | ATP9A     |
|                   | PPP2CA                                                                                   | GBAS     | FILIP1    | LINC00517   | SIAH2    | CLCN3     | DPH3      |
|                   | C15orf56                                                                                 | CFH      | KLHL5     | ULK2        | COX8A    | OCLN      | ZNF311    |
|                   | IRAK1BP1                                                                                 | RPP38    | MRPL51    | SMEK2       | RNF20    | PRKD3     | EFCAB11   |
|                   | ELF1                                                                                     | FXD3     | EXD2      | ATP6AP1     | PEX13    | KLHDC10   | LMO7      |
|                   | PTGES3P1                                                                                 | RNF219   | TCP11L2   | SNTN        | SAMM50   | DCTN4     | COPS6     |
|                   | CD109                                                                                    | NRL      | SLC2A10   | C2orf73     | HSPA4L   | KPNA4     | RYBP      |
|                   | DCP1B                                                                                    | VAPA     | NAA35     | KTN1        | CAP2     | PRKAR2A   | ZNF14     |
|                   | CPEB1                                                                                    | GDF9     | LCA5      | LRTOMT      | SOX2     | CDC42     | DCUN1D1   |
|                   | AEBP2                                                                                    | SFMBT1   | SMS       | ZNF529      | ACPP     | ALDH3B2   | ENSA      |
|                   | TUBA1C                                                                                   | RLIM     | SUDS3     | ACSM3       | PDP2     | PI4K2B    | BBS4      |
|                   | FAM114A1                                                                                 | ZNF471   | VRK1      | ADAM10      | NAALADL2 | VSIG2     | PSMD2     |
|                   | FAIM                                                                                     | STAM2    | HSPA1A    | TCEANC2     | EIF4HP1  | DDHD2     | TTC5      |
|                   | NEDD1                                                                                    | ADAM9    | RP2       | RNASEH1-AS1 | PRKAR1A  | IFT46     | FASTKD5   |
|                   | DNAJC18                                                                                  | ATXN7L3B | HOXB6     | RTN4        | MPP5     | XRCC4     | FTH1P7    |
|                   | PIP4K2C                                                                                  | IPP      | C10orf118 | ERP44       | FBXL5    | CDK8      | RRAGB     |
|                   | SCRN3                                                                                    | TFF3     | LXN       | SCEL        | CPEB2    | UGCG      | TSPAN3    |
|                   | PIH1D2                                                                                   | IFT20    | MRPL54    | RFTN2       | RBM24    | NUTF2     | MB        |
|                   | SQLE                                                                                     | STEAP2   | FIS1      | UBE2D1      | CPSF3    | PARG      | TRAPPC8   |
|                   | RNF141                                                                                   | RPL17P11 | CUL5      | TAX1BP1     | CCT2     | UHMK1     | OTUD7B    |
|                   | GEMIN2                                                                                   | CREB3    | NUDT5     | B3GNT5      | CAPZA1   | HSP90AA1  | KPNA3     |
|                   | ZNF45                                                                                    | SEC23B   | MORN5     | GLS2        | HN1L     | SUGT1     | LYRM1     |
|                   | CCDC104                                                                                  | SYTL2    | GFM1      | NDUFB1      | FGFR4    | ZNF106    | YPEL5     |
|                   | BRAP                                                                                     | CCSAP    | DIAPH2    | SAMD8       | TXLNB    | FAM8A4P   | COPA      |
|                   | LSMD1                                                                                    | MRPS34   | PCDHGA4   | NFATC4      | RHOU     | NBR1      | SMARCA5   |
|                   | GPKOW                                                                                    | RB1      | CSF1R     | CNTF        | ZNF221   | RPS6KA3   | JTB       |
|                   | C1orf186                                                                                 | C12orf49 | KIAA0895  | IPO11       | ANXA4    | WDR92     | GPLD1     |
|                   | DNAJC6                                                                                   | AGFG1    | LRRC49    | SLK         | GPX4     | RUVBL1    | SPATA6    |
|                   | DNAJC3                                                                                   | COBL     | SSU72     | UNC119B     | GLA      | UHRF1BP1L | RBM27     |
|                   | PLEKHB2                                                                                  | NIPAL2   | RAB5A     | ATG5        | CTBS     | ESYT2     | FGF14-AS1 |
|                   | RUNX1T1                                                                                  | RAB6A    | LY75      | REPS1       | MTMR2    | PSMC3     | FAM183A   |
|                   | IFT57                                                                                    | COPB2    | MACC1     | ZBTB21      | ZFAND5   | BCL2L13   | MANBAL    |
|                   | PNPLA4                                                                                   | RANBP1   | SDHA      | FOLR2       | CLU      | FAM229B   | RPL4P5    |

**Supplementary table S3 continued**

| miRNA             | Negatively correlated asthma-associated genes<br>(bold = validated target gene of miRNA) |                  |          |             |             |              |          |
|-------------------|------------------------------------------------------------------------------------------|------------------|----------|-------------|-------------|--------------|----------|
| <b>miR-223-3p</b> | EDRF1-AS1                                                                                | SDC4             | PSPH     | PDE7B       | PPP4R2      | <b>PDZD8</b> | GNG5     |
|                   | H2AFJ                                                                                    | STOX1            | XRN2     | TMEM150C    | EIF3EP1     | PRR15L       | CKAP5    |
|                   | SLC37A2                                                                                  | TCP11L1          | PTBP3    | RAB14       | TUFG        | TES          | EXOC8    |
|                   | DYRK2                                                                                    | NAPG             | CDK14    | FAM76A      | MSH3        | BSPRY        | CCDC138  |
|                   | TM4SF1                                                                                   | FAM32A           | INPP4B   | NUP62CL     | CCDC23      | <b>CHUK</b>  | MFSD9    |
|                   | NEURL3                                                                                   | WASF3            | METTL9   | INTS10      | RAC1        | VCP          | PXK      |
|                   | SORCS2                                                                                   | SOAT1            | CD2AP    | NBPF16      | TMCO3       | UGP2         | MRPL37   |
|                   | WDR31                                                                                    | ZNF396           | SULT1C4  | AGR3        | FAM161A     | UBE2B        | TBC1D8B  |
|                   | S100A14                                                                                  | C1orf110         | NME7     | ENAH        | GLTP        | TIPIN        | EIF3C    |
|                   | MARVELD2                                                                                 | DNAJC10          | YWHAZ    | SIX4        | ELK3        | C10orf131    | POLR3F   |
|                   | MRPS31                                                                                   | PARP4            | STRBP    | ADAMTS9-AS2 | SPSB1       | ATP1A1       | ATP8B1   |
|                   | RPN1                                                                                     | GFPT1            | PRSS12   | DHRS4-AS1   | SLC25A13    | MTFR1        | DLG3     |
|                   | VANGL1                                                                                   | PAICS            | SERPINB6 | GPD2        | DAAM1       | MNAT1        | GOLGA6L4 |
|                   | YWHAE                                                                                    | GNS              | DCBLD2   | PAPD5       | TFG         | SEPHS2       | IDS      |
|                   | FLRT3                                                                                    | EXOSC4           | FAM98B   | GLE1        | LSM1        | CSNK2A1      | FAM83D   |
|                   | DENND5B                                                                                  | CTSH             | PALD1    | CLINT1      | TXNL4A      | MAPK1        | HSPA8    |
|                   | SSBP1                                                                                    | C1orf192         | FAM43A   | UBXN10-AS1  | LINC00675   | INTS4L1      | IK       |
|                   | OMA1                                                                                     | SPATA7           | WDR35    | BCCIP       | ARHGAP18    | WDR54        | SPAG9    |
|                   | C11orf95                                                                                 | MIPEP            | C9orf116 | SPCS2P4     | ADH6        | SH3GLB1      | DDHD1    |
|                   | LRIG3                                                                                    | ERGIC3           | RAB7A    | EAF1        | C12orf75    | CDKL2        | CIR1     |
|                   | LARP4                                                                                    | C8orf37          | KDM1B    | PIGU        | RAB1A       | LIG4         | TRIP11   |
|                   | CTNNAL1                                                                                  | C1orf210         | MBP      | SMAD7       | COL21A1     | RAP2C        | EEA1     |
|                   | NR2F6                                                                                    | ZNF57            | ZNF74    | CEP44       | RNASEL      | GNB1         | MRFAP1   |
|                   | GTF3C3                                                                                   | MBD2             | LRRC34   | GDAP2       | DENND2C     | DNAL1        | CSTB     |
|                   | DENND4C                                                                                  | MTURN            | CT62     | NCSTN       | MFSD6       | PHAX         | THAP6    |
|                   | ZNF214                                                                                   | TMPRSS2          | WRNIP1   | GFM2        | UBXN4       | SEC61B       | CA5B     |
|                   | PIWIL4                                                                                   | PRPF19           | TMEM56   | DOCK3       | SGMS2       | ZDHHC5       | GPR180   |
|                   | KCNC1                                                                                    | TARSL2           | UGT8     | KIAA0232    | PRKAR2A-AS1 | TNKS         | RIMKLA   |
|                   | USP7                                                                                     | <b>SECISBP2L</b> | RTN4IP1  | CDH1        | LCLAT1      | AIG1         | PPM1G    |
|                   | STXBP4                                                                                   | PPP1R7           | SLC36A4  | CRY1        | MICU1       | CCNY         | DDX6     |
|                   | ETV1                                                                                     | SRGAP3-AS2       | KHDRBS1  | EFCAB7      | WDR3        | PDK1         | SCYL2    |
|                   | LRBA                                                                                     | PFDN2            | RPAP3    | PPP1R14C    | CLTB        | TRIM36       | CCDC91   |
|                   | EIF3J                                                                                    | TUBB4B           | FER1L6   | GTF3C4      | SLC9A4      | EDEM3        | CAMK1D   |
|                   | ERO1L                                                                                    | FANCE            | RPL26L1  | MED28       | RASAL2      | GLRX3        | UNC13B   |
|                   | UBQLN1                                                                                   | NUDT19           | TACSTD2  | RAD50       | ZNF33A      | TCF12        | FLVCR1   |
|                   | TRAPPC3                                                                                  | ETNK1            | BTBD3    | LAMB1       | MTERFD2     | DNAAF2       | LRP8     |
|                   | PPAP2C                                                                                   | RTCA             | CAST     | RPP14       | EML1        | GOLPH3L      | RABL5    |
|                   | LCOR                                                                                     | F11R             | ARPC1A   | SSNA1       | TMEM17      | KPNB1        | WDR78    |
|                   | PELI1                                                                                    | ZNF649           | FAR1     | C19orf12    | PSMD13      | MAPK10       | PTMA     |
|                   | SYS1                                                                                     | ACBD7            | GFPT2    | CNOT6       | PDIA3P1     | AP1G1        | DAB2     |

**Supplementary table S3 continued**

| miRNA             | Negatively correlated asthma-associated genes<br>(bold = validated target gene of miRNA) |         |            |           |           |           |               |
|-------------------|------------------------------------------------------------------------------------------|---------|------------|-----------|-----------|-----------|---------------|
| <b>miR-223-3p</b> | PSEN1                                                                                    | NUS1P1  | IQGAP1     | C9orf106  | RHBDD2    | MTX1      | CYSTM1        |
|                   | HDHD2                                                                                    | PAK2    | RRP36      | SPINT2    | RAB5B     | SERGEF    | AKIRIN1       |
|                   | TCAIM                                                                                    | GIPC2   | SLC13A3    | CTSC      | AQP4-AS1  | C1orf194  | FAM84B        |
|                   | AHSA1                                                                                    | MREG    | EI24       | FYCO1     | TECR      | SLC43A1   | PAF1          |
|                   | SERF2                                                                                    | ARSE    | STEAP1     | KCTD11    | COPG1     | SLC35B3   | LEAP2         |
|                   | KRAS                                                                                     | C2CD5   | RAB6B      | TTC3      | HK1       | ASXL2     | EGLN3         |
|                   | FAM177A1                                                                                 | MRPL48  | FGF14-IT1  | FBXO11    | STAM      | FAM179B   | PRTG          |
|                   | ALDH3B1                                                                                  | SLC10A5 | UBC        | STX12     | FAM184A   | PPP2R5C   | CDC20         |
|                   | TUBB2A                                                                                   | PLAC8   | TTC26      | CWF19L1   | FAM213B   | GPR160    | PSMB2         |
|                   | ODC1                                                                                     | ZNF573  | SHMT1      | STK24     | SERBP1    | TNFSF15   | GAR1          |
|                   | C5orf49                                                                                  | CAMSAP1 | HIST3H2A   | INTS2     | CALR      | GOLPH3    | DZIP3         |
|                   | C10orf107                                                                                | MIPOL1  | PRDX2      | SPATS2L   | ARFGEF1   | GLIPR1L1  | RNF130        |
|                   | LINC00883                                                                                | IGHG1   | FA2H       | EIF2S2    | AHCTF1    | SPAG7     | <b>ZBTB18</b> |
|                   | ELAVL1                                                                                   | MTPN    | STOML3     | LIMS1     | SRFBP1    | LINC00475 | PTCH1         |
|                   | NAA15                                                                                    | RNF167  | SETMAR     | SNX14     | KCNJ5     | SEC23IP   | SLC35B1       |
|                   | VCPIP1                                                                                   | MAP2K4  | RQCD1      | RSPH4A    | C14orf142 | CCDC90B   | USP8          |
|                   | PIN4                                                                                     | CHIC2   | KLF10      | GALNT7    | DDX52     | ABCA12    | TUBA1B        |
|                   | YWHAG                                                                                    | PPP2R4  | TMEM254    | TRIM13    | LSM4      | TRIM37    | KIF11         |
|                   | NSMAF                                                                                    | RAB27B  | SLC23A2    | TPST1     | STIP1     | MARVELD3  | CERKL         |
|                   | KPNA6                                                                                    | SRPK2   | CCDC160    | HRASLS2   | MID1IP1   | ABAT      | SRP68         |
|                   | FEM1C                                                                                    | STAU1   | HIST1H2BE  | FRK       | RTN3      | PTTG1IP   | HIPK3         |
|                   | OSBPL3                                                                                   | KLHL35  | TMF1       | PPP1CA    | DCAF6     | C9orf85   | HIPK1         |
|                   | EPHA5                                                                                    | RASEF   | SPAG16     | DALRD3    | TET1      | MAP7      | CACUL1        |
|                   | ZNF204P                                                                                  | GOSR1   | IL33       | SYNGR1    | IL22RA1   | BCAR3     | LGALS1        |
|                   | AP3B1                                                                                    | ANKRD16 | TTC39C     | CGNL1     | TBC1D2B   | TPPP3     | ARHGAP32      |
|                   | AFTPH                                                                                    | ETF1    | GRAMD1C    | ITM2C     | RAB20     | BRCA1     | ABHD17C       |
|                   | ZNF227                                                                                   | AIFM2   | ZFP82      | CLCC1     | TBP       | UBB       | HEATR5A       |
|                   | HIST1H2BH                                                                                | DYNC1H1 | THAP3      | TPGS2     | TRIP12    | ZNF141    | OSTF1         |
|                   | TTC19                                                                                    | UBAP1   | CAMK2D     | PNMA1     | VPS41     | TJP2      | CYCS          |
|                   | LRRC59                                                                                   | PABPC4L | HSPA1B     | LINC00094 | GARS      | ACTR2     | CNOT11        |
|                   | WNT9A                                                                                    | NOLC1   | TADA3      | GRIA2     | ESRP1     | DKK1      | PDIA4         |
|                   | MS4A8                                                                                    | TSPYL4  | YPEL2      | CFDP1     | PIBF1     | ALDOA     | ZNF559        |
|                   | MAN1C1                                                                                   | ZFP3    | EIF4G2     | AK7       | MIR155HG  | ATP1B1    | CDHR1         |
|                   | PSMC4                                                                                    | DDB2    | KIF2A      | KDM7A     | DDAH1     | TULP3     | SLC16A10      |
|                   | CHCHD7                                                                                   | LAMTOR2 | TOR3A      | SULT1E1   | GTF2E2    | ACVR1C    | CCL22         |
|                   | LAMC2                                                                                    | RB1CC1  | UXS1       | TFDP1     | RGS13     | CITED2    | C10orf76      |
|                   | SLC44A4                                                                                  | NDUFB7  | SFTA3      | SPRTN     | FLNB      | S100A11   | PPP2R2A       |
|                   | ERI1                                                                                     | TP53BP2 | DCAF16     | LRRIQ3    | ZKSCAN1   | CES2      | LRRC1         |
|                   | <b>NSUN3</b>                                                                             | PRKX    | CDKN2AIPNL | AVEN      | KIF3B     | ABCC3     | TJP1          |
|                   | CCDC181                                                                                  | CCDC39  | SPTLC2     | HMMR      | CNOT1     | GRHL3     | DNAJC16       |

**Supplementary table S3 continued**

| miRNA             | Negatively correlated asthma-associated genes<br>(bold = validated target gene of miRNA) |           |           |           |          |          |           |
|-------------------|------------------------------------------------------------------------------------------|-----------|-----------|-----------|----------|----------|-----------|
| <b>miR-223-3p</b> | MIR34C                                                                                   | DDX21     | YWHAH     | MKX       | TFCP2    | AKIP1    | C11orf88  |
|                   | NBAS                                                                                     | OLFM2     | TCEB2     | ACTR3     | CPEB4    | ERBB2IP  | NRG4      |
|                   | RHOBTB1                                                                                  | CDK1      | SLC16A12  | MTMR12    | ALYREF   | AJUBA    | ARPC5L    |
|                   | PLD3                                                                                     | PSMD12    | HMOX2     | MYO1D     | RAB3IP   | EFCAB2   | CTSV      |
|                   | NEK1                                                                                     | PIP4K2B   | UBE2G1    | IGFBP3    | ENKUR    | PRPF40A  | LINC00467 |
|                   | PKIG                                                                                     | OPA1      | KCTD1     | DAW1      | FTL      | CHMP1B2P | SLC25A42  |
|                   | THRAP3                                                                                   | NEK4      | AGBL3     | GLRX5     | MMACHC   | KLF15    | COLCA2    |
|                   | ARF6                                                                                     | ANXA3     | UNC80     | HSD11B1   | PTPLAD2  | NCOA2    | KHNYN     |
|                   | PIFO                                                                                     | PBRM1     | C18orf25  | GSK3B     | CDH13    | C12orf5  | PHLPP1    |
|                   | XPR1                                                                                     | KLHL2     | NUP50     | NCR3LG1   | DHX32    | MNS1     | STYXL1    |
|                   | MRPL23                                                                                   | ZSCAN12P1 | NDUFA10   | OSBPL11   | PCDHGB6  | GSN      | FAM81B    |
|                   | EFTUD2                                                                                   | TAF5L     | ABHD3     | WDR45B    | UGGT1    | TBC1D32  | C9orf72   |
|                   | PPL                                                                                      | USP12     | SOX21     | MCCC2     | ZIK1     | ANKDD1B  | AKAP14    |
|                   | HNRNPC                                                                                   | CMKLR1    | DHX29     | FAM218A   | MYO5B    | USP6NL   | GAPVD1    |
|                   | POLR2J                                                                                   | FOCAD     | C3orf67   | RFT1      | ATP6V0D1 | CNTD1    | SMYD2     |
|                   | UBXN2A                                                                                   | SIGLEC8   | NPPC      | LMAN2     | SATB1    | COA4     | ZNF345    |
|                   | TRAPPC1                                                                                  | KIAA1549  | LACE1     | TMEM131   | TAB3     | GNAQ     | MCM2      |
|                   | TMEM40                                                                                   | KPNA2     | FIBP      | LRRFIP2   | IL13RA1  | WNT11    | CCDC58    |
|                   | C16orf62                                                                                 | CTBP1-AS2 | AKAP9     | LDLRAD1   | WSB2     | UGT1A2P  | FANCM     |
|                   | GOLGB1                                                                                   | PITPNA    | MARCH6    | PPP1R15B  | ARF1     | TDRD7    | CNTN2     |
|                   | NID2                                                                                     | OAZ1      | STX18     | C9orf69   | LMTK2    | CDC14A   | ZSWIM5    |
|                   | ATP2B1                                                                                   | RIPK4     | HHAT      | GNL2      | PPTC7    | AMY2B    | GPR155    |
|                   | ST6GALNAC2                                                                               | ZNF582    | PACRG     | HIST2H2BE | SLC25A14 | PCDHGA5  | CDC16     |
|                   | SF3B2                                                                                    | KIF3A     | HDLBP     | TTC22     | C12orf60 | SHOC2    | HSD17B13  |
|                   | ARF4                                                                                     | IFT74     | TK2       | SLC23A1   | CCR2     | USP10    | GOLM1     |
|                   | FAN1                                                                                     | EIF4E3    | GALNT12   | STAU2     | ZFYVE16  | PRKDC    | FTOP1     |
|                   | DHX57                                                                                    | CADPS     | ARSJ      | ZNF19     | MXI1     | C6orf106 | ZNF576    |
|                   | KIAA1211L                                                                                | CKLF      | CYB5D1    | ALS2      | UBXN7    | PLIN3    | CLIC6     |
|                   | CCDC6                                                                                    | LAS1L     | PNPT1     | C11orf70  | ZNF577   | CCDC34   | MTSS1     |
|                   | ATP8A1                                                                                   | PDLIM4    | LRRC8B    | KIAA1755  | PCM1     | FBXO16   | PCP4L1    |
|                   | NFX1                                                                                     | PPP1R42   | C14orf93  | SPOPL     | DEFB1    | PECR     | ST3GAL5   |
|                   | ASNS                                                                                     | IQCB1     | RAB28     | C11orf49  | DNAL4    | ZNF682   | ERBB4     |
|                   | RINT1                                                                                    | SAMD12    | TRIM45    | CDY4P     | TNFRSF21 | TMEM125  | DIO1      |
|                   | ANKRD28                                                                                  | SLC29A3   | ATP6V0B   | SS18      | CCDC113  | DNAJA4   | TMOD3     |
|                   | RFWD3                                                                                    | SDCBP     | CHMP1B    | OXTR      | HECA     | IKZF2    | PPP4C     |
|                   | SEPT1                                                                                    | ZFP28     | C1orf141  | ZNF521    | CAPSL    | MIEN1    | SGPP2     |
|                   | BDKRB2                                                                                   | PPP3CC    | GTF3C1    | TC2N      | LARP7    | KIAA1244 | GPR156    |
|                   | ZNF280D                                                                                  | PPP1R11   | SESTD1    | PLEKHA2   | NELFE    | TOB2     | DDI2      |
|                   | PHYHD1                                                                                   | ACLY      | RN7SL648P | CAPN2     | CHRNA9   | NKAP     | IFT80     |
|                   | PPP1R36                                                                                  | C7        | ARHGEF25  | PSMD11    | HEATR3   | ABI2     | CBY1      |

**Supplementary table S3 continued**

| miRNA             | Negatively correlated asthma-associated genes<br>(bold = validated target gene of miRNA) |           |         |            |          |           |            |
|-------------------|------------------------------------------------------------------------------------------|-----------|---------|------------|----------|-----------|------------|
| <b>miR-223-3p</b> | EFCAB10                                                                                  | PREX2     | DNER    | RAD18      | ZNF417   | GPATCH2L  | TMPRSS13   |
|                   | APITD1                                                                                   | HIST3H2BB | EFHC2   | LIFR       | PCID2    | DNAJB2    | MFN1       |
|                   | FBXO15                                                                                   | TOE1      | PCOLCE  | PPP1R14B   | GCC2     | EMP1      | SYAP1      |
|                   | UBQLN2                                                                                   | STOML1    | MMP19   | S100P      | SCNM1    | COX17     | FCGR2B     |
|                   | SLC9B1                                                                                   | MTR       | ZNF274  | CCDC89     | FECH     | ADORA2B   | GDE1       |
|                   | AHNAK2                                                                                   | ARFIP2    | NUFIP2  | PCYT1B     | RPS4XP16 | CHP1      | C15orf26   |
|                   | HOXB-AS2                                                                                 | ERO1LB    | MDM1    | ELOVL5     | LEPREL4  | NCALD     | CSTA       |
|                   | SPATA13                                                                                  | ZNF165    | ZNF445  | KDM5B      | PITHD1   | MICE      | DCDC2      |
|                   | TMEM232                                                                                  | IGSF8     | HNF4G   | HMG20A     | NDRG4    | TRAC      | KIRREL     |
|                   | CASC1                                                                                    | SPA17     | TMEM219 | KCNK1      | POC1B    | NT5C3A    | PPP4R1     |
|                   | TNIK                                                                                     | RALGAPB   | UBR1    | POLD2      | AMMECR1  | PDLIM1    | NPTXR      |
|                   | IPO9                                                                                     | DRG2      | GPRASP1 | OAF        | LRP6     | NUP98     | NRD1       |
|                   | C9orf152                                                                                 | CASP7     | MORC3   | ABCC4      | PIH1D3   | ZC3HAV1   | DRC1       |
|                   | EVC2                                                                                     | SEC14L3   | UBE2R2  | DPCD       | IMMP2L   | PRR15     | MYB        |
|                   | DAPP1                                                                                    | PSMC5     | ZNF549  | SPRYD3     | CDKL1    | ZNF419    | FBLN7      |
|                   | SPATA18                                                                                  | COL4A6    | CORO2B  | FAM216B    | RIOK3    | ARHGAP11A | POT1-AS1   |
|                   | CRHR1-IT1                                                                                | TTBK2     | EXOC4   | DYRK1A     | AMOT     | EIF4G3    | ZNF157     |
|                   | CHD1L                                                                                    | TMCC1     | GRIA3   | ST6GALNAC6 | SLC37A3  | PDLIM5    | C11orf53   |
|                   | PBLD                                                                                     | TOP2A     | FAM120A | S100A16    | ACO2     | DNAJC5B   | IFIT1      |
|                   | PLEKHB1                                                                                  | MAP3K5    | STPG1   | EIF5A      | PSMF1    | SLC9C1    | HHLA2      |
|                   | BAG1                                                                                     | XCR1      | DYNC2H1 | ZDHHC9     | NIPBL    | SCIN      | NUP153     |
|                   | NT5DC3                                                                                   | ANXA11    | RCOR1   | HMG2N2P5   | MAP6     | NPEPPS    | PCYT2      |
|                   | SCAMP2                                                                                   | WBSR22    | HEBP2   | WNT2B      | PFDN6    | RSAD1     | DFNB59     |
|                   | ZNF763                                                                                   | GPBP1     | RFX3    | SMIM22     | YTHDF1   | ABCC9     | TNS3       |
|                   | CCDC170                                                                                  | DAP       | IGHG3   | CEP41      | NBPF24   | RAB1B     | C19orf70   |
|                   | C9orf78                                                                                  | ACER2     | WDR1    | AFAP1L2    | RCBTB2   | HN1       | KHDRBS2    |
|                   | C12orf10                                                                                 | DNAJA1    | RHOD    | GPX1       | SLC38A4  | FAHD2A    | SYTL3      |
|                   | C19orf43                                                                                 | WDR17     | SEMA5A  | ZNF667-AS1 | GALK2    | IDH3A     | LINC00896  |
|                   | SHROOM3                                                                                  | RBKS      | GALNT6  | LCA5L      | LUZP2    | MLEC      | ZNF432     |
|                   | CCDC65                                                                                   | GNE       | RNPEP   | RNF165     | PPFIBP2  | CACHD1    | CXCR6      |
|                   | PLP2                                                                                     | CCDC102B  | RUVBL2  | ANKRD42    | NOXRED1  | TMUB2     | ELMO1-AS1  |
|                   | PAPOLA                                                                                   | VWDE      | TMED11P | BECN1      | CASC2    | C21orf59  | RPL7L1     |
|                   | STX19                                                                                    | SHQ1      | TSPAN9  | H3F3A      | PDCD6    | FANCB     | SLC50A1    |
|                   | IL1R2                                                                                    | MBOAT1    | SSTR2   | HSPH1      | MEG8     | SEPW1     | ATP2B4     |
|                   | ATP8B2                                                                                   | GLB1L     | AGBL5   | TMEM39A    | GSPT1    | PLOD2     | WDR45      |
|                   | LTA4H                                                                                    | CXXC5     | EXOSC6  | ASXL3      | METTTL17 | TDP1      | LRRC4C     |
|                   | UNC93B1                                                                                  | C1QA      | ADIPOR1 | IVNS1ABP   | ZNF551   | SLC22A4   | PAXBP1-AS1 |
|                   | HDGF                                                                                     | CKB       | OSCP1   | ZNF362     | MTMR4    | PPME1     | WHSC1L1    |
|                   | OTUD4                                                                                    | CDIP1     | SCAF11  | TTYH2      | NAB2     | ZNF275    | FMO2       |
|                   | FAM154B                                                                                  | CLOCK     | EVC     | MPZL3      | UBE2Q2P1 | WNK1      | RSG1       |



**Supplementary table S3 continued**

| miRNA       | Negatively correlated asthma-associated genes<br>(bold = validated target gene of miRNA) |              |           |          |           |          |             |
|-------------|------------------------------------------------------------------------------------------|--------------|-----------|----------|-----------|----------|-------------|
| miR-223-3p  | HSPA5                                                                                    | C12orf4      | KRT8      | LPAR6    | ANXA2P1   | CLDN7    | PRODH       |
|             | MID1                                                                                     | FCHSD2       | CCDC153   | SLC9A3R1 | CDKL5     | LHPP     | LYSMD4      |
|             | SLC25A26                                                                                 | CTNND1       | UAP1      | SLC2A9   | C5orf42   | CCDC146  | TSHR        |
|             | C14orf37                                                                                 | TRO          | FSD1L     | RC3H1    | UGT1A4    | PACRGL   | FMN1        |
|             | MAT2A                                                                                    | CLDN4        | DOCK10    | MIAT     | SF3B4     | BDH1     | OSGEP       |
|             | NAP1L4                                                                                   | PRR13        | TUBA4B    | PHTF1    | ZC2HC1C   | WDR19    | OMG         |
|             | LDLRAD4                                                                                  | HIST1H4K     | FAM149A   | TCTN2    | PTPRG     | TEKT1    | UBXN10      |
|             | MCAT                                                                                     | LRRC8A       | ECT2L     | RNF169   | CCDC163P  | AGPAT2   | RNF17       |
|             | BTBD9                                                                                    | ABCA9        | ARFGAP3   | GCNT4    | ZNF267    | SIX1     | IQCH        |
|             | EIF4ENIF1                                                                                | KIAA2018     | CDYL      | SMEK1    | MYO6      | IFT88    | ZFAND4      |
|             | SPATA17                                                                                  | WIPF3        | SMAGP     | SERINC5  | KIAA1958  | FAM126B  | PICALM      |
|             | CCNT2-AS1                                                                                | RN7SKP64     | ZNF232    | PCYT1A   | SRD5A2    | LRIG2    | ECT2        |
|             | MYO1B                                                                                    | CMPK2        | BID       | RHBDL2   | PANK2     | ABCB4    | TBC1D4      |
|             | B3GNT3                                                                                   | C17orf67     | SLC35E1   | EIF2AK2  | ZNF589    | C20orf85 | MYO1E       |
|             | GEMIN4                                                                                   | CFL1         | PMF1      | LAMB2    | TSPAN5    | DUSP22   | LPIN2       |
|             | PSMG3                                                                                    | DLG1         | ZKSCAN7   | MIR645   | LETMD1    | MT1E     | BPGM        |
|             | VPS52                                                                                    | KDM4D        | IFNGR2    | NR1H3    | ATR       | CHN2     | SWAP70      |
|             | CC2D2A                                                                                   | SAMD9        | ZNF594    | MCMDC2   | APPL2     | EPAS1    | KRT80       |
|             | ATP2A2                                                                                   | DNTTIP1      | FANCC     | SPG11    | PAMR1     | NUDC     | SRD5A3      |
|             | IDH2                                                                                     | RBM47        | CHST6     | TEX9     | RMDN3     | TTC23    | DNAJB1      |
|             | WNK3                                                                                     | GPATCH2      | AREL1     | MLH3     | UBE3D     | MIR374B  | FAM160A1    |
|             | CAPS2                                                                                    | TBCB         | DPAGT1    | CYB5R4   | TOP1      | NSFL1C   | MYEF2       |
|             | TM9SF1                                                                                   | RRN3P1       | MKRN1     | ZNF713   | GRAMD3    | TMEM105  | SPATA13-AS1 |
|             | ZSCAN12                                                                                  | IQCG         | RAB11FIP1 | LRP10    | FAM86C2P  | ZNF792   | MIR421      |
|             | ZDHHC16                                                                                  | NPHP1        | NHSL1     | GLIPR2   | MGA       | RAET1G   | NBEA        |
|             | CCP110                                                                                   | CD38         | ATRIP     | IFFO2    | CHMP4A    | PCDHGB2  | ANKUB1      |
|             | PKD1L3                                                                                   | IFT43        | TRAF3IP1  | PPM1H    | PPIL6     | SYTL5    | BRWD3       |
|             | KANSL3                                                                                   | HSD17B1      | CSNK1A1   | B9D1     | ACTG1     | MAP1A    | UBA1        |
|             | CPNE1                                                                                    | EFNB3        | XKR9      | RHPN2    | LINC01171 | YPEL1    | EPHB6       |
|             | ADAMTSL2                                                                                 | MAP1LC3B2    | DRAP1     | PNKD     | CLIP1     | GJC2     | SPAG6       |
|             | ZMYND10                                                                                  | PRICKLE2-AS3 | ZBTB47    | STOM     | ZNF641    | WDR20    | SLC1A1      |
|             | S100PBP                                                                                  | RPGRIP1L     | ZDHHC23   | KPNA1    | TSEN15P2  | CTSS     | PVRL4       |
|             | CENPF                                                                                    | CHD1         | TNNI1     | SNHG1    | C3orf52   |          |             |
| miR-199b-3p | RGS18                                                                                    | FCGR3B       | HBA1      | MEFV     | SULT1B1   | TUBB1    | FPR1        |
|             | TNFRSF10C                                                                                | EMR3         | CR1L      | CSF3R    | CR1       | S100A8   | C19orf38    |
|             | MNDA                                                                                     | VNN2         | CXCR2     | NRGN     | SIRPB2    | HK3      | BCL2A1      |
|             | SLC11A1                                                                                  | SELL         | GLT1D1    | LRRC25   | LILRA1    | VEPH1    | FCN1        |
|             | TFF1                                                                                     | FGFBP2       | DGAT2     | HSPA6    | CGREF1    |          |             |
| miR-142-5p  | SOWAHA                                                                                   | MUC15        | SCGB2A1   | DKK1     | HCG14     | SLC9A2   | C15orf65    |
|             | HS6ST2                                                                                   | PCDH10       | NDST4     | NMBR     | WDR72     | AGPAT9   | GLRX2       |

**Supplementary table S3 continued**

| <b>miRNA</b>       | <b>Negatively correlated asthma-associated genes</b><br>(bold = validated target gene of miRNA) |           |           |           |           |            |           |
|--------------------|-------------------------------------------------------------------------------------------------|-----------|-----------|-----------|-----------|------------|-----------|
| <b>miR-142-5p</b>  | C6                                                                                              | SOWAHB    | SLC2A12   | C11orf53  | ANXA2P2   | LINC00643  | GSTA1     |
|                    | NUDT16P1                                                                                        | GBP6      | DIRAS3    | F2RL1     | PDCL3     | PLA2G5     | CLDN16    |
|                    | HIST3H2A                                                                                        | MLF1      | GEMIN8P4  | MRPL42    | COPG2     | GCLM       | TRMT10A   |
|                    | MAL2                                                                                            | C11orf74  | LINC01171 | SDR16C5   | ENPP5     | TMEM45B    | RGN       |
|                    | CDH2                                                                                            | LRRTM4    | KIF1A     | SERPINB5  | FAM104B   | SEPP1      | ZNF157    |
|                    | NME5                                                                                            | NDUFB3    | MYCBP     | DYNLT3    | BBS12     | C1D        | EDAR      |
|                    | MRAP2                                                                                           | DUSP19    | MB        | SLC27A2   | APOO      | KLHL13     | HSPA4L    |
|                    | CBR1                                                                                            | CCDC152   | MPC2      | ELOVL6    | IPMK      | TREM2      | ARL3      |
|                    | RPL26L1                                                                                         | RHOU      | SMKR1     | NQO1      | ACOT4     | FAM180A    | AP1M2     |
|                    | IL20RA                                                                                          | TRIM36    | ENPP4     | PPP4R4    | FAM174A   | HSDL2      | NAT1      |
|                    | SOSTDC1                                                                                         | PEX7      | OCLN      | CD24P4    | AKR1C2    | RPP40      | LRRIQ3    |
|                    | FBXO36                                                                                          | LINC01014 | SETD9     | ZMYND12   | C14orf142 | UBL3       | VSTM2L    |
|                    | ANKRD66                                                                                         | PLS1      | PCDH9     | CXXC4     | CDS1      | PTGR1      | ABHD17B   |
|                    | ABHD6                                                                                           | PPP1R14C  | STOX1     | C11orf88  | RPA3      | AGR3       | PRRG4     |
|                    | HES2                                                                                            | CXorf57   | SOX2-OT   | SNX7      | CETN2     | C8orf47    | LINC00908 |
|                    | EIF4HP1                                                                                         | TTC30B    | FAT3      | COPRS     | FOXA2     | SLMO2      | RHOD      |
|                    | KLHL32                                                                                          | GPR115    | PIH1D3    | C16orf80  | C9orf116  | HIBADH     | RPL7AP64  |
|                    | PCDHB1                                                                                          | AKR1B10   | TIPARP    | FGF14     | BLVRA     | DCDC2      | EPB41L4B  |
|                    | EHHADH                                                                                          | RBM24     | KLHDC9    | SNTB1     | TP53RK    | FAM96B     | HSD17B13  |
|                    | ZBED5-AS1                                                                                       | C10orf107 | PFN2      | PRDX1     | B3GNT5    | AGPAT5     | NAA20     |
|                    | PCDHA4                                                                                          | C5orf49   | TPH1      | CERS6     | FGFBP1    | DUSP14     | MBOAT2    |
|                    | MRPL36                                                                                          | PRDX5     | C2orf40   | C11orf70  | DNMBP-AS1 | NDUFAB1    | EID2      |
|                    | TRHDE                                                                                           | MORN2     | C12orf75  | SCCPDH    | PRMT6     | PNPLA4     | CDKL2     |
|                    | SNTN                                                                                            | BRI3BP    | TRMT1L    | ZNF396    | GREM2     | NSMCE1     | SAP30     |
|                    | MRPL44                                                                                          | TM4SF1    | RABL5     | LINC00589 | ARHGAP42  | SRI        | C8orf37   |
|                    | LZTFL1                                                                                          | LSAMP     | TXN       | TTC30A    | DYNLRB2   | ZMPSTE24   | KBTBD4    |
|                    | VAMP8                                                                                           | CRNDE     | HN1L      | NDUFA1    | TMEM38A   | CDKN2B     | CALCA     |
|                    | CA9                                                                                             | UFC1      | MALRD1    | MEIG1     | COX5A     | SNORD108   | DEFB1     |
|                    | CDK7                                                                                            | AK7       | SCAMP1    | FAM183A   | ZNF165    | EFHC2      | LIPH      |
|                    | UGDH                                                                                            | SUMO1     | AOX1      | DBI       | CATSPERD  | FCF1       | SYPL1     |
|                    | ARL13B                                                                                          | MORN5     | CHGA      | RMI1      | SCEL      | SRGAP3-AS2 | CDH13     |
|                    | EFCAB10                                                                                         | RBKS      | SQLE      | STMND1    | TOMM34    |            |           |
| <b>miR-181b-5p</b> | HBA1                                                                                            | TUBB1     | RGS18     | FCGR3B    | TNFRSF10C | SULT1B1    | MNDA      |
|                    | EMR3                                                                                            | SELL      | HK3       | CSF3R     | CXCR2     | FPR1       | FCN1      |
|                    | SLC11A1                                                                                         | LILRA1    | NRGN      | MEFV      | ITGA2B    | LRRC25     | VEPH1     |
|                    | LILRA6                                                                                          |           |           |           |           |            |           |
| <b>miR-195-5p</b>  | HBA1                                                                                            | RGS18     | FCGR3B    | SULT1B1   | TUBB1     | NRGN       | CR1L      |
|                    | TNFRSF10C                                                                                       | MEFV      | GLT1D1    | CXCR2     | C19orf38  | CXCR2P1    | CSF3R     |
|                    | S100A8                                                                                          | VNN2      | SLC11A1   | EMR3      | FPR1      | HK3        | MNDA      |
|                    | LILRA6                                                                                          | FGFBP2    | FAM27E3   | ITIH6     | LUCAT1    | FCN1       | ABCC6P1   |

**Supplementary table S3 continued**

| miRNA       | Negatively correlated asthma-associated genes<br>(bold = validated target gene of miRNA) |           |          |               |        |           |          |
|-------------|------------------------------------------------------------------------------------------|-----------|----------|---------------|--------|-----------|----------|
| miR-195-5p  | LILRA1                                                                                   | LRRC25    | NFE4     | SELL          | HOXB1  | CR1       | DGAT2    |
|             | VNN1                                                                                     | MINOS1P3  | FAM220CP | IL1B          | SPATS1 | LILRB2    | NCF1C    |
|             | NCF2                                                                                     | ITGA2B    | SIRPB2   | DUXAP1        | MGAM   | BCL2A1    | SERPINA1 |
|             | ANKRD18CP                                                                                | PLCH1-AS1 | TPT1P12  | VEPH1         | IBSP   |           |          |
| miR-125b-5p | HBA1                                                                                     | NRGN      | FCGR3B   | <b>S100A8</b> | GLT1D1 | TNFRSF10C | TUBB1    |
|             | MEFV                                                                                     | SILT1B1   | CR1      | C15ORF48      | LRRC25 | CR1L      | FCN1     |
|             | FGFBP2                                                                                   | CSF3R     | FPR1     | CXCR2         | EMR2   | RGS18     |          |

Genes are ranked (left to right) from most to least significant negatively correlated asthma-associated genes.

# Supplementary Table S4. Gene ontology and pathway analyses using Enrichr

**Table 4a: Biological processes of negatively correlated asthma genes per miRNA**

|                    | Pathway/term                                                                   | Overlap | Adjusted P-value |
|--------------------|--------------------------------------------------------------------------------|---------|------------------|
| <b>miR-199b-5p</b> | cilium assembly (GO:0060271)                                                   | 57/288  | 1.21E-17         |
|                    | cilium organization (GO:0044782)                                               | 46/192  | 1.23E-17         |
|                    | plasma membrane bounded cell projection assembly (GO:0120031)                  | 46/241  | 1.19E-13         |
|                    | organelle assembly (GO:0070925)                                                | 55/376  | 1.64E-11         |
|                    | intraciliary transport (GO:0042073)                                            | 17/46   | 4.19E-09         |
|                    | intraciliary transport involved in cilium assembly (GO:0035735)                | 15/40   | 4.69E-08         |
|                    | neutrophil degranulation (GO:0043312)                                          | 46/479  | 7.89E-04         |
|                    | neutrophil activation involved in immune response (GO:0002283)                 | 46/483  | 8.65E-04         |
|                    | neutrophil mediated immunity (GO:0002446)                                      | 46/487  | 8.93E-04         |
|                    | protein transport along microtubule (GO:0098840)                               | 7/16    | 8.93E-04         |
|                    | axoneme assembly (GO:0035082)                                                  | 8/24    | 1.78E-03         |
|                    | regulation of cilium movement (GO:0003352)                                     | 5/8     | 2.23E-03         |
|                    | axonemal dynein complex assembly (GO:0070286)                                  | 9/33    | 2.56E-03         |
|                    | protein complex localization (GO:0031503)                                      | 7/22    | 7.46E-03         |
|                    | ciliary basal body-plasma membrane docking (GO:0097711)                        | 14/96   | 2.16E-02         |
|                    | regulation of cilium assembly (GO:1902017)                                     | 7/27    | 2.78E-02         |
|                    | regulation of organelle assembly (GO:1902115)                                  | 9/47    | 3.88E-02         |
|                    | nucleoside diphosphate phosphorylation (GO:0006165)                            | 4/8     | 3.94E-02         |
| <b>miR-223-3p</b>  | cilium assembly (GO:0060271)                                                   | 88/288  | 3.88E-11         |
|                    | organelle assembly (GO:0070925)                                                | 100/376 | 4.60E-09         |
|                    | plasma membrane bounded cell projection assembly (GO:0120031)                  | 72/241  | 1.15E-08         |
|                    | intraciliary transport involved in cilium assembly (GO:0035735)                | 23/40   | 5.37E-08         |
|                    | intraciliary transport (GO:0042073)                                            | 24/46   | 2.55E-07         |
|                    | cilium organization (GO:0044782)                                               | 58/192  | 3.76E-07         |
|                    | regulation of cellular amine metabolic process (GO:0033238)                    | 24/51   | 2.27E-06         |
|                    | regulation of cellular amino acid metabolic process (GO:0006521)               | 24/51   | 2.27E-06         |
|                    | regulation of G2/M transition of mitotic cell cycle (GO:0010389)               | 47/149  | 2.27E-06         |
|                    | regulation of canonical Wnt signaling pathway (GO:0060828)                     | 60/213  | 2.27E-06         |
|                    | regulation of cellular ketone metabolic process (GO:0010565)                   | 26/61   | 5.34E-06         |
|                    | protein ubiquitination (GO:0016567)                                            | 111/506 | 1.05E-05         |
|                    | Wnt signaling pathway. planar cell polarity pathway (GO:0060071)               | 32/88   | 1.05E-05         |
|                    | negative regulation of canonical Wnt signaling pathway (GO:0090090)            | 45/148  | 1.08E-05         |
|                    | regulation of establishment of planar polarity (GO:0090175)                    | 32/89   | 1.25E-05         |
|                    | proteasome-mediated ubiquitin-dependent protein catabolic process (GO:0043161) | 72/291  | 1.64E-05         |
|                    | positive regulation of canonical Wnt signaling pathway (GO:0090263)            | 37/113  | 1.64E-05         |
|                    | ubiquitin-dependent protein catabolic process (GO:0006511)                     | 81/341  | 1.64E-05         |
|                    | protein polyubiquitination (GO:0000209)                                        | 70/283  | 2.27E-05         |

**Table S4a (continued)**

|                   | Pathway/term                                                                                                                  | Overlap | Adjusted P-value |
|-------------------|-------------------------------------------------------------------------------------------------------------------------------|---------|------------------|
| <b>miR-223-3p</b> | positive regulation of ubiquitin-protein ligase activity involved in regulation of mitotic cell cycle transition (GO:0051437) | 28/76   | 3.39E-05         |
|                   | regulation of ubiquitin-protein ligase activity involved in mitotic cell cycle (GO:0051439)                                   | 27/72   | 3.51E-05         |
|                   | positive regulation of ubiquitin protein ligase activity (GO:1904668)                                                         | 29/82   | 5.18E-05         |
|                   | regulation of transcription from RNA polymerase II promoter in response to hypoxia (GO:0061418)                               | 28/78   | 5.56E-05         |
|                   | regulation of mitotic cell cycle phase transition (GO:1901990)                                                                | 50/184  | 5.61E-05         |
|                   | proteasomal protein catabolic process (GO:0010498)                                                                            | 60/237  | 5.67E-05         |
|                   | anaphase-promoting complex-dependent catabolic process (GO:0031145)                                                           | 28/79   | 6.69E-05         |
|                   | NIK/NF-kappaB signaling (GO:0038061)                                                                                          | 28/80   | 8.69E-05         |
|                   | regulation of hematopoietic stem cell differentiation (GO:1902036)                                                            | 27/76   | 9.45E-05         |
|                   | negative regulation of ubiquitin protein ligase activity (GO:1904667)                                                         | 27/77   | 1.18E-04         |
|                   | regulation of hematopoietic progenitor cell differentiation (GO:1901532)                                                      | 27/77   | 1.18E-04         |
|                   | negative regulation of Wnt signaling pathway (GO:0030178)                                                                     | 47/174  | 1.18E-04         |
|                   | Golgi vesicle transport (GO:0048193)                                                                                          | 65/271  | 1.19E-04         |
|                   | negative regulation of cell cycle G2/M phase transition (GO:1902750)                                                          | 25/69   | 1.36E-04         |
|                   | positive regulation of protein ubiquitination involved in ubiquitin-dependent protein catabolic process (GO:2000060)          | 29/87   | 1.41E-04         |
|                   | regulation of stem cell differentiation (GO:2000736)                                                                          | 29/88   | 1.78E-04         |
|                   | regulation of transcription from RNA polymerase II promoter in response to stress (GO:0043618)                                | 30/93   | 1.91E-04         |
|                   | negative regulation of G2/M transition of mitotic cell cycle (GO:0010972)                                                     | 23/62   | 2.03E-04         |
|                   | retrograde vesicle-mediated transport. Golgi to ER (GO:0006890)                                                               | 27/80   | 2.23E-04         |
|                   | regulation of mRNA stability (GO:0043488)                                                                                     | 37/128  | 2.35E-04         |
|                   | positive regulation of telomerase RNA localization to Cajal body (GO:1904874)                                                 | 10/15   | 2.64E-04         |
|                   | cellular protein localization (GO:0034613)                                                                                    | 73/327  | 3.61E-04         |
|                   | non-canonical Wnt signaling pathway (GO:0035567)                                                                              | 36/127  | 4.89E-04         |
|                   | negative regulation of mitotic cell cycle phase transition (GO:1901991)                                                       | 26/79   | 5.14E-04         |
|                   | positive regulation of Wnt signaling pathway (GO:0030177)                                                                     | 38/140  | 7.94E-04         |
|                   | multivesicular body assembly (GO:0036258)                                                                                     | 14/30   | 8.03E-04         |
|                   | SCF-dependent proteasomal ubiquitin-dependent protein catabolic process (GO:0031146)                                          | 24/72   | 8.57E-04         |
|                   | protein modification by small protein removal (GO:0070646)                                                                    | 60/261  | 8.78E-04         |
|                   | protein deubiquitination (GO:0016579)                                                                                         | 59/257  | 1.06E-03         |
|                   | virion assembly (GO:0019068)                                                                                                  | 10/17   | 1.08E-03         |
|                   | neutrophil activation involved in immune response (GO:0002283)                                                                | 97/483  | 1.08E-03         |
|                   | multivesicular body organization (GO:0036257)                                                                                 | 14/31   | 1.14E-03         |
|                   | neutrophil degranulation (GO:0043312)                                                                                         | 96/479  | 1.26E-03         |
|                   | autophagosome organization (GO:1905037)                                                                                       | 20/56   | 1.29E-03         |
|                   | ether lipid metabolic process (GO:0046485)                                                                                    | 7/9     | 1.53E-03         |

**Table S4a (continued)**

|                   | Pathway/term                                                                                                              | Overlap | Adjusted P-value |
|-------------------|---------------------------------------------------------------------------------------------------------------------------|---------|------------------|
| <b>miR-223-3p</b> | antigen processing and presentation of exogenous peptide antigen via MHC class I. TAP-dependent (GO:0002479)              | 24/75   | 1.57E-03         |
|                   | interleukin-1-mediated signaling pathway (GO:0070498)                                                                     | 28/95   | 1.82E-03         |
|                   | macroautophagy (GO:0016236)                                                                                               | 31/110  | 1.82E-03         |
|                   | regulation of telomerase RNA localization to Cajal body (GO:1904872)                                                      | 10/18   | 1.83E-03         |
|                   | vesicle budding from membrane (GO:0006900)                                                                                | 8/12    | 1.95E-03         |
|                   | G2/M transition of mitotic cell cycle (GO:0000086)                                                                        | 34/126  | 1.95E-03         |
|                   | autophagosome assembly (GO:0000045)                                                                                       | 20/58   | 2.02E-03         |
|                   | ciliary basal body-plasma membrane docking (GO:0097711)                                                                   | 28/96   | 2.06E-03         |
|                   | neutrophil mediated immunity (GO:0002446)                                                                                 | 96/487  | 2.06E-03         |
|                   | cell cycle G2/M phase transition (GO:0044839)                                                                             | 34/127  | 2.19E-03         |
|                   | protein complex localization (GO:0031503)                                                                                 | 11/22   | 2.35E-03         |
|                   | cellular protein complex assembly (GO:0043623)                                                                            | 37/144  | 2.57E-03         |
|                   | protein transport (GO:0015031)                                                                                            | 69/326  | 2.57E-03         |
|                   | antigen processing and presentation of exogenous peptide antigen via MHC class I (GO:0042590)                             | 24/78   | 2.62E-03         |
|                   | regulation of mitotic spindle assembly (GO:1901673)                                                                       | 10/19   | 2.87E-03         |
|                   | 'de novo' posttranslational protein folding (GO:0051084)                                                                  | 13/30   | 2.90E-03         |
|                   | respiratory electron transport chain (GO:0022904)                                                                         | 27/94   | 3.33E-03         |
|                   | stimulatory C-type lectin receptor signaling pathway (GO:0002223)                                                         | 32/121  | 4.23E-03         |
|                   | viral life cycle (GO:0019058)                                                                                             | 29/107  | 5.57E-03         |
|                   | chaperone mediated protein folding requiring cofactor (GO:0051085)                                                        | 11/24   | 5.67E-03         |
|                   | endosomal transport (GO:0016197)                                                                                          | 51/229  | 5.90E-03         |
|                   | regulation of protein localization to Cajal body (GO:1904869)                                                             | 6/8     | 6.39E-03         |
|                   | positive regulation of protein localization to Cajal body (GO:1904871)                                                    | 6/8     | 6.39E-03         |
|                   | innate immune response activating cell surface receptor signaling pathway (GO:0002220)                                    | 32/124  | 6.47E-03         |
|                   | proteolysis involved in cellular protein catabolic process (GO:0051603)                                                   | 26/93   | 6.68E-03         |
|                   | regulation of spindle assembly (GO:0090169)                                                                               | 11/25   | 8.18E-03         |
|                   | intra-Golgi vesicle-mediated transport (GO:0006891)                                                                       | 13/33   | 8.18E-03         |
|                   | negative regulation of programmed cell death (GO:0043069)                                                                 | 80/408  | 8.40E-03         |
|                   | cellular response to hypoxia (GO:0071456)                                                                                 | 33/132  | 9.18E-03         |
|                   | positive regulation of protein localization to membrane (GO:1905477)                                                      | 26/95   | 9.18E-03         |
|                   | Rab protein signal transduction (GO:0032482)                                                                              | 21/70   | 9.25E-03         |
|                   | regulation of organelle assembly (GO:1902115)                                                                             | 16/47   | 1.03E-02         |
|                   | positive regulation of clathrin-dependent endocytosis (GO:2000370)                                                        | 5/6     | 1.03E-02         |
|                   | regulation of extracellular exosome assembly (GO:1903551)                                                                 | 5/6     | 1.03E-02         |
|                   | regulation of cell death (GO:0010941)                                                                                     | 26/96   | 1.04E-02         |
|                   | positive regulation of exocytosis (GO:0045921)                                                                            | 13/34   | 1.05E-02         |
|                   | regulation of primary metabolic process (GO:0080090)                                                                      | 34/139  | 1.06E-02         |
|                   | positive regulation of protein insertion into mitochondrial membrane involved in apoptotic signaling pathway (GO:1900740) | 12/30   | 1.08E-02         |

**Table S4a (continued)**

|                   | Pathway/term                                                                                                              | Overlap | Adjusted P-value |
|-------------------|---------------------------------------------------------------------------------------------------------------------------|---------|------------------|
| <b>miR-223-3p</b> | regulation of protein insertion into mitochondrial membrane involved in apoptotic signaling pathway (GO:1900739)          | 12/30   | 1.08E-02         |
|                   | response to unfolded protein (GO:0006986)                                                                                 | 15/43   | 1.11E-02         |
|                   | positive regulation of exosomal secretion (GO:1903543)                                                                    | 8/15    | 1.11E-02         |
|                   | mitochondrial respiratory chain complex assembly (GO:0033108)                                                             | 26/97   | 1.16E-02         |
|                   | intracellular protein transport (GO:0006886)                                                                              | 69/347  | 1.28E-02         |
|                   | regulation of mitotic spindle organization (GO:0060236)                                                                   | 13/35   | 1.34E-02         |
|                   | apical junction assembly (GO:0043297)                                                                                     | 13/35   | 1.34E-02         |
|                   | ubiquitin-dependent ERAD pathway (GO:0030433)                                                                             | 18/58   | 1.39E-02         |
|                   | post-Golgi vesicle-mediated transport (GO:0006892)                                                                        | 18/58   | 1.39E-02         |
|                   | viral budding (GO:0046755)                                                                                                | 10/23   | 1.46E-02         |
|                   | Ras protein signal transduction (GO:0007265)                                                                              | 48/223  | 1.56E-02         |
|                   | positive regulation of establishment of protein localization to mitochondrion (GO:1903749)                                | 28/110  | 1.61E-02         |
|                   | regulation of macroautophagy (GO:0016241)                                                                                 | 29/116  | 1.74E-02         |
|                   | protein transport along microtubule (GO:0098840)                                                                          | 8/16    | 1.74E-02         |
|                   | regulation of exosomal secretion (GO:1903541)                                                                             | 8/16    | 1.74E-02         |
|                   | negative regulation of apoptotic process (GO:0043066)                                                                     | 90/485  | 1.84E-02         |
|                   | mitochondrial ATP synthesis coupled electron transport (GO:0042775)                                                       | 23/85   | 1.95E-02         |
|                   | vesicle-mediated transport (GO:0016192)                                                                                   | 78/410  | 1.97E-02         |
|                   | fatty acid catabolic process (GO:0009062)                                                                                 | 19/65   | 2.03E-02         |
|                   | tumor necrosis factor-mediated signaling pathway (GO:0033209)                                                             | 30/123  | 2.07E-02         |
|                   | nucleotide-sugar metabolic process (GO:0009225)                                                                           | 7/13    | 2.16E-02         |
|                   | positive regulation of mitochondrial outer membrane permeabilization involved in apoptotic signaling pathway (GO:1901030) | 13/37   | 2.17E-02         |
|                   | negative regulation of cell death (GO:0060548)                                                                            | 22/81   | 2.29E-02         |
|                   | modification-dependent protein catabolic process (GO:0019941)                                                             | 33/141  | 2.37E-02         |
|                   | regulation of autophagosome assembly (GO:2000785)                                                                         | 12/33   | 2.37E-02         |
|                   | modulation by symbiont of host cellular process (GO:0044068)                                                              | 5/7     | 2.37E-02         |
|                   | cellular lipid biosynthetic process (GO:0097384)                                                                          | 5/7     | 2.37E-02         |
|                   | protein localization to plasma membrane (GO:0072659)                                                                      | 31/130  | 2.37E-02         |
|                   | ESCRT complex disassembly (GO:1904896)                                                                                    | 6/10    | 2.40E-02         |
|                   | ESCRT III complex disassembly (GO:1904903)                                                                                | 6/10    | 2.40E-02         |
|                   | postreplication repair (GO:0006301)                                                                                       | 15/47   | 2.51E-02         |
|                   | chaperone-mediated protein complex assembly (GO:0051131)                                                                  | 8/17    | 2.51E-02         |
|                   | regulation of cellular response to stress (GO:0080135)                                                                    | 26/104  | 2.84E-02         |
|                   | regulation of proteasomal ubiquitin-dependent protein catabolic process (GO:0032434)                                      | 23/88   | 2.86E-02         |
|                   | smoothened signaling pathway (GO:0007224)                                                                                 | 11/30   | 3.41E-02         |
|                   | mitotic cell cycle phase transition (GO:0044772)                                                                          | 46/221  | 3.49E-02         |
|                   | cell-cell junction assembly (GO:0007043)                                                                                  | 21/79   | 3.64E-02         |
|                   | protein localization to cell periphery (GO:1990778)                                                                       | 28/117  | 3.65E-02         |

Table S4a (continued)

|                    | Pathway/term                                                                                                                                                  | Overlap | Adjusted P-value |
|--------------------|---------------------------------------------------------------------------------------------------------------------------------------------------------------|---------|------------------|
| <b>miR-223-3p</b>  | metaphase plate congression (GO:0051310)                                                                                                                      | 14/44   | 3.65E-02         |
|                    | nuclear envelope reassembly (GO:0031468)                                                                                                                      | 8/18    | 3.76E-02         |
|                    | negative regulation of response to endoplasmic reticulum stress (GO:1903573)                                                                                  | 9/22    | 3.78E-02         |
|                    | positive regulation of ATPase activity (GO:0032781)                                                                                                           | 12/35   | 3.83E-02         |
|                    | protein stabilization (GO:0050821)                                                                                                                            | 34/152  | 4.00E-02         |
|                    | cell part morphogenesis (GO:0032990)                                                                                                                          | 6/11    | 4.14E-02         |
|                    | regulation of inclusion body assembly (GO:0090083)                                                                                                            | 6/11    | 4.14E-02         |
|                    | intrinsic apoptotic signaling pathway in response to oxidative stress (GO:0008631)                                                                            | 6/11    | 4.14E-02         |
|                    | protein polymerization (GO:0051258)                                                                                                                           | 14/45   | 4.40E-02         |
|                    | phagosome acidification (GO:0090383)                                                                                                                          | 10/27   | 4.78E-02         |
|                    | negative regulation of cAMP-dependent protein kinase activity (GO:2000480)                                                                                    | 5/8     | 4.78E-02         |
|                    | actin polymerization or depolymerization (GO:0008154)                                                                                                         | 12/36   | 4.78E-02         |
| <b>miR-199b-3p</b> | neutrophil degranulation (GO:0043312)                                                                                                                         | 11/479  | 1.66E-08         |
|                    | neutrophil activation involved in immune response (GO:0002283)                                                                                                | 11/483  | 1.66E-08         |
|                    | neutrophil mediated immunity (GO:0002446)                                                                                                                     | 11/487  | 1.66E-08         |
|                    | inflammatory response (GO:0006954)                                                                                                                            | 6/252   | 2.06E-04         |
|                    | positive regulation of endopeptidase activity (GO:0010950)                                                                                                    | 2/24    | 3.73E-02         |
| <b>miR-181b-5p</b> | neutrophil degranulation (GO:0043312)                                                                                                                         | 8/479   | 1.75E-06         |
|                    | neutrophil activation involved in immune response (GO:0002283)                                                                                                | 8/483   | 1.75E-06         |
|                    | neutrophil mediated immunity (GO:0002446)                                                                                                                     | 8/487   | 1.75E-06         |
|                    | inflammatory response (GO:0006954)                                                                                                                            | 5/252   | 3.20E-04         |
| <b>miR-195-5p</b>  | neutrophil degranulation (GO:0043312)                                                                                                                         | 14/479  | 4.39E-09         |
|                    | neutrophil activation involved in immune response (GO:0002283)                                                                                                | 14/483  | 4.39E-09         |
|                    | neutrophil mediated immunity (GO:0002446)                                                                                                                     | 14/487  | 4.39E-09         |
|                    | inflammatory response (GO:0006954)                                                                                                                            | 8/252   | 4.14E-05         |
|                    | cellular defense response (GO:0006968)                                                                                                                        | 4/56    | 1.45E-03         |
|                    | leukocyte aggregation (GO:0070486)                                                                                                                            | 2/7     | 1.15E-02         |
|                    | pantothenate metabolic process (GO:0015939)                                                                                                                   | 2/8     | 1.31E-02         |
|                    | positive regulation of adaptive immune response based on somatic recombination of immune receptors built from immunoglobulin superfamily domains (GO:0002824) | 2/10    | 1.83E-02         |
| <b>miR-125b-5p</b> | inflammatory response (GO:0006954)                                                                                                                            | 5/252   | 2.14E-04         |
|                    | neutrophil degranulation (GO:0043312)                                                                                                                         | 6/479   | 2.14E-04         |
|                    | neutrophil activation involved in immune response (GO:0002283)                                                                                                | 6/483   | 2.14E-04         |
|                    | neutrophil mediated immunity (GO:0002446)                                                                                                                     | 6/487   | 2.14E-04         |
|                    | positive regulation of endopeptidase activity (GO:0010950)                                                                                                    | 2/24    | 7.56E-03         |
|                    | pattern recognition receptor signaling pathway (GO:0002221)                                                                                                   | 2/48    | 2.46E-02         |
|                    | neutrophil chemotaxis (GO:0030593)                                                                                                                            | 2/53    | 2.46E-02         |



**Table S4a (continued)**

|                    | Pathway/term                        | Overlap | Adjusted<br>P-value |
|--------------------|-------------------------------------|---------|---------------------|
| <b>miR-125b-5p</b> | granulocyte chemotaxis (GO:0071621) | 2/56    | 2.46E-02            |
|                    | neutrophil migration (GO:1990266)   | 2/58    | 2.46E-02            |

**Table S4b: Reactome pathways of negatively correlated asthma genes per miRNA**

|                    | Pathway/term                                                                                    | Overlap | Adjusted P-value |
|--------------------|-------------------------------------------------------------------------------------------------|---------|------------------|
| <b>miR-199b-5p</b> | Assembly of the primary cilium Homo sapiens (R-HSA-5617833)                                     | 43/187  | 9.30E-16         |
|                    | Intraflagellar transport Homo sapiens (R-HSA-5620924)                                           | 18/41   | 2.70E-11         |
|                    | Organelle biogenesis and maintenance Homo sapiens (R-HSA-1852241)                               | 49/326  | 7.81E-11         |
|                    | Cargo trafficking to the periciliary membrane Homo sapiens (R-HSA-5620920)                      | 13/51   | 8.92E-05         |
|                    | BBSome-mediated cargo-targeting to cilium Homo sapiens (R-HSA-5620922)                          | 7/23    | 1.10E-02         |
|                    | Anchoring of the basal body to the plasma membrane Homo sapiens (R-HSA-5620912)                 | 14/97   | 2.30E-02         |
|                    | Endosomal Sorting Complex Required For Transport (ESCRT) Homo sapiens (R-HSA-917729)            | 7/28    | 3.10E-02         |
|                    | HSF1 activation Homo sapiens (R-HSA-3371511)                                                    | 7/29    | 3.43E-02         |
| <b>miR-223-3p</b>  | Assembly of the primary cilium Homo sapiens (R-HSA-5617833)                                     | 69/187  | 2.52E-13         |
|                    | Membrane Trafficking Homo sapiens (R-HSA-199991)                                                | 116/420 | 1.36E-12         |
|                    | Organelle biogenesis and maintenance Homo sapiens (R-HSA-1852241)                               | 95/326  | 9.38E-12         |
|                    | Vesicle-mediated transport Homo sapiens (R-HSA-5653656)                                         | 122/492 | 5.57E-10         |
|                    | Intraflagellar transport Homo sapiens (R-HSA-5620924)                                           | 24/41   | 3.04E-09         |
|                    | G2/M Transition Homo sapiens (R-HSA-69275)                                                      | 55/173  | 3.97E-08         |
|                    | Mitotic G2-G2/M phases Homo sapiens (R-HSA-453274)                                              | 55/175  | 5.53E-08         |
|                    | Hedgehog 'off' state Homo sapiens (R-HSA-5610787)                                               | 37/99   | 1.94E-07         |
|                    | Regulation of ornithine decarboxylase (ODC) Homo sapiens (R-HSA-350562)                         | 24/50   | 4.06E-07         |
|                    | Signaling by Hedgehog Homo sapiens (R-HSA-5358351)                                              | 44/136  | 8.46E-07         |
|                    | Cyclin E associated events during G1/S transition Homo sapiens (R-HSA-69202)                    | 28/68   | 1.12E-06         |
|                    | Regulation of activated PAK-2p34 by proteasome mediated degradation Homo sapiens (R-HSA-211733) | 23/49   | 1.12E-06         |
|                    | Vif-mediated degradation of APOBEC3G Homo sapiens (R-HSA-180585)                                | 24/53   | 1.21E-06         |
|                    | Apoptosis Homo sapiens (R-HSA-109581)                                                           | 49/163  | 1.21E-06         |
|                    | Dectin-1 mediated noncanonical NF-kB signaling Homo sapiens (R-HSA-5607761)                     | 26/61   | 1.21E-06         |
|                    | Cyclin A:Cdk2-associated events at S phase entry Homo sapiens (R-HSA-69656)                     | 28/69   | 1.21E-06         |
|                    | Regulation of Apoptosis Homo sapiens (R-HSA-169911)                                             | 23/50   | 1.21E-06         |
|                    | SCF-beta-TrCP mediated degradation of Emi1 Homo sapiens (R-HSA-174113)                          | 24/54   | 1.21E-06         |
|                    | AUF1 (hnRNP D0) binds and destabilizes mRNA Homo sapiens (R-HSA-450408)                         | 24/54   | 1.21E-06         |
|                    | Degradation of AXIN Homo sapiens (R-HSA-4641257)                                                | 24/54   | 1.21E-06         |
|                    | G2/M Checkpoints Homo sapiens (R-HSA-69481)                                                     | 46/150  | 1.21E-06         |
|                    | NIK. noncanonical NF-kB signaling Homo sapiens (R-HSA-5676590)                                  | 25/58   | 1.22E-06         |
|                    | PCP/CE pathway Homo sapiens (R-HSA-4086400)                                                     | 33/91   | 1.25E-06         |

**Table S4b (continued)**

|                   | Pathway/term                                                                                                                         | Overlap | Adjusted P-value |
|-------------------|--------------------------------------------------------------------------------------------------------------------------------------|---------|------------------|
| <b>miR-223-3p</b> | Vpu mediated degradation of CD4 Homo sapiens (R-HSA-180534)                                                                          | 23/51   | 1.36E-06         |
|                   | Programmed Cell Death Homo sapiens (R-HSA-5357801)                                                                                   | 49/166  | 1.36E-06         |
|                   | HIV Infection Homo sapiens (R-HSA-162906)                                                                                            | 60/222  | 1.36E-06         |
|                   | GLI3 is processed to GLI3R by the proteasome Homo sapiens (R-HSA-5610785)                                                            | 25/59   | 1.36E-06         |
|                   | Degradation of GLI2 by the proteasome Homo sapiens (R-HSA-5610783)                                                                   | 25/59   | 1.36E-06         |
|                   | The role of GTSE1 in G2/M progression after G2 checkpoint Homo sapiens (R-HSA-8852276)                                               | 25/59   | 1.36E-06         |
|                   | Cdc20:Phospho-APC/C mediated degradation of Cyclin A Homo sapiens (R-HSA-174184)                                                     | 28/71   | 1.36E-06         |
|                   | TP53 Regulates Metabolic Genes Homo sapiens (R-HSA-5628897)                                                                          | 31/84   | 1.54E-06         |
|                   | APC:Cdc20 mediated degradation of cell cycle proteins prior to satisfaction of the cell cycle checkpoint Homo sapiens (R-HSA-179419) | 28/72   | 1.83E-06         |
|                   | Intra-Golgi and retrograde Golgi-to-ER traffic Homo sapiens (R-HSA-6811442)                                                          | 51/179  | 2.00E-06         |
|                   | Degradation of beta-catenin by the destruction complex Homo sapiens (R-HSA-195253)                                                   | 30/82   | 2.91E-06         |
|                   | APC/C:Cdc20 mediated degradation of mitotic proteins Homo sapiens (R-HSA-176409)                                                     | 28/74   | 3.10E-06         |
|                   | Cell Cycle Checkpoints Homo sapiens (R-HSA-69620)                                                                                    | 51/182  | 3.10E-06         |
|                   | CDK-mediated phosphorylation and removal of Cdc6 Homo sapiens (R-HSA-69017)                                                          | 22/50   | 3.10E-06         |
|                   | Ubiquitin-dependent degradation of Cyclin D1 Homo sapiens (R-HSA-69229)                                                              | 22/50   | 3.10E-06         |
|                   | Ubiquitin-dependent degradation of Cyclin D Homo sapiens (R-HSA-75815)                                                               | 22/50   | 3.10E-06         |
|                   | Regulation of APC/C activators between G1/S and early anaphase Homo sapiens (R-HSA-176408)                                           | 29/79   | 3.74E-06         |
|                   | Activation of APC/C and APC/C:Cdc20 mediated degradation of mitotic proteins Homo sapiens (R-HSA-176814)                             | 28/75   | 3.97E-06         |
|                   | Autodegradation of the E3 ubiquitin ligase COP1 Homo sapiens (R-HSA-349425)                                                          | 22/51   | 4.35E-06         |
|                   | Asymmetric localization of PCP proteins Homo sapiens (R-HSA-4608870)                                                                 | 25/63   | 4.35E-06         |
|                   | Hh mutants that don't undergo autocatalytic processing are degraded by ERAD Homo sapiens (R-HSA-5362768)                             | 23/55   | 4.35E-06         |
|                   | SCF(Skp2)-mediated degradation of p27/p21 Homo sapiens (R-HSA-187577)                                                                | 24/59   | 4.35E-06         |
|                   | G1/S Transition Homo sapiens (R-HSA-69206)                                                                                           | 36/112  | 4.99E-06         |
|                   | Mitotic G1-G1/S phases Homo sapiens (R-HSA-453279)                                                                                   | 41/136  | 4.99E-06         |
|                   | Hedgehog 'on' state Homo sapiens (R-HSA-5632684)                                                                                     | 30/85   | 4.99E-06         |
|                   | APC/C-mediated degradation of cell cycle proteins Homo sapiens (R-HSA-174143)                                                        | 30/85   | 4.99E-06         |
|                   | Regulation of mitotic cell cycle Homo sapiens (R-HSA-453276)                                                                         | 30/85   | 4.99E-06         |
|                   | Antigen processing: Ubiquitination & Proteasome degradation Homo sapiens (R-HSA-983168)                                              | 65/260  | 4.99E-06         |

**Table S4b (continued)**

|                   | Pathway/term                                                                                                                         | Overlap | Adjusted P-value |
|-------------------|--------------------------------------------------------------------------------------------------------------------------------------|---------|------------------|
| <b>miR-223-3p</b> | p53-Independent DNA Damage Response Homo sapiens (R-HSA-69610)                                                                       | 22/52   | 5.22E-06         |
|                   | p53-Independent G1/S DNA damage checkpoint Homo sapiens (R-HSA-69613)                                                                | 22/52   | 5.22E-06         |
|                   | Ubiquitin Mediated Degradation of Phosphorylated Cdc25A Homo sapiens (R-HSA-69601)                                                   | 22/52   | 5.22E-06         |
|                   | Degradation of DVL Homo sapiens (R-HSA-4641258)                                                                                      | 23/56   | 5.24E-06         |
|                   | Regulation of mRNA stability by proteins that bind AU-rich elements Homo sapiens (R-HSA-450531)                                      | 30/86   | 5.98E-06         |
|                   | Cross-presentation of soluble exogenous antigens (endosomes) Homo sapiens (R-HSA-1236978)                                            | 21/49   | 7.17E-06         |
|                   | Hh mutants abrogate ligand secretion Homo sapiens (R-HSA-5387390)                                                                    | 23/57   | 7.29E-06         |
|                   | Host Interactions of HIV factors Homo sapiens (R-HSA-162909)                                                                         | 39/129  | 7.65E-06         |
|                   | Golgi-to-ER retrograde transport Homo sapiens (R-HSA-8856688)                                                                        | 35/110  | 7.65E-06         |
|                   | Transcriptional Regulation by TP53 Homo sapiens (R-HSA-3700989)                                                                      | 80/348  | 7.89E-06         |
|                   | Switching of origins to a post-replicative state Homo sapiens (R-HSA-69052)                                                          | 26/70   | 8.15E-06         |
|                   | Orc1 removal from chromatin Homo sapiens (R-HSA-68949)                                                                               | 26/70   | 8.15E-06         |
|                   | APC/C:Cdc20 mediated degradation of Securin Homo sapiens (R-HSA-174154)                                                              | 25/66   | 8.66E-06         |
|                   | Autodegradation of Cdh1 by Cdh1:APC/C Homo sapiens (R-HSA-174084)                                                                    | 24/62   | 9.06E-06         |
|                   | Cellular responses to stress Homo sapiens (R-HSA-2262752)                                                                            | 83/367  | 9.17E-06         |
|                   | Stabilization of p53 Homo sapiens (R-HSA-69541)                                                                                      | 22/54   | 9.32E-06         |
|                   | Regulation of RAS by GAPs Homo sapiens (R-HSA-5658442)                                                                               | 25/67   | 1.14E-05         |
|                   | Degradation of GLI1 by the proteasome Homo sapiens (R-HSA-5610780)                                                                   | 23/59   | 1.28E-05         |
|                   | Removal of licensing factors from origins Homo sapiens (R-HSA-69300)                                                                 | 26/72   | 1.39E-05         |
|                   | HSF1 activation Homo sapiens (R-HSA-3371511)                                                                                         | 15/29   | 1.49E-05         |
|                   | Hedgehog ligand biogenesis Homo sapiens (R-HSA-5358346)                                                                              | 24/64   | 1.62E-05         |
|                   | Class I MHC mediated antigen processing & presentation Homo sapiens (R-HSA-983169)                                                   | 71/305  | 1.81E-05         |
|                   | Signaling by Wnt Homo sapiens (R-HSA-195721)                                                                                         | 69/295  | 2.10E-05         |
|                   | E(R-Phagosome pathway Homo sapiens (R-HSA-1236974)                                                                                   | 24/65   | 2.16E-05         |
|                   | MAPK6/MAPK4 signaling Homo sapiens (R-HSA-5687128)                                                                                   | 30/92   | 2.29E-05         |
|                   | Activation of NF-kappaB in B cells Homo sapiens (R-HSA-1169091)                                                                      | 24/66   | 2.89E-05         |
|                   | TCF dependent signaling in response to WNT Homo sapiens (R-HSA-201681)                                                               | 51/199  | 3.00E-05         |
|                   | Regulation of DNA replication Homo sapiens (R-HSA-69304)                                                                             | 26/75   | 3.02E-05         |
|                   | Cell Cycle. Mitotic Homo sapiens (R-HSA-69278)                                                                                       | 97/462  | 3.09E-05         |
|                   | CDT1 association with the CDC6:ORC:origin complex Homo sapiens (R-HSA-68827)                                                         | 22/58   | 3.27E-05         |
|                   | APC/C:Cdh1 mediated degradation of Cdc20 and other APC/C:Cdh1 targeted proteins in late mitosis/early G1 Homo sapiens (R-HSA-174178) | 25/71   | 3.29E-05         |
|                   | Cell Cycle Homo sapiens (R-HSA-1640170)                                                                                              | 114/566 | 3.29E-05         |

**Table S4b (continued)**

|                   | Pathway/term                                                                                   | Overlap  | Adjusted P-value |
|-------------------|------------------------------------------------------------------------------------------------|----------|------------------|
| <b>miR-223-3p</b> | Metabolism Homo sapiens (R-HSA-1430728)                                                        | 319/1908 | 3.47E-05         |
|                   | Assembly of the pre-replicative complex Homo sapiens (R-HSA-68867)                             | 24/67    | 3.57E-05         |
|                   | p53-Dependent G1/S DNA damage checkpoint Homo sapiens (R-HSA-69580)                            | 23/63    | 3.88E-05         |
|                   | p53-Dependent G1 DNA Damage Response Homo sapiens (R-HSA-69563)                                | 23/63    | 3.88E-05         |
|                   | Infectious disease Homo sapiens (R-HSA-5663205)                                                | 77/348   | 4.26E-05         |
|                   | Antigen processing-Cross presentation Homo sapiens (R-HSA-1236975)                             | 27/82    | 5.30E-05         |
|                   | G1/S DNA Damage Checkpoints Homo sapiens (R-HSA-69615)                                         | 23/65    | 6.94E-05         |
|                   | Respiratory electron transport Homo sapiens (R-HSA-611105)                                     | 28/88    | 7.32E-05         |
|                   | Metabolism of polyamines Homo sapiens (R-HSA-351202)                                           | 27/84    | 8.58E-05         |
|                   | CLEC7A (Dectin-1) signaling Homo sapiens (R-HSA-5607764)                                       | 30/99    | 1.01E-04         |
|                   | Attenuation phase Homo sapiens (R-HSA-3371568)                                                 | 13/26    | 1.01E-04         |
|                   | COPI-dependent Golgi-to-ER retrograde traffic Homo sapiens (R-HSA-6811434)                     | 26/81    | 1.26E-04         |
|                   | The citric acid (TCA) cycle and respiratory electron transport Homo sapiens (R-HSA-1428517)    | 40/153   | 1.81E-04         |
|                   | Anchoring of the basal body to the plasma membrane Homo sapiens (R-HSA-5620912)                | 29/97    | 1.81E-04         |
|                   | Cargo trafficking to the periciliary membrane Homo sapiens (R-HSA-5620920)                     | 19/51    | 1.81E-04         |
|                   | COPI-mediated anterograde transport Homo sapiens (R-HSA-6807878)                               | 25/78    | 1.85E-04         |
|                   | Translocation of GLUT4 to the plasma membrane Homo sapiens (R-HSA-1445148)                     | 21/60    | 1.95E-04         |
|                   | Endosomal Sorting Complex Required For Transport (ESCRT) Homo sapiens (R-HSA-917729)           | 13/28    | 2.62E-04         |
|                   | Cooperation of Prefoldin and TriC/CCT in actin and tubulin folding Homo sapiens (R-HSA-389958) | 14/32    | 2.88E-04         |
|                   | M Phase Homo sapiens (R-HSA-68886)                                                             | 60/268   | 3.03E-04         |
|                   | TNFR2 non-canonical NF-kB pathway Homo sapiens (R-HSA-5668541)                                 | 28/95    | 3.20E-04         |
|                   | Formation of tubulin folding intermediates by CCT/TriC Homo sapiens (R-HSA-389960)             | 12/25    | 3.48E-04         |
|                   | Chk1/Chk2(Cds1) mediated inactivation of Cyclin B:Cdk1 complex Homo sapiens (R-HSA-75035)      | 8/12     | 3.54E-04         |
|                   | Activation of BAD and translocation to mitochondria Homo sapiens (R-HSA-111447)                | 9/15     | 3.61E-04         |
|                   | Cellular response to heat stress Homo sapiens (R-HSA-3371556)                                  | 28/96    | 3.81E-04         |
|                   | DNA Replication Pre-Initiation Homo sapiens (R-HSA-69002)                                      | 25/82    | 4.33E-04         |
|                   | M/G1 Transition Homo sapiens (R-HSA-68874)                                                     | 25/82    | 4.33E-04         |
|                   | Synthesis of DNA Homo sapiens (R-HSA-69239)                                                    | 28/97    | 4.56E-04         |
|                   | Gene Expression Homo sapiens (R-HSA-74160)                                                     | 269/1631 | 4.83E-04         |
|                   | Beta-catenin independent WNT signaling Homo sapiens (R-HSA-3858494)                            | 37/144   | 4.88E-04         |
|                   | HSF1-dependent transactivation Homo sapiens (R-HSA-3371571)                                    | 14/34    | 5.87E-04         |

**Table S4b (continued)**

|                   | Pathway/term                                                                                                                                    | Overlap | Adjusted P-value |
|-------------------|-------------------------------------------------------------------------------------------------------------------------------------------------|---------|------------------|
| <b>miR-223-3p</b> | Respiratory electron transport. ATP synthesis by chemiosmotic coupling. and heat production by uncoupling proteins. Homo sapiens (R-HSA-163200) | 30/109  | 6.34E-04         |
|                   | Mitotic Anaphase Homo sapiens (R-HSA-68882)                                                                                                     | 42/173  | 6.34E-04         |
|                   | Downstream TCR signaling Homo sapiens (R-HSA-202424)                                                                                            | 28/99   | 6.47E-04         |
|                   | BBSome-mediated cargo-targeting to cilium Homo sapiens (R-HSA-5620922)                                                                          | 11/23   | 7.03E-04         |
|                   | Mitotic Metaphase and Anaphase Homo sapiens (R-HSA-2555396)                                                                                     | 42/174  | 7.12E-04         |
|                   | ER to Golgi Anterograde Transport Homo sapiens (R-HSA-199977)                                                                                   | 34/131  | 7.45E-04         |
|                   | Regulation of HSF1-mediated heat shock response Homo sapiens (R-HSA-3371453)                                                                    | 24/80   | 7.47E-04         |
|                   | Prefoldin mediated transfer of substrate to CCT/TriC Homo sapiens (R-HSA-389957)                                                                | 12/27   | 7.75E-04         |
|                   | Generic Transcription Pathway Homo sapiens (R-HSA-212436)                                                                                       | 145/812 | 8.12E-04         |
|                   | RHO GTPase Effectors Homo sapiens (R-HSA-195258)                                                                                                | 56/255  | 8.12E-04         |
|                   | C-type lectin receptors (CLRs) Homo sapiens (R-HSA-5621481)                                                                                     | 32/123  | 1.10E-03         |
|                   | RHO GTPases Activate WASPs and WAVEs Homo sapiens (R-HSA-5663213)                                                                               | 14/36   | 1.12E-03         |
|                   | Axon guidance Homo sapiens (R-HSA-422475)                                                                                                       | 98/515  | 1.12E-03         |
|                   | TCR signaling Homo sapiens (R-HSA-202403)                                                                                                       | 31/118  | 1.13E-03         |
|                   | Separation of Sister Chromatids Homo sapiens (R-HSA-2467813)                                                                                    | 39/162  | 1.24E-03         |
|                   | S Phase Homo sapiens (R-HSA-69242)                                                                                                              | 32/124  | 1.24E-03         |
|                   | Golgi Associated Vesicle Biogenesis Homo sapiens (R-HSA-432722)                                                                                 | 18/54   | 1.24E-03         |
|                   | RHO GTPases activate IQGAPs Homo sapiens (R-HSA-5626467)                                                                                        | 7/11    | 1.45E-03         |
|                   | Budding and maturation of HIV virion Homo sapiens(R-HSA-162588)                                                                                 | 11/25   | 1.60E-03         |
|                   | Activation of BH3-only proteins Homo sapiens (R-HSA-114452)                                                                                     | 12/29   | 1.63E-03         |
|                   | DNA Replication Homo sapiens (R-HSA-69306)                                                                                                      | 28/105  | 1.71E-03         |
|                   | trans-Golgi Network Vesicle Budding Homo sapiens(R-HSA-199992)                                                                                  | 21/70   | 1.84E-03         |
|                   | Clathrin derived vesicle budding Homo sapiens (R-HSA-421837)                                                                                    | 21/70   | 1.84E-03         |
|                   | Asparagine N-linked glycosylation Homo sapiens (R-HSA-446203)                                                                                   | 55/259  | 2.12E-03         |
|                   | Regulation of PLK1 Activity at G2/M Transition Homo sapiens (R-HSA-2565942)                                                                     | 24/87   | 2.72E-03         |
|                   | Macroautophagy Homo sapiens (R-HSA-1632852)                                                                                                     | 20/67   | 2.74E-03         |
|                   | Downstream signaling events of B Cell Receptor (BCR) Homo sapiens (R-HSA-1168372)                                                               | 43/192  | 2.97E-03         |
|                   | G2/M DNA damage checkpoint Homo sapiens (R-HSA-69473)                                                                                           | 22/78   | 3.35E-03         |
|                   | Post-translational protein modification Homo sapiens(R-HSA-597592)                                                                              | 96/521  | 3.77E-03         |
|                   | Signaling by Insulin receptor Homo sapiens (R-HSA-74752)                                                                                        | 62/311  | 5.07E-03         |
|                   | Adaptive Immune System Homo sapiens (R-HSA-1280218)                                                                                             | 132/762 | 5.29E-03         |
|                   | Metabolism of lipids and lipoproteins Homo sapiens (R-HSA-556833)                                                                               | 116/659 | 6.09E-03         |

**Table S4b (continued)**

|                   | Pathway/term                                                                                                      | Overlap  | Adjusted P-value |
|-------------------|-------------------------------------------------------------------------------------------------------------------|----------|------------------|
| <b>miR-223-3p</b> | Folding of actin by CCT/TriC Homo sapiens (R-HSA-390450)                                                          | 6/10     | 6.28E-03         |
|                   | AURKA Activation by TPX2 Homo sapiens (R-HSA-8854518)                                                             | 20/72    | 7.16E-03         |
|                   | Phospholipid metabolism Homo sapiens (R-HSA-1483257)                                                              | 36/161   | 8.45E-03         |
|                   | FCERI mediated NF-kB activation Homo sapiens (R-HSA-2871837)                                                      | 27/111   | 9.40E-03         |
|                   | Mitochondrial translation Homo sapiens (R-HSA-5368287)                                                            | 23/90    | 1.04E-02         |
|                   | Loss of Nlp from mitotic centrosomes Homo sapiens(R-HSA-380259)                                                   | 19/69    | 1.04E-02         |
|                   | Loss of proteins required for interphase microtubule organization?from the centrosome Homo sapiens (R-HSA-380284) | 19/69    | 1.04E-02         |
|                   | Lysosome Vesicle Biogenesis Homo sapiens (R-HSA-432720)                                                           | 12/35    | 1.05E-02         |
|                   | Fanconi Anemia Pathway Homo sapiens (R-HSA-6783310)                                                               | 12/35    | 1.05E-02         |
|                   | DNA Repair Homo sapiens (R-HSA-73894)                                                                             | 56/285   | 1.18E-02         |
|                   | Glycerophospholipid biosynthesis Homo sapiens (R-HSA-1483206)                                                     | 25/102   | 1.20E-02         |
|                   | Processing of DNA double-strand break ends Homo sapiens (R-HSA-5693607)                                           | 21/81    | 1.32E-02         |
|                   | Peroxisomal lipid metabolism Homo sapiens (R-HSA-390918)                                                          | 10/27    | 1.33E-02         |
|                   | MHC class II antigen presentation Homo sapiens (R-HSA-2132295)                                                    | 25/103   | 1.37E-02         |
|                   | VEGFA-VEGFR2 Pathway Homo sapiens (R-HSA-4420097)                                                                 | 61/320   | 1.55E-02         |
|                   | Signalling to RAS Homo sapiens (R-HSA-167044)                                                                     | 49/246   | 1.64E-02         |
|                   | ISG15 antiviral mechanism Homo sapiens (R-HSA-1169408)                                                            | 19/72    | 1.67E-02         |
|                   | Antiviral mechanism by IFN-stimulated genes Homo sapiens (R-HSA-1169410)                                          | 19/72    | 1.67E-02         |
|                   | Transport to the Golgi and subsequent modification Homo sapiens (R-HSA-948021)                                    | 35/162   | 1.67E-02         |
|                   | Metabolism of proteins Homo sapiens (R-HSA-392499)                                                                | 174/1074 | 1.69E-02         |
|                   | MAPK family signaling cascades Homo sapiens (R-HSA-5683057)                                                       | 55/284   | 1.69E-02         |
|                   | Signaling by VEGF Homo sapiens (R-HSA-194138)                                                                     | 62/328   | 1.69E-02         |
|                   | MAPK1/MAPK3 signaling Homo sapiens (R-HSA-5684996)                                                                | 48/241   | 1.70E-02         |
|                   | GRB2 events in EGFR signaling Homo sapiens (R-HSA-179812)                                                         | 47/235   | 1.70E-02         |
|                   | SHC1 events in EGFR signaling Homo sapiens (R-HSA-180336)                                                         | 47/235   | 1.70E-02         |
|                   | SOS-mediated signalling Homo sapiens (R-HSA-112412)                                                               | 47/235   | 1.70E-02         |
|                   | SHC1 events in ERBB4 signaling Homo sapiens (R-HSA-1250347)                                                       | 47/235   | 1.70E-02         |
|                   | RAF/MAP kinase cascade Homo sapiens (R-HSA-5673001)                                                               | 47/235   | 1.70E-02         |
|                   | EPHB-mediated forward signaling Homo sapiens (R-HSA-3928662)                                                      | 13/42    | 1.70E-02         |
|                   | FRS-mediated FGFR2 signaling Homo sapiens (R-HSA-5654700)                                                         | 47/236   | 1.81E-02         |
|                   | FRS-mediated FGFR4 signaling Homo sapiens (R-HSA-5654712)                                                         | 47/236   | 1.81E-02         |
|                   | FRS-mediated FGFR3 signaling Homo sapiens (R-HSA-5654706)                                                         | 47/236   | 1.81E-02         |
|                   | FRS-mediated FGFR1 signaling Homo sapiens (R-HSA-5654693)                                                         | 47/236   | 1.81E-02         |
|                   | Mitochondrial translation elongation Homo sapiens (R-HSA-5389840)                                                 | 21/84    | 1.89E-02         |
|                   | EPH-Ephrin signaling Homo sapiens (R-HSA-2682334)                                                                 | 23/95    | 1.89E-02         |
|                   | Disease Homo sapiens (R-HSA-1643685)                                                                              | 122/725  | 1.91E-02         |
|                   | Formation of Incision Complex in GG-NER Homo sapiens (R-HSA-5696395)                                              | 13/43    | 2.04E-02         |

**Table S4b (continued)**

|                   | Pathway/term                                                                                   | Overlap | Adjusted P-value |
|-------------------|------------------------------------------------------------------------------------------------|---------|------------------|
| <b>miR-223-3p</b> | Iron uptake and transport Homo sapiens (R-HSA-917937)                                          | 13/43   | 2.04E-02         |
|                   | IGF1R signaling cascade Homo sapiens (R-HSA-2428924)                                           | 55/288  | 2.08E-02         |
|                   | Signaling by Type 1 Insulin-like Growth Factor 1 Receptor (IGF1R) Homo sapiens (R-HSA-2404192) | 55/288  | 2.08E-02         |
|                   | IRS-related events triggered by IGF1R Homo sapiens (R-HSA-2428928)                             | 55/288  | 2.08E-02         |
|                   | Interleukin receptor SHC signaling Homo sapiens (R-HSA-912526)                                 | 48/245  | 2.20E-02         |
|                   | ARMS-mediated activation Homo sapiens (R-HSA-170984)                                           | 47/239  | 2.21E-02         |
|                   | Signalling to p38 via RIT and RIN Homo sapiens (R-HSA-187706)                                  | 47/239  | 2.21E-02         |
|                   | Frs2-mediated activation Homo sapiens (R-HSA-170968)                                           | 47/240  | 2.39E-02         |
|                   | IRS-mediated signalling Homo sapiens (R-HSA-112399)                                            | 54/284  | 2.41E-02         |
|                   | Signaling by Rho GTPases Homo sapiens (R-HSA-194315)                                           | 67/367  | 2.41E-02         |
|                   | Retrograde transport at the Trans-Golgi-Network Homo sapiens (R-HSA-6811440)                   | 14/49   | 2.41E-02         |
|                   | Complex I biogenesis Homo sapiens (R-HSA-6799198)                                              | 14/49   | 2.41E-02         |
|                   | Signalling to ERKs Homo sapiens (R-HSA-187687)                                                 | 49/253  | 2.44E-02         |
|                   | Heme degradation Homo sapiens (R-HSA-189483)                                                   | 4/6     | 2.49E-02         |
|                   | VEGFR2 mediated cell proliferation Homo sapiens (R-HSA-5218921)                                | 48/248  | 2.67E-02         |
|                   | RHO GTPases activate PKNs Homo sapiens (R-HSA-5625740)                                         | 16/60   | 2.70E-02         |
|                   | Prolonged ERK activation events Homo sapiens (R-HSA-169893)                                    | 47/242  | 2.70E-02         |
|                   | Interleukin-3, 5 and GM-CSF signaling Homo sapiens (R-HSA-512988)                              | 50/261  | 2.74E-02         |
|                   | Insulin receptor signalling cascade Homo sapiens (R-HSA-74751)                                 | 54/287  | 2.86E-02         |
|                   | ABC-family proteins mediated transport Homo sapiens (R-HSA-382556)                             | 13/45   | 2.86E-02         |
|                   | Signaling by ERBB2 Homo sapiens (R-HSA-1227986)                                                | 13/45   | 2.86E-02         |
|                   | Signaling by Leptin Homo sapiens (R-HSA-2586552)                                               | 47/243  | 2.86E-02         |
|                   | Cell-cell junction organization Homo sapiens (R-HSA-421270)                                    | 16/61   | 3.11E-02         |
|                   | HIV Life Cycle Homo sapiens (R-HSA-162587)                                                     | 30/141  | 3.36E-02         |
|                   | Cyclin A/B1 associated events during G2/M transition Homo sapiens (R-HSA-69273)                | 8/22    | 3.38E-02         |
|                   | Post-chaperonin tubulin folding pathway Homo sapiens (R-HSA-389977)                            | 8/22    | 3.38E-02         |
|                   | Signaling by the B Cell Receptor (BCR) Homo sapiens (R-HSA-983705)                             | 45/233  | 3.42E-02         |
|                   | Interleukin-2 signaling Homo sapiens (R-HSA-451927)                                            | 48/252  | 3.44E-02         |
|                   | Signaling by EGFR Homo sapiens (R-HSA-177929)                                                  | 64/355  | 3.55E-02         |
|                   | Gap junction degradation Homo sapiens (R-HSA-190873)                                           | 5/10    | 3.55E-02         |
|                   | Activation of Ca-permeable Kainate Receptor Homo sapiens (R-HSA-451308)                        | 5/10    | 3.55E-02         |
|                   | Ionotropic activity of Kainate Receptors Homo sapiens (R-HSA-451306)                           | 5/10    | 3.55E-02         |
|                   | Mitochondrial translation initiation Homo sapiens (R-HSA-5368286)                              | 20/84   | 3.55E-02         |



**Table S4b (continued)**

|                    | Pathway/term                                                                                            | Overlap | Adjusted P-value |
|--------------------|---------------------------------------------------------------------------------------------------------|---------|------------------|
| <b>miR-223-3p</b>  | Mitochondrial translation termination Homo sapiens (R-HSA-5419276)                                      | 20/84   | 3.55E-02         |
|                    | NCAM signaling for neurite out-growth Homo sapiens (R-HSA-375165)                                       | 50/266  | 3.68E-02         |
|                    | AMER1 mutants destabilize the destruction complex Homo sapiens (R-HSA-4839748)                          | 6/14    | 3.68E-02         |
|                    | Truncations of AMER1 destabilize the destruction complex Homo sapiens (R-HSA-5467348)                   | 6/14    | 3.68E-02         |
|                    | truncated APC mutants destabilize the destruction complex Homo sapiens (R-HSA-4839744)                  | 6/14    | 3.68E-02         |
|                    | AXIN missense mutants destabilize the destruction complex Homo sapiens (R-HSA-5467340)                  | 6/14    | 3.68E-02         |
|                    | AXIN mutants destabilize the destruction complex. activating WNT signaling Homo sapiens (R-HSA-4839735) | 6/14    | 3.68E-02         |
|                    | APC truncation mutants have impaired AXIN binding Homo sapiens (R-HSA-5467337)                          | 6/14    | 3.68E-02         |
|                    | Synthesis of Prostaglandins (PG) and Thromboxanes (TX) Homo sapiens (R-HSA-2162123)                     | 6/14    | 3.68E-02         |
|                    | Centrosome maturation Homo sapiens (R-HSA-380287)                                                       | 19/79   | 3.69E-02         |
|                    | Recruitment of mitotic centrosome proteins and complexes Homo sapiens (R-HSA-380270)                    | 19/79   | 3.69E-02         |
|                    | Nonhomologous End-Joining (NHEJ) Homo sapiens (R-HSA-5693571)                                           | 14/52   | 3.70E-02         |
|                    | Diseases of signal transduction Homo sapiens (R-HSA-5663202)                                            | 53/288  | 4.32E-02         |
|                    | NrCAM interactions Homo sapiens (R-HSA-447038)                                                          | 4/7     | 4.47E-02         |
|                    | Citric acid cycle (TCA cycle) Homo sapiens (R-HSA-71403)                                                | 7/19    | 4.77E-02         |
|                    | G1 Phase Homo sapiens (R-HSA-69236)                                                                     | 11/38   | 4.77E-02         |
|                    | Cyclin D associated events in G1 Homo sapiens (R-HSA-69231)                                             | 11/38   | 4.77E-02         |
| <b>miR-181b-5p</b> | Immune System Homo sapiens (R-HSA-168256)                                                               | 8/1547  | 1.88E-02         |
|                    | Immunoregulatory interactions between a Lymphoid and a non-Lymphoid cell Homo sapiens (R-HSA-198933)    | 3/157   | 4.09E-02         |

**Supplementary Table S5. Gene ontology and pathway analyses using g:Profiler**

**Table 5a: Biological processes of negatively correlated asthma genes per miRNA**

|                    | Pathway/term                                                                     | Overlap  | Adjusted P-value |
|--------------------|----------------------------------------------------------------------------------|----------|------------------|
| <b>miR-199b-5p</b> | cilium organization (GO:0044782)                                                 | 74 / 414 | 6.09E-29         |
|                    | cilium assembly (GO:0060271)                                                     | 69 / 394 | 3.46E-26         |
|                    | cell projection assembly (GO:0030031)                                            | 74 / 611 | 4.84E-18         |
|                    | microtubule-based movement (GO:0007018)                                          | 55 / 383 | 8.59E-18         |
|                    | plasma membrane bounded cell projection assembly (GO:0120031)                    | 72 / 596 | 2.11E-17         |
|                    | intraciliary transport (GO:0042073)                                              | 22 / 53  | 3.48E-15         |
|                    | organelle assembly (GO:0070925)                                                  | 86 / 907 | 1.45E-14         |
|                    | protein transport along microtubule (GO:0098840)                                 | 23 / 68  | 1.27E-13         |
|                    | microtubule-based protein transport (GO:0099118)                                 | 23 / 68  | 1.27E-13         |
|                    | microtubule-based transport (GO:0099111)                                         | 35 / 201 | 5.47E-13         |
|                    | microtubule-based process (GO:0007017)                                           | 81 / 888 | 1.84E-12         |
|                    | cilium movement (GO:0003341)                                                     | 28 / 168 | 2.14E-09         |
|                    | neutrophil degranulation (GO:0043312)                                            | 18 / 484 | 2.42E-09         |
|                    | neutrophil activation involved in immune response (GO:0002283)                   | 18 / 487 | 2.69E-09         |
|                    | neutrophil mediated immunity (GO:0002446)                                        | 18 / 498 | 3.93E-09         |
|                    | neutrophil activation (GO:0042119)                                               | 18 / 500 | 4.20E-09         |
|                    | granulocyte activation (GO:0036230)                                              | 18 / 507 | 5.31E-09         |
|                    | intraciliary transport involved in cilium assembly (GO:0035735)                  | 16 / 40  | 8.26E-09         |
|                    | leukocyte degranulation (GO:0043299)                                             | 18 / 539 | 1.48E-08         |
|                    | myeloid cell activation involved in immune response (GO:0002275)                 | 18 / 549 | 2.02E-08         |
|                    | myeloid leukocyte mediated immunity (GO:0002444)                                 | 18 / 556 | 2.49E-08         |
|                    | axoneme assembly (GO:0035082)                                                    | 19 / 76  | 3.36E-08         |
|                    | myeloid leukocyte activation (GO:0002274)                                        | 18 / 673 | 5.79E-07         |
|                    | axonemal dynein complex assembly (GO:0070286)                                    | 13 / 37  | 6.96E-07         |
|                    | cilium-dependent cell motility (GO:0060285)                                      | 21 / 128 | 1.29E-06         |
|                    | cilium or flagellum-dependent cell motility (GO:0001539)                         | 21 / 128 | 1.29E-06         |
|                    | leukocyte activation involved in immune response (GO:0002366)                    | 18 / 719 | 1.69E-06         |
|                    | protein localization to cilium (GO:0061512)                                      | 16 / 64  | 1.69E-06         |
|                    | cell activation involved in immune response (GO:0002263)                         | 18 / 726 | 1.85E-06         |
|                    | transport along microtubule (GO:0010970)                                         | 24 / 166 | 1.88E-06         |
|                    | extracellular transport (GO:0006858)                                             | 13 / 38  | 4.71E-06         |
|                    | regulated exocytosis (GO:0045055)                                                | 18 / 799 | 9.12E-06         |
|                    | microtubule bundle formation (GO:0001578)                                        | 19 / 107 | 1.80E-05         |
|                    | epithelial cilium movement involved in extracellular fluid movement (GO:0003351) | 12 / 35  | 2.08E-05         |
|                    | leukocyte mediated immunity (GO:0002443)                                         | 18 / 891 | 5.05E-05         |
|                    | exocytosis (GO:0006887)                                                          | 18 / 921 | 8.43E-05         |
|                    | cytoskeleton-dependent intracellular transport (GO:0030705)                      | 19 / 204 | 1.08E-04         |
|                    | determination of left/right symmetry (GO:0007368)                                | 19 / 612 | 2.53E-04         |

**Table S5a (continued)**

|                    | Pathway/term                                                      | Overlap    | Adjusted P-value |
|--------------------|-------------------------------------------------------------------|------------|------------------|
| <b>miR-199b-5p</b> | cell projection organization (GO:0030030)                         | 96 / 1627  | 3.09E-04         |
|                    | cilium movement involved in cell motility (GO:0060294)            | 16 / 117   | 5.73E-04         |
|                    | determination of bilateral symmetry (GO:0009855)                  | 19 / 134   | 7.90E-04         |
|                    | specification of symmetry (GO:0009799)                            | 19 / 135   | 8.91E-04         |
|                    | immune effector process (GO:0002252)                              | 13 / 1310  | 1.27E-03         |
|                    | plasma membrane bounded cell projection organization (GO:0120036) | 92 / 1586  | 1.34E-03         |
|                    | immune response (GO:0006955)                                      | 21 / 2326  | 3.89E-03         |
|                    | protein localization to ciliary membrane (GO:1903441)             | 6 / 12     | 4.07E-03         |
|                    | flagellated sperm motility (GO:0030317)                           | 14 / 106   | 5.61E-03         |
|                    | sperm motility (GO:0097722)                                       | 14 / 106   | 5.61E-03         |
|                    | ciliary basal body-plasma membrane docking (GO:0097711)           | 14 / 95    | 8.62E-03         |
|                    | vesicle-mediated transport (GO:0016192)                           | 15 / 2193  | 1.28E-02         |
|                    | leukocyte activation (GO:0045321)                                 | 12 / 1346  | 1.37E-02         |
|                    | immune system process (GO:0002376)                                | 23 / 3322  | 1.76E-02         |
|                    | secretion by cell (GO:0032940)                                    | 12 / 1396  | 2.01E-02         |
|                    | microtubule cytoskeleton organization (GO:0000226)                | 48 / 617   | 2.37E-02         |
|                    | export from cell (GO:0140352)                                     | 12 / 1450  | 2.99E-02         |
|                    | organelle organization (GO:0006996)                               | 248 / 4115 | 3.01E-02         |
|                    | cell activation (GO:0001775)                                      | 12 / 1540  | 4.55E-02         |
|                    | autocrine signaling (GO:0035425)                                  | 3 / 8      | 4.90E-02         |
|                    | intraciliary retrograde transport (GO:0035721)                    | 12 / 1538  | 2.12E-02         |
|                    | cerebrospinal fluid circulation (GO:0090660)                      | 5 / 9      | 2.15E-02         |
|                    | smoothened signaling pathway (GO:0007224)                         | 17 / 149   | 2.17E-02         |
|                    | inner dynein arm assembly (GO:0036159)                            | 5 / 15     | 2.22E-02         |
|                    | neutrophil aggregation (GO:0070488)                               | 2/2        | 3.31E-02         |
|                    | defense response (GO:0006952)                                     | 14 / 1831  | 3.51E-02         |
|                    | cellular component assembly (GO:0022607)                          | 188 / 3030 | 4.76E-02         |
| <b>miR-223-3p</b>  | microtubule-based protein transport (GO:0099118)                  | 36/68      | 1.68E-10         |
|                    | protein transport along microtubule (GO:0098840)                  | 36/68      | 1.68E-10         |
|                    | intraciliary transport (GO:0042073)                               | 31/53      | 2.51E-10         |
|                    | cytoskeleton-dependent intracellular transport (GO:0030705)       | 68/207     | 4.93E-09         |
|                    | protein localization (GO:0008104)                                 | 508/2789   | 8.16E-09         |
|                    | intraciliary transport involved in cilium assembly (GO:0035735)   | 25/40      | 9.80E-09         |
|                    | organelle assembly (GO:0070925)                                   | 201/904    | 1.19E-08         |
|                    | macromolecule localization (GO:0033036)                           | 576/3238   | 1.22E-08         |
|                    | microtubule-based transport (GO:0099111)                          | 66/201     | 2.35E-08         |
|                    | transport along microtubule (GO:0010970)                          | 58/166     | 2.78E-08         |
|                    | oxidation-reduction process (GO:0055114)                          | 51/744     | 3.66E-08         |
|                    | cilium organization (GO:0044782)                                  | 109/414    | 6.57E-08         |
|                    | protein transport (GO:0015031)                                    | 278/1946   | 2.16E-07         |

**Table S5a (continued)**

|                   | Pathway/term                                                                   | Overlap  | Adjusted P-value |
|-------------------|--------------------------------------------------------------------------------|----------|------------------|
| <b>miR-223-3p</b> | cilium assembly (GO:0060271)                                                   | 103/394  | 3.93E-07         |
|                   | cell projection assembly (GO:0030031)                                          | 143/611  | 5.08E-07         |
|                   | peptide transport (GO:0015833)                                                 | 281/1989 | 5.68E-07         |
|                   | amide transport (GO:0042886)                                                   | 285/2024 | 5.80E-07         |
|                   | intracellular transport (GO:0046907)                                           | 301/1777 | 6.13E-07         |
|                   | plasma membrane bounded cell projection assembly (GO:0120031)                  | 140/596  | 6.20E-07         |
|                   | establishment of protein localization (GO:0045184)                             | 275/2044 | 9.31E-07         |
|                   | cellular protein localization (GO:0034613)                                     | 376/2024 | 1.12E-06         |
|                   | nitrogen compound transport (GO:0071705)                                       | 350/2347 | 2.14E-06         |
|                   | cellular macromolecule localization (GO:0070727)                               | 379/2035 | 2.27E-06         |
|                   | glutathione metabolic process (GO:0006749)                                     | 13/52    | 2.78E-06         |
|                   | cellular localization (GO:0051641)                                             | 430/3562 | 8.05E-06         |
|                   | cellular component biogenesis (GO:0044085)                                     | 545/3276 | 8.59E-06         |
|                   | organic substance transport (GO:0071702)                                       | 403/2790 | 9.96E-06         |
|                   | cellular protein catabolic process (GO:0044257)                                | 129/818  | 1.01E-05         |
|                   | organelle organization (GO:0006996)                                            | 612/4115 | 1.31E-05         |
|                   | vesicle organization (GO:0016050)                                              | 68/343   | 1.39E-05         |
|                   | proteolysis involved in cellular protein catabolic process (GO:0051603)        | 144/756  | 1.40E-05         |
|                   | cellular component assembly (GO:0022607)                                       | 521/3030 | 2.18E-05         |
|                   | regulation of cellular amino acid metabolic process (GO:0006521)               | 27/64    | 2.35E-05         |
|                   | anion transport (GO:0006820)                                                   | 415/2914 | 3.32E-05         |
|                   | small molecule metabolic process (GO:0044281)                                  | 146/1929 | 3.59E-05         |
|                   | microtubule-based movement (GO:0007018)                                        | 95/383   | 3.67E-05         |
|                   | organic acid metabolic process (GO:0006082)                                    | 95/1094  | 3.94E-05         |
|                   | energy derivation by oxidation of organic compounds (GO:0015980)               | 50/291   | 8.92E-05         |
|                   | intracellular protein transport (GO:0006886)                                   | 210/1195 | 1.55E-04         |
|                   | Golgi vesicle transport (GO:0048193)                                           | 79/383   | 1.66E-04         |
|                   | proteasome-mediated ubiquitin-dependent protein catabolic process (GO:0043161) | 73/435   | 1.90E-04         |
|                   | macroautophagy (GO:0016236)                                                    | 65/312   | 2.03E-04         |
|                   | microtubule-based process (GO:0007017)                                         | 180/888  | 2.45E-04         |
|                   | carboxylic acid metabolic process (GO:0019752)                                 | 88/1027  | 2.45E-04         |
|                   | Wnt signaling pathway. planar cell polarity pathway (GO:0060071)               | 35/110   | 2.47E-04         |
|                   | oxoacid metabolic process (GO:0043436)                                         | 90/1060  | 3.04E-04         |
|                   | establishment of tissue polarity (GO:0007164)                                  | 39/129   | 3.13E-04         |
|                   | establishment of planar polarity (GO:0001736)                                  | 39/129   | 3.13E-04         |
|                   | regulation of animal organ morphogenesis (GO:2000027)                          | 44/189   | 4.15E-04         |
|                   | cellular respiration (GO:0045333)                                              | 37/194   | 4.82E-04         |
|                   | protein catabolic process (GO:0030163)                                         | 142/983  | 4.84E-04         |
|                   | cell projection organization (GO:0030030)                                      | 298/1627 | 5.07E-04         |

**Table S5a (continued)**

|                   | Pathway/term                                                                                    | Overlap  | Adjusted P-value |
|-------------------|-------------------------------------------------------------------------------------------------|----------|------------------|
| <b>miR-223-3p</b> | tube development (GO:0035295)                                                                   | 20/1128  | 5.12E-04         |
|                   | cell adhesion (GO:0007155)                                                                      | 25/1494  | 5.13E-04         |
|                   | anaphase-promoting complex-dependent catabolic process (GO:0031145)                             | 29/84    | 5.15E-04         |
|                   | electron transport chain (GO:0022900)                                                           | 20/187   | 5.63E-04         |
|                   | biological adhesion (GO:0022610)                                                                | 25/1501  | 5.63E-04         |
|                   | mitochondrion organization (GO:0007005)                                                         | 79/570   | 6.12E-04         |
|                   | tissue development (GO:0009888)                                                                 | 24/2161  | 6.29E-04         |
|                   | modification-dependent protein catabolic process (GO:0019941)                                   | 104/664  | 6.35E-04         |
|                   | regulation of establishment of planar polarity (GO:0090175)                                     | 35/114   | 6.78E-04         |
|                   | organelle localization (GO:0051640)                                                             | 143/676  | 6.83E-04         |
|                   | ubiquitin-dependent protein catabolic process (GO:0006511)                                      | 103/657  | 7.01E-04         |
|                   | establishment of localization in cell (GO:0051649)                                              | 363/2840 | 8.24E-04         |
|                   | G2/M transition of mitotic cell cycle (GO:0000086)                                              | 54/261   | 9.35E-04         |
|                   | proteasomal protein catabolic process (GO:0010498)                                              | 98/495   | 9.41E-04         |
|                   | cellular aldehyde metabolic process (GO:0006081)                                                | 14/64    | 1.35E-03         |
|                   | plasma membrane bounded cell projection organization (GO:0120036)                               | 289/1586 | 1.35E-03         |
|                   | modification-dependent macromolecule catabolic process (GO:0043632)                             | 121/675  | 1.36E-03         |
|                   | regulation of transcription from RNA polymerase II promoter in response to hypoxia (GO:0061418) | 27/78    | 1.38E-03         |
|                   | anatomical structure morphogenesis (GO:0009653)                                                 | 35/2865  | 1.45E-03         |
|                   | regulation of cellular amine metabolic process (GO:0033238)                                     | 29/85    | 1.71E-03         |
|                   | cellular catabolic process (GO:0044248)                                                         | 312/2350 | 1.82E-03         |
|                   | generation of precursor metabolites and energy (GO:0006091)                                     | 53/548   | 1.92E-03         |
|                   | hormone metabolic process (GO:0042445)                                                          | 23/231   | 1.93E-03         |
|                   | cellular ketone metabolic process (GO:0042180)                                                  | 34/273   | 2.00E-03         |
|                   | vesicle-mediated transport (GO:0016192)                                                         | 307/2193 | 2.02E-03         |
|                   | morphogenesis of a polarized epithelium (GO:0001738)                                            | 45/151   | 2.38E-03         |
|                   | respiratory electron transport chain (GO:0022904)                                               | 26/118   | 2.54E-03         |
|                   | antigen processing and presentation (GO:0019882)                                                | 49/234   | 2.69E-03         |
|                   | primary alcohol metabolic process (GO:0034308)                                                  | 12/95    | 2.89E-03         |
|                   | animal organ morphogenesis (GO:0009887)                                                         | 15/1106  | 2.92E-03         |
|                   | antigen processing and presentation of exogenous peptide antigen (GO:0002478)                   | 45/174   | 2.93E-03         |
|                   | regulation of organelle organization (GO:0033043)                                               | 207/1224 | 2.99E-03         |
|                   | response to toxic substance (GO:0009636)                                                        | 20/249   | 3.12E-03         |
|                   | tertiary alcohol metabolic process (GO:1902644)                                                 | 6/20     | 3.33E-03         |
|                   | autophagosome assembly (GO:0000045)                                                             | 33/98    | 3.87E-03         |
|                   | cell cycle G2/M phase transition (GO:0044839)                                                   | 55/280   | 4.26E-03         |
|                   | tube morphogenesis (GO:0035239)                                                                 | 17/975   | 4.37E-03         |

**Table S5a (continued)**

|                   | Pathway/term                                                                             | Overlap | Adjusted P-value |
|-------------------|------------------------------------------------------------------------------------------|---------|------------------|
| <b>miR-223-3p</b> | antigen processing and presentation of exogenous antigen (GO:0019884)                    | 46/182  | 4.45E-03         |
|                   | morphogenesis of an epithelial bud (GO:0060572)                                          | 42461   | 4.93E-03         |
|                   | bone development (GO:0060348)                                                            | 11/212  | 5.04E-03         |
|                   | mitochondrial ATP synthesis coupled electron transport (GO:0042775)                      | 20/99   | 5.56E-03         |
|                   | regulation of canonical Wnt signaling pathway (GO:0060828)                               | 10/302  | 5.79E-03         |
|                   | membrane organization (GO:0061024)                                                       | 149/968 | 6.41E-03         |
|                   | multivesicular body assembly (GO:0036258)                                                | 11/30   | 6.56E-03         |
|                   | ATP synthesis coupled electron transport (GO:0042773)                                    | 20/100  | 6.58E-03         |
|                   | negative regulation of extrinsic apoptotic signaling pathway (GO:2001237)                | 14/109  | 6.89E-03         |
|                   | cellular detoxification (GO:1990748)                                                     | 13/113  | 6.92E-03         |
|                   | morphogenesis of an epithelial fold (GO:0060571)                                         | 6/26    | 7.78E-03         |
|                   | antigen processing and presentation of peptide antigen (GO:0048002)                      | 47/192  | 9.05E-03         |
|                   | vasculature development (GO:0001944)                                                     | 17/847  | 9.16E-03         |
|                   | multivesicular body organization (GO:0036257)                                            | 11/31   | 9.61E-03         |
|                   | protein polyubiquitination (GO:0000209)                                                  | 63/344  | 9.81E-03         |
|                   | regulation of organelle assembly (GO:1902115)                                            | 52/194  | 1.03E-02         |
|                   | retrograde vesicle-mediated transport. Golgi to endoplasmic reticulum (GO:0006890)       | 26/87   | 1.05E-02         |
|                   | autophagosome organization (GO:1905037)                                                  | 33/102  | 1.09E-02         |
|                   | regulation of hematopoietic stem cell differentiation (GO:1902036)                       | 25/76   | 1.19E-02         |
|                   | establishment of protein localization to mitochondrial membrane (GO:0090151)             | 18/53   | 1.27E-02         |
|                   | positive regulation of telomerase RNA localization to Cajal body (GO:1904874)            | 10/15   | 1.32E-02         |
|                   | cellular response to toxic substance (GO:0097237)                                        | 13/120  | 1.38E-02         |
|                   | digestive tract morphogenesis (GO:0048546)                                               | 18050   | 1.49E-02         |
|                   | heterophilic cell-cell adhesion via plasma membrane cell adhesion molecules (GO:0007157) | 18172   | 1.61E-02         |
|                   | ossification (GO:0001503)                                                                | 26/428  | 1.65E-02         |
|                   | neutrophil mediated immunity (GO:0002446)                                                | 84/498  | 1.69E-02         |
|                   | negative regulation of synapse assembly (GO:0051964)                                     | 3/8     | 1.79E-02         |
|                   | cellular hormone metabolic process (GO:0034754)                                          | 7/137   | 1.85E-02         |
|                   | mitochondrial respiratory chain complex assembly (GO:0033108)                            | 19/105  | 1.87E-02         |
|                   | regulation of developmental process (GO:0050793)                                         | 32/2648 | 1.89E-02         |
|                   | epithelium development (GO:0060429)                                                      | 17/1361 | 2.00E-02         |
|                   | canonical Wnt signaling pathway (GO:0060070)                                             | 10/347  | 2.03E-02         |
|                   | establishment of vesicle localization (GO:0051650)                                       | 54/215  | 2.08E-02         |
|                   | venous blood vessel morphogenesis (GO:0048845)                                           | 2/9     | 2.15E-02         |
|                   | regulation of postsynapse organization (GO:0099175)                                      | 7/92    | 2.28E-02         |
|                   | regulation of cellular ketone metabolic process (GO:0010565)                             | 50/195  | 2.41E-02         |
|                   | anatomical structure development (GO:0048856)                                            | 53/6210 | 2.45E-02         |

**Table S5a (continued)**

|                    | Pathway/term                                                                                                 | Overlap   | Adjusted P-value |
|--------------------|--------------------------------------------------------------------------------------------------------------|-----------|------------------|
| <b>miR-223-3p</b>  | protein localization to organelle (GO:0033365)                                                               | 170/1014  | 2.48E-02         |
|                    | transport (GO:0006810)                                                                                       | 614/5259  | 2.53E-02         |
|                    | negative regulation of canonical Wnt signaling pathway (GO:0090090)                                          | 29/188    | 2.59E-02         |
|                    | regulation of G2/M transition of mitotic cell cycle (GO:0010389)                                             | 48/202    | 2.63E-02         |
|                    | positive regulation of canonical Wnt signaling pathway (GO:0090263)                                          | 22/154    | 2.86E-02         |
|                    | positive regulation of organelle organization (GO:0010638)                                                   | 102/620   | 3.12E-02         |
|                    | response to acid chemical (GO:0001101)                                                                       | 14/142    | 3.21E-02         |
|                    | catabolic process (GO:0009056)                                                                               | 348/2746  | 3.27E-02         |
|                    | organ induction (GO:0001759)                                                                                 | 4/25      | 3.33E-02         |
|                    | antigen processing and presentation of exogenous peptide antigen via MHC class I. TAP-dependent (GO:0002479) | 24/75     | 3.35E-02         |
|                    | antigen processing and presentation of exogenous peptide antigen via MHC class I (GO:0042590)                | 25/80     | 3.42E-02         |
|                    | mitochondrial translation (GO:0032543)                                                                       | 26/136    | 3.45E-02         |
|                    | odontogenesis (GO:0042476)                                                                                   | 7/136     | 3.73E-02         |
|                    | bud elongation involved in lung branching (GO:0060449)                                                       | 5/7       | 4.06E-02         |
|                    | ion transport (GO:0006811)                                                                                   | 418/3689  | 4.25E-02         |
|                    | detoxification (GO:0098754)                                                                                  | 17/134    | 4.28E-02         |
|                    | regulation of multicellular organismal process (GO:0051239)                                                  | 33/2894   | 4.43E-02         |
|                    | neutrophil activation involved in immune response (GO:0002283)                                               | 81/487    | 4.48E-02         |
|                    | non-canonical Wnt signaling pathway (GO:0035567)                                                             | 38/151    | 4.81E-02         |
|                    | regulation of Wnt signaling pathway (GO:0030111)                                                             | 10/383    | 4.89E-02         |
|                    | cellular macromolecule catabolic process (GO:0044265)                                                        | 174/1237  | 4.94E-02         |
| <b>miR-199b-3p</b> | neutrophil degranulation (GO:0043312)                                                                        | 11 / 484  | 2.45E-07         |
|                    | neutrophil activation involved in immune response (GO:0002283)                                               | 11 / 487  | 2.62E-07         |
|                    | neutrophil mediated immunity (GO:0002446)                                                                    | 11 / 498  | 3.32E-07         |
|                    | neutrophil activation (GO:0042119)                                                                           | 11 / 500  | 3.46E-07         |
|                    | granulocyte activation (GO:0036230)                                                                          | 11 / 504  | 4.01E-07         |
|                    | leukocyte degranulation (GO:0043299)                                                                         | 11 / 539  | 7.65E-07         |
|                    | myeloid cell activation involved in immune response (GO:0002275)                                             | 11 / 549  | 9.29E-07         |
|                    | myeloid leukocyte mediated immunity (GO:0002444)                                                             | 11 / 556  | 1.06E-06         |
|                    | myeloid leukocyte activation (GO:0002274)                                                                    | 11 / 673  | 7.81E-06         |
|                    | leukocyte activation involved in immune response (GO:0002366)                                                | 11 / 719  | 1.55E-05         |
|                    | cell activation involved in immune response (GO:0002263)                                                     | 11 / 723  | 1.64E-05         |
|                    | regulated exocytosis (GO:0045055)                                                                            | 11 / 799  | 4.58E-05         |
|                    | leukocyte mediated immunity (GO:0002443)                                                                     | 11 / 891  | 1.39E-04         |
|                    | exocytosis (GO:0006887)                                                                                      | 11 / 921  | 1.94E-04         |
|                    | immune effector process (GO:0002252)                                                                         | 12 / 1310 | 7.99E-04         |
|                    | leukocyte activation (GO:0045321)                                                                            | 11/1346   | 8.17E-03         |
|                    | regulation of immune system process (GO:0002682)                                                             | 9/998     | 9.07E-03         |
|                    | immune system process (GO:0002376)                                                                           | 13/2326   | 9.17E-03         |

Table S5a (continued)

|                    | Pathway/term                                                     | Overlap  | Adjusted P-value |
|--------------------|------------------------------------------------------------------|----------|------------------|
| <b>miR-199b-3p</b> | secretion by cell (GO:0032940)                                   | 11/1396  | 1.16E-02         |
|                    | export from cell (GO:0140352)                                    | 11/1450  | 1.66E-02         |
|                    | complement receptor mediated signaling pathway (GO:0002430)      | 2/12     | 2.31E-02         |
|                    | cell activation (GO:0001775)                                     | 11/1510  | 2.43E-02         |
|                    | secretion (GO:0046903)                                           | 11/1538  | 2.89E-02         |
| <b>miR-142-5p</b>  | protein transport along microtubule (GO:0098840)                 | 7/68     | 1.65E-02         |
|                    | microtubule-based protein transport (GO:0099118)                 | 7/68     | 1.65E-02         |
|                    | oxidation-reduction process (GO:0055114)                         | 24/744   | 3.97E-02         |
|                    | intraciliary transport (GO:0042073)                              | 6/53     | 4.62E-02         |
| <b>miR-181b-5p</b> | neutrophil degranulation (GO:0043312)                            | 8 / 484  | 4.85E-07         |
|                    | neutrophil activation involved in immune response (GO:0002283)   | 8 / 487  | 5.09E-07         |
|                    | neutrophil mediated immunity (GO:0002446)                        | 8 / 498  | 6.08E-07         |
|                    | neutrophil activation (GO:0042119)                               | 8 / 500  | 6.27E-07         |
|                    | granulocyte activation (GO:0036230)                              | 8 / 507  | 7.00E-07         |
|                    | leukocyte degranulation (GO:0043299)                             | 8 / 539  | 1.14E-06         |
|                    | myeloid cell activation involved in immune response (GO:0002275) | 8 / 549  | 1.31E-06         |
|                    | myeloid leukocyte mediated immunity (GO:0002444)                 | 8 / 556  | 1.45E-06         |
|                    | myeloid leukocyte activation (GO:0002274)                        | 8 / 673  | 6.51E-06         |
|                    | leukocyte activation involved in immune response (GO:0002366)    | 8 / 719  | 1.09E-05         |
|                    | cell activation involved in immune response (GO:0002263)         | 8 / 723  | 1.14E-05         |
|                    | regulated exocytosis (GO:0045055)                                | 9 / 799  | 1.56E-05         |
|                    | exocytosis (GO:0006887)                                          | 9 / 921  | 5.32E-05         |
|                    | leukocyte mediated immunity (GO:0002443)                         | 8 / 891  | 5.81E-05         |
|                    | immune effector process (GO:0002252)                             | 8 / 1310 | 1.12E-03         |
|                    | leukocyte activation (GO:0045321)                                | 8 / 1346 | 1.38E-03         |
|                    | secretion (GO:0046903)                                           | 9/1396   | 1.82E-03         |
|                    | export from cell (GO:0140352)                                    | 8/1450   | 2.43E-03         |
|                    | cell activation (GO:0001775)                                     | 8/1510   | 3.30E-03         |
|                    | secretion (GO:0046903)                                           | 8/1538   | 3.79E-03         |
|                    | vesicle-mediated transport (GO:0016192)                          | 9/2193   | 4.72E-03         |
|                    | regulation of immune response (GO:0050776)                       | 7/998    | 4.98E-03         |
|                    | regulation of immune system process (GO:0002682)                 | 9/1625   | 6.42E-03         |
|                    | immune system process (GO:0002376)                               | 12/3322  | 6.66E-03         |
|                    | immune response (GO:0006955)                                     | 10/2326  | 7.47E-03         |
| <b>miR-195-5p</b>  | neutrophil degranulation (GO:0043312)                            | 14/484   | 1.36E-08         |
|                    | neutrophil activation involved in immune response (GO:0002283)   | 14/487   | 1.48E-08         |
|                    | neutrophil mediated immunity (GO:0002446)                        | 14/498   | 2.00E-08         |
|                    | neutrophil activation (GO:0042119)                               | 14/500   | 2.11E-08         |
|                    | granulocyte activation (GO:0036230)                              | 14/507   | 2.54E-08         |
|                    | leukocyte degranulation (GO:0043299)                             | 14/539   | 5.72E-08         |



**Table S5a (continued)**

|                    | Pathway/term                                                     | Overlap | Adjusted P-value |
|--------------------|------------------------------------------------------------------|---------|------------------|
| <b>miR-195-5p</b>  | myeloid cell activation involved in immune response (GO:0002275) | 14/549  | 7.30E-08         |
|                    | myeloid leukocyte mediated immunity (GO:0002444)                 | 14/556  | 8.63E-08         |
|                    | regulated exocytosis (GO:0045055)                                | 15/799  | 9.23E-07         |
|                    | myeloid leukocyte activation (GO:0002274)                        | 14/673  | 1.06E-06         |
|                    | leukocyte activation involved in immune response (GO:0002366)    | 14/719  | 2.48E-06         |
|                    | cell activation involved in immune response (GO:0002263)         | 14/723  | 2.67E-06         |
|                    | leukocyte mediated immunity (GO:0002443)                         | 15/891  | 4.12E-06         |
|                    | exocytosis (GO:0006887)                                          | 15/921  | 6.46E-06         |
|                    | immune effector process (GO:0002252)                             | 16/1310 | 1.01E-04         |
|                    | secretion by cell (GO:0032940)                                   | 16/1396 | 2.43E-04         |
|                    | export from cell (GO:0140352)                                    | 16/1450 | 4.08E-04         |
|                    | immune response (GO:0006955)                                     | 20/2326 | 4.33E-04         |
|                    | cell activation (GO:0001775)                                     | 16/1510 | 7.09E-04         |
|                    | secretion (GO:0046903)                                           | 16/1538 | 9.09E-04         |
|                    | leukocyte activation (GO:0045321)                                | 15/1346 | 9.66E-04         |
|                    | regulation of immune response (GO:0050776)                       | 11/998  | 6.45E-03         |
|                    | immune system process (GO:0002376)                               | 22/3322 | 7.60E-03         |
|                    | cellular defense response (GO:0006968)                           | 4/53    | 8.65E-03         |
|                    | regulation of immune system process (GO:0002682)                 | 14/1625 | 1.13E-02         |
|                    | vesicle-mediated transport (GO:0016192)                          | 17/2193 | 2.10E-02         |
|                    | defense response (GO:0006952)                                    | 14/1831 | 3.21E-02         |
| <b>miR-125b-5p</b> | neutrophil degranulation (GO:0043312)                            | 6/484   | 8.36E-03         |
|                    | neutrophil activation involved in immune response (GO:0002283)   | 6/487   | 8.67E-03         |
|                    | neutrophil mediated immunity (GO:0002446)                        | 6/498   | 9.85E-03         |
|                    | neutrophil activation (GO:0042119)                               | 6/500   | 1.01E-02         |
|                    | granulocyte activation (GO:0036230)                              | 6/507   | 1.09E-02         |
|                    | leukocyte degranulation (GO:0043299)                             | 6/539   | 1.55E-02         |
|                    | myeloid cell activation involved in immune response (GO:0002275) | 6/549   | 1.72E-02         |
|                    | myeloid leukocyte activation (GO:0002274)                        | 6/556   | 1.85E-02         |

**Table S5b: Reactome pathways of negatively correlated asthma genes per miRNA**

|                    | Pathway/term                                                                       | Overlap   | Adjusted P-value |
|--------------------|------------------------------------------------------------------------------------|-----------|------------------|
| <b>miR-199b-5p</b> | Cilium Assembly (R-HSA-5617833)                                                    | 44 / 201  | 1.22E-11         |
|                    | Intraflagellar transport (R-HSA-5620924)                                           | 20 / 54   | 8.97E-09         |
|                    | Organelle biogenesis and maintenance (R-HSA-1852241)                               | 46 / 293  | 6.54E-07         |
|                    | Neutrophil degranulation (R-HSA-6798695)                                           | 17 / 474  | 1.57E-05         |
|                    | Innate Immune System (R-HSA-168249)                                                | 19 / 1073 | 4.18E-04         |
|                    | Immune System (R-HSA-168256)                                                       | 25 / 2116 | 2.18E-02         |
|                    | Cargo trafficking to the periciliary membrane (R-HSA-5620920)                      | 12 / 51   | 2.96E-02         |
| <b>miR-223-3p</b>  | Intraflagellar transport (R-HSA-5620924)                                           | 30/54     | 5.77E-04         |
|                    | Regulation of Apoptosis (R-HSA-169911)                                             | 26/53     | 5.34E-03         |
|                    | Regulation of ornithine decarboxylase (R-HSA-350562)                               | 25/51     | 8.40E-03         |
|                    | Negative regulation of NOTCH4 signaling (R-HSA-9604323)                            | 25/53     | 1.99E-02         |
|                    | Regulation of activated PAK-2p34 by proteasome mediated degradation (R-HSA-211733) | 24/50     | 2.05E-02         |
|                    | AUF1 (hnRNP D0) binds and destabilizes mRNA (R-HSA-450408)                         | 25/54     | 3.00E-02         |
|                    | Cilium Assembly (R-HSA-5617833)                                                    | 74/201    | 3.06E-02         |
|                    | Metabolism of polyamines (R-HSA-351202)                                            | 26/58     | 4.15E-02         |
|                    | SCF-beta-TrCP mediated degradation of Emi1 (R-HSA-174113)                          | 25/55     | 4.43E-02         |
|                    | Degradation of AXIN (R-HSA-4641257)                                                | 25/55     | 4.43E-02         |
|                    | Ubiquitin-dependent degradation of Cyclin D (R-HSA-75815)                          | 24/52     | 4.69E-02         |
|                    | Vpu mediated degradation of CD4 (R-HSA-180534)                                     | 24/52     | 4.69E-02         |
| <b>miR-199b-3p</b> | Neutrophil degranulation (R-HSA-6798695)                                           | 11 / 474  | 8.03E-06         |
|                    | Innate Immune System (R-HSA-168249)                                                | 10 / 1073 | 3.73E-03         |
|                    | Immune System (R-HSA-168256)                                                       | 14/2116   | 3.70E-02         |
| <b>miR-181b-5p</b> | Neutrophil degranulation (R-HSA-6798695)                                           | 8 / 474   | 5.90E-06         |
|                    | Immune System (R-HSA-168256)                                                       | 13 / 2116 | 4.08E-04         |
|                    | Innate Immune System (R-HSA-168249)                                                | 9 / 1071  | 2.05E-03         |
| <b>miR-195-5p</b>  | Neutrophil degranulation (R-HSA-6798695)                                           | 14/474    | 1.47E-06         |
|                    | Innate Immune System (R-HSA-168249)                                                | 17/1073   | 2.40E-04         |
|                    | Immune System (R-HSA-168256)                                                       | 22/2116   | 4.29E-03         |
| <b>miR-125b-5p</b> | Neutrophil degranulation (R-HSA-6798695)                                           | 6 / 474   | 2.75E-02         |

# Supplementary Table S6. Gene ontology and pathway analyses using Enrichr

**Table 6a: Biological processes of positively and negatively correlated asthma genes per miRNA**

|                    | Pathway/term                                                                  | Overlap | Adjusted P-value |
|--------------------|-------------------------------------------------------------------------------|---------|------------------|
| <b>miR-199b-5p</b> | cilium assembly (GO:0060271)                                                  | 84/288  | 9,90E-36         |
|                    | cilium organization (GO:0044782)                                              | 60/192  | 1,31E-27         |
|                    | plasma membrane bounded cell projection assembly (GO:0120031)                 | 59/241  | 3,63E-21         |
|                    | organelle assembly (GO:0070925)                                               | 70/376  | 8,68E-18         |
|                    | intraciliary transport (GO:0042073)                                           | 23/46   | 1,14E-16         |
|                    | intraciliary transport involved in cilium assembly (GO:0035735)               | 21/40   | 6,75E-16         |
|                    | protein transport along microtubule (GO:0098840)                              | 11/16   | 1,04E-10         |
|                    | axoneme assembly (GO:0035082)                                                 | 13/24   | 1,47E-10         |
|                    | cilium-dependent cell motility (GO:0060285)                                   | 12/24   | 2,56E-09         |
|                    | cilium movement (GO:0003341)                                                  | 16/49   | 1,14E-08         |
|                    | protein complex localization (GO:0031503)                                     | 11/22   | 1,20E-08         |
|                    | axonemal dynein complex assembly (GO:0070286)                                 | 13/33   | 2,03E-08         |
|                    | ciliary basal body-plasma membrane docking (GO:0097711)                       | 22/96   | 3,43E-08         |
|                    | neutrophil degranulation (GO:0043312)                                         | 53/479  | 9,81E-06         |
|                    | neutrophil activation involved in immune response (GO:0002283)                | 53/483  | 1,24E-05         |
|                    | neutrophil mediated immunity (GO:0002446)                                     | 53/487  | 1,56E-05         |
|                    | motile cilium assembly (GO:0044458)                                           | 6/13    | 5,21E-05         |
|                    | epithelial cilium movement (GO:0003351)                                       | 6/15    | 1,37E-04         |
|                    | positive regulation of telomerase RNA localization to Cajal body (GO:1904874) | 6/15    | 1,37E-04         |
|                    | intraciliary retrograde transport (GO:0035721)                                | 5/10    | 1,44E-04         |
|                    | smoothened signaling pathway (GO:0007224)                                     | 8/30    | 2,75E-04         |
|                    | chaperone-mediated protein complex assembly (GO:0051131)                      | 6/17    | 3,06E-04         |
| <b>miR-223-3p</b>  | cilium assembly (GO:0060271)                                                  | 79/288  | 4,85E-24         |
|                    | cilium organization (GO:0044782)                                              | 55/192  | 2,66E-17         |
|                    | organelle assembly (GO:0070925)                                               | 78/376  | 4,81E-16         |
|                    | intraciliary transport (GO:0042073)                                           | 26/46   | 4,81E-16         |
|                    | intraciliary transport involved in cilium assembly (GO:0035735)               | 24/40   | 1,25E-15         |
|                    | plasma membrane bounded cell projection assembly (GO:0120031)                 | 59/241  | 1,57E-15         |
|                    | protein transport along microtubule (GO:0098840)                              | 11/16   | 2,19E-07         |
|                    | protein complex localization (GO:0031503)                                     | 12/22   | 1,39E-06         |
|                    | ciliary basal body-plasma membrane docking (GO:0097711)                       | 22/96   | 1,41E-04         |
|                    | axoneme assembly (GO:0035082)                                                 | 10/24   | 5,50E-04         |
|                    | neutrophil degranulation (GO:0043312)                                         | 61/479  | 5,50E-04         |
|                    | neutrophil activation involved in immune response (GO:0002283)                | 61/483  | 6,63E-04         |
|                    | neutrophil mediated immunity (GO:0002446)                                     | 61/487  | 8,01E-04         |
|                    | smoothened signaling pathway (GO:0007224)                                     | 10/30   | 4,31E-03         |

Table S6a continued

|                    | Pathway/term                                                                  | Overlap | Adjusted P-value |
|--------------------|-------------------------------------------------------------------------------|---------|------------------|
| <b>miR-223-3p</b>  | positive regulation of telomerase RNA localization to Cajal body (GO:1904874) | 7/15    | 6,00E-03         |
|                    | virion assembly (GO:0019068)                                                  | 7/15    | 1,42E-02         |
|                    | chaperone-mediated protein complex assembly (GO:0051131)                      | 7/15    | 1,42E-02         |
|                    | regulation of telomerase RNA localization to Cajal body (GO:1904872)          | 7/18    | 2,01E-02         |
|                    | cellular protein complex assembly (GO:0043623)                                | 23/144  | 2,01E-02         |
|                    | multivesicular body assembly (GO:0036258)                                     | 9/30    | 2,01E-02         |
|                    | cilium-dependent cell motility (GO:0060285)                                   | 8/24    | 2,01E-02         |
|                    | small nucleolar ribonucleoprotein complex assembly (GO:0000491)               | 5/9     | 2,24E-02         |
|                    | multivesicular body organization (GO:0036257)                                 | 9/31    | 2,33E-02         |
|                    | postreplication repair (GO:0006301)                                           | 11/47   | 3,55E-02         |
|                    | intraciliary retrograde transport (GO:0035721)                                | 5/10    | 3,63E-02         |
|                    | regulation of extracellular exosome assembly (GO:1903551)                     | 4/6     | 3,63E-02         |
|                    | positive regulation of exosomal secretion (GO:1903543)                        | 6/15    | 3,63E-02         |
|                    | G2/M transition of mitotic cell cycle (GO:0000086)                            | 20/126  | 4,05E-02         |
|                    | cell cycle G2/M phase transition (GO:0044839)                                 | 20/127  | 4,35E-02         |
|                    | regulation of exosomal secretion (GO:1903541)                                 | 6/16    | 4,93E-02         |
| <b>miR-199b-3p</b> | potassium ion transport (GO:0006813)                                          | 10/61   | 3,73E-02         |
| <b>miR-142-5p</b>  | neutrophil degranulation (GO:0043312)                                         | 30/479  | 2,72E-05         |
|                    | neutrophil activation involved in immune response (GO:0002283)                | 30/483  | 2,72E-05         |
|                    | neutrophil mediated immunity (GO:0002446)                                     | 30/487  | 2,72E-05         |

**Table S6b: Reactome pathways of positively and negatively correlated asthma genes per miRNA**

|                    | Pathway/term                                                                      | Overlap | Adjusted P-value |
|--------------------|-----------------------------------------------------------------------------------|---------|------------------|
| <b>miR-199b-5p</b> | Assembly of the primary cilium (R-HSA-5617833)                                    | 59/187  | 2,11E-24         |
|                    | Intraflagellar transport (R-HSA-5620924)                                          | 24/41   | 8,94E-17         |
|                    | Organelle biogenesis and maintenance (R-HSA-1852241)                              | 65/326  | 1,23E-15         |
|                    | Cargo trafficking to the periciliary membrane (R-HSA-5620920)                     | 16/51   | 5,63E-06         |
|                    | Anchoring of the basal body to the plasma membrane (R-HSA-5620912)                | 22/97   | 8,64E-06         |
|                    | BBSome-mediated cargo-targeting to cilium (R-HSA-5620922)                         | 10/23   | 5,12E-05         |
|                    | Cooperation of Prefoldin and TriC/CCT in actin and tubulin folding (R-HSA-389958) | 09/32   | 1,07E-02         |
|                    | Prefoldin mediated transfer of substrate to CCT/TriC (R-HSA-389957)               | 08/27   | 1,58E-02         |
|                    | HSF1 activation (R-HSA-3371511)                                                   | 08/29   | 2,44E-02         |
|                    | Formation of tubulin folding intermediates by CCT/TriC (R-HSA-389960)             | 07/25   | 4,95E-02         |
| <b>miR-223-3p</b>  | Assembly of the primary cilium (R-HSA-5617833)                                    | 60/187  | 4,58E-22         |
|                    | Intraflagellar transport (R-HSA-5620924)                                          | 25/41   | 1,20E-16         |
|                    | Organelle biogenesis and maintenance (R-HSA-1852241)                              | 69/326  | 6,57E-15         |
|                    | Anchoring of the basal body to the plasma membrane (R-HSA-5620912)                | 23/97   | 3,12E-05         |
|                    | Cargo trafficking to the periciliary membrane (R-HSA-5620920)                     | 15/51   | 2,08E-04         |
|                    | BBSome-mediated cargo-targeting to cilium (R-HSA-5620922)                         | 10/23   | 2,08E-04         |
|                    | Cooperation of Prefoldin and TriC/CCT in actin and tubulin folding (R-HSA-389958) | 11/32   | 8,13E-04         |
|                    | Prefoldin mediated transfer of substrate to CCT/TriC (R-HSA-389957)               | 10/27   | 8,93E-04         |
|                    | Membrane Trafficking (R-HSA-199991)                                               | 53/420  | 1,43E-03         |
|                    | Formation of tubulin folding intermediates by CCT/TriC (R-HSA-389960)             | 9/25    | 2,75E-03         |
|                    | Post-chaperonin tubulin folding pathway (R-HSA-389977)                            | 8/22    | 6,08E-03         |
|                    | Vesicle-mediated transport (R-HSA-5653656)                                        | 57/492  | 6,08E-03         |
|                    | HSF1 activation (R-HSA-3371511)                                                   | 9/29    | 8,07E-03         |
|                    | Hedgehog 'off' state (R-HSA-5610787)                                              | 18/99   | 9,33E-03         |
|                    | G2/M Transition (R-HSA-69275)                                                     | 26/173  | 9,33E-03         |
|                    | Mitotic G2-G2/M phases (R-HSA-453274)                                             | 26/175  | 1,06E-02         |
|                    | Attenuation phase (R-HSA-3371568)                                                 | 8/26    | 1,63E-02         |
|                    | Activation of BAD and translocation to mitochondria (R-HSA-111447)                | 6/15    | 1,90E-02         |
|                    | Signaling by Hedgehog (R-HSA-5358351)                                             | 21/136  | 2,20E-02         |
|                    | Transcriptional Regulation by TP53 (R-HSA-3700989)                                | 41/348  | 2,55E-02         |
|                    | Protein folding (R-HSA-391251)                                                    | 17/101  | 2,55E-02         |
|                    | Apoptotic cleavage of cell adhesion proteins (R-HSA-351906)                       | 5/11    | 2,55E-02         |
|                    | Activation of BH3-only proteins (R-HSA-114452)                                    | 8/29    | 2,76E-02         |
|                    | Cellular response to heat stress (R-HSA-3371556)                                  | 16/96   | 3,49E-02         |
|                    | Cell Cycle (R-HSA-1640170)                                                        | 59/566  | 3,49E-02         |

**Table S6b (continued)**

|                    | Pathway/term                                                                      | Overlap | Adjusted P-value |
|--------------------|-----------------------------------------------------------------------------------|---------|------------------|
| <b>miR-223-3p</b>  | Chk1/Chk2(Cds1) mediated inactivation of Cyclin B:Cdk1 complex (R-HSA-75035)      | 5/12    | 3,49E-02         |
|                    | Centrosome maturation (R-HSA-380287)                                              | 14/79   | 3,51E-02         |
|                    | Recruitment of mitotic centrosome proteins and complexes (R-HSA-380270)           | 14/79   | 3,51E-02         |
|                    | Regulation of HSF1-mediated heat shock response (R-HSA-3371453)                   | 14/80   | 3,85E-02         |
|                    | Golgi-to-ER retrograde transport (R-HSA-8856688)                                  | 17/110  | 4,84E-02         |
| <b>miR-199b-3p</b> | Potassium Channels (R-HSA-1296071)                                                | 13/99   | 9,59E-03         |
| <b>miR-142-5p</b>  | Cargo trafficking to the periciliary membrane (R-HSA-5620920)                     | 5/51    | 2,78E-06         |
|                    | Assembly of the primary cilium (R-HSA-5617833)                                    | 17/187  | 5,28E-05         |
|                    | BBSome-mediated cargo-targeting to cilium (R-HSA-5620922)                         | 7/23    | 5,28E-05         |
|                    | Prefoldin mediated transfer of substrate to CCT/TriC (R-HSA-389957)               | 6/27    | 2,27E-03         |
|                    | Organelle biogenesis and maintenance (R-HSA-1852241)                              | 19/326  | 4,27E-03         |
|                    | Cooperation of Prefoldin and TriC/CCT in actin and tubulin folding (R-HSA-389958) | 6/32    | 4,27E-03         |
|                    | Formation of tubulin folding intermediates by CCT/TriC (R-HSA-389960)             | 5/25    | 1,23E-02         |
|                    | Detoxification of Reactive Oxygen Species (R-HSA-3299685)                         | 5/33    | 4,21E-02         |
|                    | Lysosome Vesicle Biogenesis (R-HSA-432720)                                        | 5/35    | 4,58E-02         |
|                    | Transcriptional Regulation by TP53 (R-HSA-3700989)                                | 17/348  | 4,58E-02         |

**Supplementary Table S7. Gene ontology and pathway analyses using g:Profiler**

**Table 7a: Biological processes of positively and negatively correlated asthma genes per miRNA**

|                    | Pathway/term                                                                     | Overlap  | Adjusted P-value |
|--------------------|----------------------------------------------------------------------------------|----------|------------------|
| <b>miR-199b-5p</b> | cilium organization (GO:0044782)                                                 | 116/440  | 2,47E-42         |
|                    | cilium assembly (GO:0060271)                                                     | 108/418  | 2,83E-38         |
|                    | cell projection assembly (GO:0030031)                                            | 115/630  | 2,42E-26         |
|                    | plasma membrane bounded cell projection assembly (GO:0120031)                    | 114/616  | 4,90E-26         |
|                    | microtubule-based movement (GO:0007018)                                          | 81/385   | 2,23E-23         |
|                    | organelle assembly (GO:0070925)                                                  | 136/921  | 3,91E-22         |
|                    | intraciliary transport (GO:0042073)                                              | 28/53    | 1,17E-18         |
|                    | microtubule-based process (GO:0007017)                                           | 132/927  | 1,91E-17         |
|                    | microtubule-based transport (GO:0099111)                                         | 50/196   | 6,70E-16         |
|                    | axoneme assembly (GO:0035082)                                                    | 32/82    | 4,36E-15         |
|                    | intraciliary transport involved in cilium assembly (GO:0035735)                  | 21/40    | 2,14E-13         |
|                    | cilium movement (GO:0003341)                                                     | 42/172   | 7,25E-12         |
|                    | cell projection organization (GO:0030030)                                        | 164/1636 | 1,71E-10         |
|                    | microtubule bundle formation (GO:0001578)                                        | 32/113   | 1,76E-10         |
|                    | plasma membrane bounded cell projection organization (GO:0120036)                | 159/1596 | 7,49E-10         |
|                    | cilium or flagellum-dependent cell motility (GO:0001539)                         | 32/133   | 9,76E-10         |
|                    | cilium-dependent cell motility (GO:0060285)                                      | 32/133   | 9,76E-10         |
|                    | protein localization to cilium (GO:0061512)                                      | 22/62    | 4,22E-09         |
|                    | axonemal dynein complex assembly (GO:0070286)                                    | 17/39    | 8,55E-09         |
|                    | leukocyte degranulation (GO:0043299)                                             | 19/538   | 1,20E-08         |
|                    | extracellular transport (GO:0006858)                                             | 17/37    | 1,25E-08         |
|                    | transport along microtubule (GO:0010970)                                         | 34/162   | 1,35E-08         |
|                    | myeloid cell activation involved in immune response (GO:0002275)                 | 19/552   | 1,87E-08         |
|                    | neutrophil degranulation (GO:0043312)                                            | 18/483   | 1,95E-08         |
|                    | myeloid leukocyte mediated immunity (GO:0002444)                                 | 19/558   | 2,26E-08         |
|                    | neutrophil activation involved in immune response (GO:0002283)                   | 18/488   | 2,32E-08         |
|                    | epithelial cilium movement involved in extracellular fluid movement (GO:0003351) | 16/34    | 3,36E-08         |
|                    | neutrophil mediated immunity (GO:0002446)                                        | 18/500   | 3,46E-08         |
|                    | neutrophil activation (GO:0042119)                                               | 18/502   | 3,70E-08         |
|                    | granulocyte activation (GO:0036230)                                              | 18/509   | 4,65E-08         |
|                    | cytoskeleton-dependent intracellular transport (GO:0030705)                      | 37/200   | 8,15E-08         |
|                    | myeloid leukocyte activation (GO:0002274)                                        | 19/671   | 5,30E-07         |
|                    | leukocyte activation involved in immune response (GO:0002366)                    | 19/726   | 1,85E-06         |
|                    | cell activation involved in immune response (GO:0002263)                         | 19/727   | 2,03E-06         |
|                    | motile cilium assembly (GO:0044458)                                              | 16/47    | 4,16E-06         |
|                    | microtubule cytoskeleton organization (GO:0000226)                               | 80/663   | 5,66E-06         |
|                    | determination of left/right symmetry (GO:0007368)                                | 22/128   | 6,60E-06         |
|                    | regulated exocytosis (GO:0045055)                                                | 19/790   | 8,00E-06         |

**Table S7a (continued)**

|                    | Pathway/term                                              | Overlap  | Adjusted P-value |
|--------------------|-----------------------------------------------------------|----------|------------------|
| <b>miR-199b-5p</b> | exocytosis (GO:0006887)                                   | 20/906   | 1,24E-05         |
|                    | determination of bilateral symmetry (GO:0009855)          | 22/136   | 2,12E-05         |
|                    | specification of symmetry (GO:0009799)                    | 22/137   | 2,44E-05         |
|                    | ciliary basal body-plasma membrane docking (GO:0097711)   | 22/95    | 2,49E-05         |
|                    | outer dynein arm assembly (GO:0036158)                    | 10/22    | 3,94E-05         |
|                    | cilium movement involved in cell motility (GO:0060294)    | 24/120   | 4,39E-05         |
|                    | leukocyte mediated immunity (GO:0002443)                  | 19/888   | 5,32E-05         |
|                    | sperm motility (GO:0097722)                               | 22/109   | 1,44E-04         |
|                    | flagellated sperm motility (GO:0030317)                   | 22/109   | 1,44E-04         |
|                    | organelle localization by membrane tethering (GO:0140056) | 29/174   | 3,25E-04         |
|                    | vesicle-mediated transport (GO:0016192)                   | 28/2193  | 9,58E-04         |
|                    | membrane docking (GO:0022406)                             | 29/183   | 9,80E-04         |
|                    | non-motile cilium assembly (GO:1905515)                   | 15/58    | 9,82E-04         |
|                    | smoothened signaling pathway (GO:0007224)                 | 25/141   | 1,17E-03         |
|                    | secretion by cell (GO:0032940)                            | 21/1351  | 1,91E-03         |
|                    | protein-containing complex localization (GO:0031503)      | 37/289   | 2,11E-03         |
|                    | immune effector process (GO:0002252)                      | 19/1135  | 2,41E-03         |
|                    | protein localization to ciliary membrane (GO:1903441)     | 6/12     | 3,00E-03         |
|                    | export from cell (GO:0140352)                             | 21/1413  | 3,95E-03         |
|                    | secretion (GO:0046903)                                    | 21/1492  | 9,39E-03         |
|                    | immune response (GO:0006955)                              | 21/2544  | 9,74E-03         |
|                    | left/right pattern formation (GO:0060972)                 | 6/21     | 1,02E-02         |
|                    | leukocyte activation (GO:0045321)                         | 12/1341  | 2,08E-02         |
|                    | cellular component assembly (GO:0022607)                  | 229/3104 | 2,13E-02         |
|                    | establishment of left/right asymmetry (GO:0061966)        | 3/3      | 2,23E-02         |
|                    | inner dynein arm assembly (GO:0036159)                    | 7/16     | 2,27E-02         |
|                    | cerebrospinal fluid circulation (GO:0090660)              | 5/10     | 2,62E-02         |
|                    | autocrine signaling (GO:0035425)                          | 3/8      | 3,06E-02         |
|                    | organelle organization (GO:0006996)                       | 292/4136 | 3,08E-02         |
|                    | cytoskeleton organization (GO:0007010)                    | 122/1473 | 3,21E-02         |
|                    | RNA localization to nucleus (GO:0090685)                  | 7/19     | 4,31E-02         |
|                    | telomerase RNA localization (GO:0090672)                  | 7/19     | 4,31E-02         |
|                    | telomerase RNA localization to Cajal body (GO:0090671)    | 7/19     | 4,31E-02         |
|                    | RNA localization to Cajal body (GO:0090670)               | 7/19     | 4,31E-02         |
|                    | neutrophil aggregation (GO:0070488)                       | 2/2      | 4,93E-02         |
| <b>miR-223-3p</b>  | cilium organization (GO:0044782)                          | 102/440  | 2,17E-24         |
|                    | cilium assembly (GO:0060271)                              | 95/418   | 7,55E-22         |
|                    | organelle assembly (GO:0070925)                           | 152/921  | 1,42E-20         |
|                    | intraciliary transport (GO:0042073)                       | 31/53    | 2,79E-19         |
|                    | cell projection assembly (GO:0030031)                     | 112/630  | 6,62E-17         |



**Table S7a (continued)**

|                   | Pathway/term                                                      | Overlap  | Adjusted P-value |
|-------------------|-------------------------------------------------------------------|----------|------------------|
| <b>miR-223-3p</b> | intraciliary transport involved in cilium assembly (GO:0035735)   | 25/40    | 8,44E-17         |
|                   | plasma membrane bounded cell projection assembly (GO:0120031)     | 110/616  | 1,04E-16         |
|                   | microtubule-based transport (GO:0099111)                          | 55/196   | 3,10E-16         |
|                   | microtubule-based process (GO:0007017)                            | 142/927  | 2,16E-15         |
|                   | microtubule-based movement (GO:0007018)                           | 77/385   | 5,69E-14         |
|                   | cytoskeleton-dependent intracellular transport (GO:0030705)       | 52/200   | 1,15E-13         |
|                   | transport along microtubule (GO:0010970)                          | 45/162   | 1,03E-12         |
|                   | cell projection organization (GO:0030030)                         | 191/1636 | 1,32E-09         |
|                   | plasma membrane bounded cell projection organization (GO:0120036) | 187/1596 | 1,76E-09         |
|                   | organelle organization (GO:0006996)                               | 383/4136 | 7,65E-07         |
|                   | cellular component assembly (GO:0022607)                          | 301/3104 | 1,31E-06         |
|                   | protein localization (GO:0008104)                                 | 144/2670 | 1,08E-05         |
|                   | macromolecule localization (GO:0033036)                           | 203/3148 | 1,12E-05         |
|                   | neutrophil mediated immunity (GO:0002446)                         | 48/500   | 2,13E-05         |
|                   | cellular localization (GO:0051641)                                | 281/3519 | 3,71E-05         |
|                   | exocytosis (GO:0006887)                                           | 73/906   | 3,97E-05         |
|                   | microtubule cytoskeleton organization (GO:0000226)                | 87/663   | 4,91E-05         |
|                   | neutrophil degranulation (GO:0043312)                             | 46/483   | 5,64E-05         |
|                   | neutrophil activation (GO:0042119)                                | 53/502   | 5,65E-05         |
|                   | myeloid cell activation involved in immune response (GO:0002275)  | 50/552   | 6,91E-05         |
|                   | extracellular vesicle biogenesis (GO:0140112)                     | 9/23     | 7,67E-05         |
|                   | neutrophil activation involved in immune response (GO:0002283)    | 46/488   | 7,71E-05         |
|                   | leukocyte degranulation (GO:0043299)                              | 49/538   | 8,05E-05         |
|                   | granulocyte activation (GO:0036230)                               | 53/509   | 8,99E-05         |
|                   | myeloid leukocyte mediated immunity (GO:0002444)                  | 50/558   | 9,76E-05         |
|                   | cellular component biogenesis (GO:0044085)                        | 312/3377 | 1,08E-04         |
|                   | vesicle-mediated transport (GO:0016192)                           | 142/2193 | 1,47E-04         |
|                   | ciliary basal body-plasma membrane docking (GO:0097711)           | 22/95    | 1,76E-04         |
|                   | secretion by cell (GO:0032940)                                    | 95/1351  | 2,08E-04         |
|                   | membrane docking (GO:0022406)                                     | 32/183   | 2,78E-04         |
|                   | organelle localization by membrane tethering (GO:0140056)         | 31/174   | 2,83E-04         |
|                   | protein localization to cell periphery (GO:1990778)               | 24/339   | 3,33E-04         |
|                   | regulation of protein localization to cell periphery (GO:1904375) | 14/128   | 3,60E-04         |
|                   | establishment of localization in cell (GO:0051649)                | 176/2778 | 3,61E-04         |
|                   | cell redox homeostasis (GO:0045454)                               | 6/43     | 3,70E-04         |
|                   | exosomal secretion (GO:1990182)                                   | 8/20     | 3,80E-04         |
|                   | organelle localization (GO:0051640)                               | 73/657   | 3,88E-04         |
|                   | export from cell (GO:0140352)                                     | 94/1413  | 4,51E-04         |
|                   | extracellular exosome biogenesis (GO:0097734)                     | 8/21     | 5,96E-04         |

**Table S7a (continued)**

|                   | Pathway/term                                                                | Overlap  | Adjusted P-value |
|-------------------|-----------------------------------------------------------------------------|----------|------------------|
| <b>miR-223-3p</b> | protein-containing complex localization                                     | 42/289   | 8,69E-04         |
|                   | protein localization to cilium                                              | 17/62    | 1,51E-03         |
|                   | secretion                                                                   | 99/1492  | 1,67E-03         |
|                   | regulation of exosomal secretion                                            | 7/17     | 1,88E-03         |
|                   | regulation of protein localization to plasma membrane                       | 12/107   | 2,19E-03         |
|                   | regulation of organelle assembly                                            | 31/192   | 2,27E-03         |
|                   | cellular protein catabolic process                                          | 38/822   | 2,93E-03         |
|                   | establishment of protein localization                                       | 101/1866 | 3,41E-03         |
|                   | regulation of protein localization to membrane                              | 16/203   | 4,18E-03         |
|                   | intracellular transport                                                     | 148/1723 | 4,19E-03         |
|                   | multivesicular body assembly                                                | 7/30     | 4,23E-03         |
|                   | protein localization to plasma membrane                                     | 20/287   | 4,88E-03         |
|                   | multivesicular body organization                                            | 7/31     | 5,37E-03         |
|                   | transport                                                                   | 287/5214 | 7,89E-03         |
|                   | axoneme assembly                                                            | 19/82    | 8,05E-03         |
|                   | cellular protein localization                                               | 119/1842 | 8,21E-03         |
|                   | cytoskeleton organization                                                   | 149/1473 | 8,71E-03         |
|                   | protein localization to membrane                                            | 35/698   | 9,07E-03         |
|                   | protein transport                                                           | 114/1754 | 1,04E-02         |
|                   | myeloid leukocyte activation                                                | 51/671   | 1,07E-02         |
|                   | establishment of localization                                               | 293/5364 | 1,13E-02         |
|                   | positive regulation of protein localization to cell periphery               | 9/71     | 1,15E-02         |
|                   | cellular macromolecule localization                                         | 119/1856 | 1,18E-02         |
|                   | regulated exocytosis                                                        | 59/790   | 1,20E-02         |
|                   | protein catabolic process                                                   | 41/983   | 1,42E-02         |
|                   | positive regulation of exosomal secretion                                   | 6/15     | 1,51E-02         |
|                   | leukocyte activation involved in immune response                            | 43/723   | 1,57E-02         |
|                   | cell activation involved in immune response                                 | 43/727   | 1,80E-02         |
|                   | maintenance of DNA repeat elements                                          | 4/6      | 2,02E-02         |
|                   | positive regulation of ATPase activity                                      | 13/60    | 2,10E-02         |
|                   | regulation of organelle organization                                        | 115/1228 | 2,74E-02         |
|                   | localization within membrane                                                | 39/775   | 2,78E-02         |
|                   | smoothened signaling pathway                                                | 25/141   | 2,84E-02         |
|                   | positive regulation of viral release from host cell                         | 5/15     | 3,14E-02         |
|                   | cellular catabolic process                                                  | 75/2381  | 3,46E-02         |
|                   | chaperone-mediated protein complex assembly                                 | 6/23     | 3,57E-02         |
|                   | positive regulation of telomerase RNA localization to Cajal body            | 7/15     | 3,76E-02         |
|                   | positive regulation of protein localization to plasma membrane (GO:1903078) | 8/64     | 4,41E-02         |
|                   | protein localization to ciliary membrane (GO:1903441)                       | 6/12     | 4,63E-02         |

Table S7a (continued)

|                    | Pathway/term                                                      | Overlap | Adjusted P-value |
|--------------------|-------------------------------------------------------------------|---------|------------------|
| <b>miR-223-3p</b>  | post-Golgi vesicle-mediated transport (GO:0006892)                | 16/144  | 4,94E-02         |
|                    | regulation of extracellular exosome assembly (GO:1903551)         | 4/6     | 4,99E-02         |
| <b>miR-199b-3p</b> | anatomical structure morphogenesis (GO:0009653)                   | 24/2816 | 7,00E-03         |
|                    | cell development (GO:0048468)                                     | 22/2122 | 7,35E-03         |
|                    | cell morphogenesis (GO:0000902)                                   | 25/1045 | 7,52E-03         |
|                    | cell adhesion (GO:0007155)                                        | 33/1502 | 1,51E-02         |
|                    | biological adhesion (GO:0022610)                                  | 33/1509 | 1,66E-02         |
|                    | negative regulation of cell projection organization (GO:0031345)  | 8/192   | 2,85E-02         |
|                    | negative regulation of neuron projection development (GO:0010977) | 7/142   | 3,46E-02         |
| <b>miR-142-5p</b>  | exocytosis (GO:0006887)                                           | 43/906  | 4,96E-05         |
|                    | myeloid cell activation involved in immune response (GO:0002275)  | 15/552  | 6,91E-05         |
|                    | neutrophil degranulation (GO:0043312)                             | 8/483   | 7,83E-05         |
|                    | neutrophil activation involved in immune response (GO:0002283)    | 8/488   | 8,48E-05         |
|                    | neutrophil mediated immunity (GO:0002446)                         | 8/500   | 1,02E-04         |
|                    | neutrophil activation (GO:0042119)                                | 8/502   | 1,06E-04         |
|                    | granulocyte activation (GO:0036230)                               | 8/509   | 1,18E-04         |
|                    | cell redox homeostasis (GO:0045454)                               | 8/43    | 1,20E-04         |
|                    | leukocyte degranulation (GO:0043299)                              | 30/538  | 1,47E-04         |
|                    | regulated exocytosis (GO:0045055)                                 | 9/790   | 2,16E-04         |
|                    | myeloid leukocyte mediated immunity (GO:0002444)                  | 8/558   | 2,39E-04         |
|                    | leukocyte activation involved in immune response (GO:0002366)     | 16/723  | 3,85E-04         |
|                    | cell activation involved in immune response (GO:0002263)          | 16/727  | 4,15E-04         |
|                    | myeloid leukocyte activation (GO:0002274)                         | 15/671  | 8,66E-04         |
|                    | extracellular vesicle biogenesis (GO:0140112)                     | 6/23    | 3,87E-03         |
|                    | immune effector process (GO:0002252)                              | 8/1135  | 4,11E-03         |
|                    | secretion by cell (GO:0032940)                                    | 51/1351 | 7,14E-03         |
|                    | leukocyte mediated immunity (GO:0002443)                          | 8/888   | 8,05E-03         |
|                    | secretion (GO:0046903)                                            | 57/1492 | 9,93E-03         |
|                    | cellular defense response (GO:0006968)                            | 5/53    | 9,93E-03         |
|                    | export from cell (GO:0140352)                                     | 52/1413 | 1,50E-02         |
|                    | regulation of immune system process (GO:0002682)                  | 10/1734 | 1,79E-02         |
|                    | vesicle-mediated transport (GO:0016192)                           | 71/2193 | 2,91E-02         |
|                    | cell activation (GO:0001775)                                      | 8/1507  | 3,42E-02         |
|                    | exosomal secretion (GO:1990182)                                   | 5/20    | 3,69E-02         |
|                    | regulation of antigen processing and presentation (GO:0002577)    | 3/21    | 3,74E-02         |
|                    | immune system process (GO:0002376)                                | 13/3438 | 3,84E-02         |
|                    | extracellular exosome biogenesis (GO:00977340)                    | 5/21    | 4,78E-02         |
| <b>miR-181b-5p</b> | flavonoid metabolic process (GO:0009812)                          | 4/17    | 4,84E-05         |
|                    | xenobiotic metabolic process (GO:0006805)                         | 6/116   | 1,04E-03         |
|                    | cellular response to xenobiotic stimulus (GO:0071466)             | 6/121   | 1,34E-03         |

**Table S7a (continued)**

|                    | Pathway/term                                                                 | Overlap | Adjusted P-value |
|--------------------|------------------------------------------------------------------------------|---------|------------------|
| <b>miR-181b-5p</b> | flavonoid metabolic process (GO:0009812)                                     | 4/17    | 4,84E-05         |
|                    | xenobiotic metabolic process (GO:0006805)                                    | 6/116   | 1,04E-03         |
|                    | cellular response to xenobiotic stimulus (GO:0071466)                        | 6/121   | 1,34E-03         |
|                    | response to xenobiotic stimulus (GO:0009410)                                 | 9/129   | 1,42E-03         |
|                    | flavonoid glucuronidation (GO:0052696)                                       | 2/9     | 4,98E-03         |
|                    | primary alcohol catabolic process (GO:0034310)                               | 3/16    | 5,13E-03         |
|                    | xenobiotic glucuronidation (GO:0052697)                                      | 2/11    | 7,60E-03         |
|                    | regulation of mitotic spindle assembly (GO:1901673)                          | 6/19    | 1,54E-02         |
|                    | secretion (GO:0046903)                                                       | 89/1492 | 1,55E-02         |
|                    | cellular glucuronidation (GO:0052695)                                        | 2/20    | 2,62E-02         |
|                    | uronic acid metabolic process (GO:0006063)                                   | 2/25    | 4,14E-02         |
|                    | glucuronate metabolic process (GO:0019585)                                   | 2/25    | 4,14E-02         |
| <b>miR-195-5p</b>  | negative regulation of cell projection organization (GO:0031345)             | 7/192   | 1,89E-02         |
|                    | anatomical structure morphogenesis (GO:0009653)                              | 35/2816 | 2,12E-02         |
|                    | cell morphogenesis (GO:0000902)                                              | 19/1045 | 2,38E-02         |
|                    | cell adhesion (GO:0007155)                                                   | 32/1502 | 2,64E-02         |
|                    | biological adhesion (GO:0022610)                                             | 32/1509 | 2,90E-02         |
|                    | neuron projection development (GO:0031175)                                   | 13/1021 | 3,58E-02         |
|                    | negative regulation of neuron projection development (GO:0010977)            | 6/142   | 3,78E-02         |
|                    | homophilic cell adhesion via plasma membrane adhesion molecules (GO:0007156) | 9/167   | 4,67E-02         |
| <b>miR-125b-5p</b> | neuron projection development (GO:0031175)                                   | 11/1021 | 7,01E-03         |
|                    | animal organ morphogenesis (GO:0009887)                                      | 10/1079 | 9,49E-03         |
|                    | cell development (GO:0048468)                                                | 15/2122 | 1,27E-02         |
|                    | neuron development (GO:0048666)                                              | 11/1159 | 2,37E-02         |
|                    | anatomical structure morphogenesis (GO:0009653)                              | 17/2816 | 2,97E-02         |
|                    | oligodendrocyte progenitor proliferation (GO:0070444)                        | 2/8     | 3,87E-02         |
|                    | regulation of oligodendrocyte progenitor proliferation (GO:0070445)          | 2/8     | 3,87E-02         |

**Table S7b: Reactome pathways of positively and negatively correlated asthma genes per miRNA**

|                    | Pathway/term                                                                      | Overlap | Adjusted P-value |
|--------------------|-----------------------------------------------------------------------------------|---------|------------------|
| <b>miR-199b-5p</b> | Cilium Assembly (R-HSA-5617833)                                                   | 62/201  | 7,17E-15         |
|                    | Intraflagellar transport (R-HSA-5620924)                                          | 27/54   | 5,60E-12         |
|                    | Organelle biogenesis and maintenance (R-HSA-1852241)                              | 67/293  | 4,95E-09         |
|                    | Neutrophil degranulation (R-HSA-6798695)                                          | 17/476  | 8,21E-05         |
|                    | Innate Immune System (R-HSA-168249)                                               | 19/1090 | 1,30E-03         |
|                    | Cargo trafficking to the periciliary membrane (R-HSA-5620920)                     | 16/51   | 3,91E-03         |
|                    | BBSome-mediated cargo-targeting to cilium (R-HSA-5620922)                         | 10/23   | 7,89E-03         |
|                    | Anchoring of the basal body to the plasma membrane (R-HSA-5620912)                | 22/96   | 4,04E-02         |
|                    | Immune System (R-HSA-168256)                                                      | 25/2038 | 4,54E-02         |
| <b>miR-223-3p</b>  | Intraflagellar transport (R-HSA-5620924)                                          | 30/54   | 9,29E-13         |
|                    | Cilium Assembly (R-HSA-5617833)                                                   | 62/201  | 1,59E-12         |
|                    | Organelle biogenesis and maintenance (R-HSA-1852241)                              | 67/293  | 3,01E-06         |
|                    | Cargo trafficking to the periciliary membrane (R-HSA-5620920)                     | 13/51   | 8,23E-05         |
|                    | BBSome-mediated cargo-targeting to cilium (R-HSA-5620922)                         | 8/23    | 9,18E-04         |
|                    | Prefoldin mediated transfer of substrate to CCT/TriC (R-HSA-389957)               | 9/28    | 8,30E-03         |
|                    | Formation of tubulin folding intermediates by CCT/TriC (R-HSA-389960)             | 8/26    | 3,52E-02         |
|                    | Cooperation of Prefoldin and TriC/CCT in actin and tubulin folding (R-HSA-389958) | 9/33    | 3,58E-02         |
| <b>miR-199b-3p</b> | Activated NTRK2 signals through PLCG1 (R-HSA-9026527)                             | 3/4     | 2,55E-02         |
| <b>miR-142-5p</b>  | Cargo trafficking to the periciliary membrane (R-HSA-5620920)                     | 11/51   | 5,87E-04         |
|                    | Neutrophil degranulation (R-HSA-679869)                                           | 8/476   | 8,47E-04         |
|                    | BBSome-mediated cargo-targeting to cilium (R-HSA-5620922)                         | 7/23    | 4,57E-03         |
|                    | Cilium Assembly (R-HSA-5617833)                                                   | 19/201  | 4,34E-02         |
| <b>miR-181b-5p</b> | Glucuronidation (R-HSA-156588)                                                    | 2/25    | 2,79E-02         |
