# Supplementary material
Source: HighWire-hosted journal article supplement (https://erj.ersjournals.com/content/59/3/2101294)
Supplement: inline-supplementary-material-2 [file inline-supplementary-material-2.pdf]

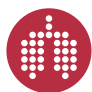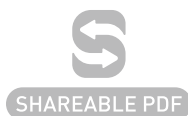

# Identification of asthma-associated microRNAs in bronchial biopsies

Mirjam P. Roffel<sup>1,2,3</sup>, Ilse M. Boudewijn<sup>2,4</sup>, Jos L.L. van Nijnatten<sup>1,2,5</sup>, Alen Faiz<sup>1,2,5</sup>,  
Corneel J. Vermeulen<sup>1,2,4</sup>, Antoon J. van Oosterhout<sup>6</sup>, Karen Affleck<sup>7</sup>, Wim Timens<sup>1,2</sup>, Ken R. Bracke<sup>3</sup>,  
Tania Maes<sup>3</sup>, Irene H. Heijink<sup>1,2,4</sup>, Corry-Anke Brandsma<sup>1,2,8</sup> and Maarten van den Berge<sup>2,4,8</sup>

<sup>1</sup>Dept of Pathology and Medical Biology, University of Groningen, University Medical Center Groningen, Groningen, The Netherlands. <sup>2</sup>Groningen Research Institute for Asthma and COPD, University of Groningen, University Medical Center Groningen, Groningen, The Netherlands. <sup>3</sup>Dept of Respiratory Medicine, Laboratory for Translational Research in Obstructive Pulmonary Diseases, Ghent University, University Hospital Ghent, Ghent, Belgium. <sup>4</sup>Dept of Pulmonology, University of Groningen, University Medical Center Groningen, Groningen, The Netherlands. <sup>5</sup>Faculty of Science, Respiratory Bioinformatics and Molecular Biology (RBMB), University of Technology Sydney, Sydney, Australia. <sup>6</sup>Allergic Inflammation Discovery Performance Unit, GlaxoSmithKline, Stevenage, UK. <sup>7</sup>Adaptive Immunity Research Unit, GlaxoSmithKline, Stevenage, UK. <sup>8</sup>Both C-A. Brandsma and M. van den Berge are senior authors and contributed equally to this work.

Corresponding author: Maarten van den Berge ([m.van.den.berge@umcg.nl](mailto:m.van.den.berge@umcg.nl))

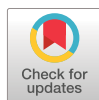

Shareable abstract (@ERSpublications)

Using small RNA sequencing on bronchial biopsies of asthma patients and healthy controls, this study identified microRNAs associated with clinical and inflammatory features of asthma that are potential regulators of asthma-associated gene expression <https://bit.ly/3rZXMDf>

**Cite this article as:** Roffel MP, Boudewijn IM, van Nijnatten JLL, *et al.* Identification of asthma-associated microRNAs in bronchial biopsies. *Eur Respir J* 2022; 59: 2101294 [DOI: 10.1183/13993003.01294-2021].

This single-page version can be shared freely online.

Copyright ©The authors 2022. For reproduction rights and permissions contact [permissions@ersnet.org](mailto:permissions@ersnet.org)

Received: 5 May 2021  
Accepted: 30 July 2021

## Abstract

**Background** Changes in microRNA (miRNA) expression can contribute to the pathogenesis of many diseases, including asthma. We aimed to identify miRNAs that are differentially expressed between asthma patients and healthy controls, and explore their association with clinical and inflammatory parameters of asthma.

**Methods** Differentially expressed miRNAs were determined by small RNA sequencing on bronchial biopsies of 79 asthma patients and 82 healthy controls using linear regression models. Differentially expressed miRNAs were associated with clinical and inflammatory asthma features. Potential miRNA–mRNA interactions were analysed using mRNA data available from the same bronchial biopsies, and enrichment of pathways was identified with Enrichr and g:Profiler.

**Results** In total, 78 differentially expressed miRNAs were identified in bronchial biopsies of asthma patients compared with controls, of which 60 remained differentially expressed after controlling for smoking and inhaled corticosteroid treatment. We identified several asthma-associated miRNAs, including miR-125b-5p and miR-223-3p, based on a significant association with multiple clinical and inflammatory asthma features and their negative correlation with genes associated with the presence of asthma. The most enriched biological pathway(s) affected by miR-125b-5p and miR-223-3p were inflammatory response and cilium assembly/organisation. Of interest, we identified that lower expression of miR-26a-5p was linked to more severe eosinophilic inflammation as measured in blood, sputum as well as bronchial biopsies.

**Conclusion** Collectively, we identified miR-125b-5p, miR-223-3p and miR-26a-5p as potential regulators that could contribute to the pathogenesis of asthma.
